# Supplementary material
Source: PubMed Central journal article supplement (PMC6450284)
Supplement: jama-321-1261-s002.pdf [file jama-321-1261-s002.pdf]

**Summary of Changes in the Protocol**

The following changes listed in Table 1 represent clarification, version control, and corrective changes to the CABANA Protocol, Version 3.1, (August 19, 2009). These changes were approved by the CABANA Leadership Team at Mayo Clinic and Duke Clinical Research Institute (DCRI).

**Table 1. Summary of Protocol Changes**

| <b>Section/Page</b> | <b>Version 3.0 June 19, 2009</b> | <b>Version 3.1 August 19, 2009</b>                                                                                                                                   | <b>Rationale</b>                                         |
|---------------------|----------------------------------|----------------------------------------------------------------------------------------------------------------------------------------------------------------------|----------------------------------------------------------|
| Title Page          | NA                               | <b>Grant Number:</b> 1U01HL089709-01A1<br><b>Grant Number:</b> 1U01HL089786-01A1<br><b>Grant Number:</b> 1U01HL089907-01A1<br><b>Grant Number:</b> 1U01HL089645-01A1 | Clarification<br><b>No change to study procedures.</b>   |
| Title Page          | Version: 3.0                     | Version: 3.1                                                                                                                                                         | Version control<br><b>No change to study procedures.</b> |
| Title Page          | Date: June 19, 2009              | Date: August 19, 2009                                                                                                                                                | Version control<br><b>No change to study procedures.</b> |
| Footer Throughout   | June 19, 2009                    | August 19, 2009                                                                                                                                                      | Version control<br><b>No change to study procedures.</b> |
| Page 6              | CRF 312.64B                      | CFR 812 (Subpart E).                                                                                                                                                 | Correction<br><b>No change to study procedures.</b>      |
| 4.4.3/24            | Symptom Event Recorder           | <b>CABANA Box</b><br>Symptom Event Recorder                                                                                                                          | Clarification<br><b>No change to study procedures.</b>   |
| 8.2.8/41            | NA                               | Bang and Tsiatis                                                                                                                                                     | Correction<br><b>No change in study procedures.</b>      |

**Summary of Changes in the Protocol**

The following changes listed in Table 1 represent clarification, version control, and corrective changes to the CABANA Protocol, Version 3.2, (24 November, 2009). These changes were approved by the CABANA Leadership Team at Mayo Clinic and Duke Clinical Research Institute (DCRI).

**Table 1. Summary of Protocol Changes**

| Section/Page      | Version 3.1 19 August, 2009                      | Version 3.2 24 November, 2009                                                                                                                                                                                                                                                                                                                                     | Rationale                                                |
|-------------------|--------------------------------------------------|-------------------------------------------------------------------------------------------------------------------------------------------------------------------------------------------------------------------------------------------------------------------------------------------------------------------------------------------------------------------|----------------------------------------------------------|
| Title Page / 1    | Version: 3.1                                     | Version: 3.2                                                                                                                                                                                                                                                                                                                                                      | Version control<br><b>No change to study procedures.</b> |
| Title Page / 1    | Date: 19 August, 2009                            | Date: 24 November, 2009                                                                                                                                                                                                                                                                                                                                           | Version control<br><b>No change to study procedures.</b> |
| Footer Throughout | 19 August, 2009                                  | 24 November, 2009                                                                                                                                                                                                                                                                                                                                                 | Version control<br><b>No change to study procedures.</b> |
| Contacts / 2      | Not previously listed                            | <b><u>National Heart Lung and Blood Institute</u></b><br><br>NHLBI<br>Two Rockledge Centre<br>Suite 8170, MSC 7940<br>6701 Rockledge Dr.<br>Bethesda, MD 20892-7940<br>(Fed-Ex Zipcode 20817)<br><br><b>Project Officer:</b> Alice M. Mascette, MD<br>Phone:301-435-0504<br>Fax: 301-480-7404<br><a href="mailto:mascetta@mail.nih.gov">mascetta@mail.nih.gov</a> | Clarification<br><b>No change to study procedures.</b>   |
| Contacts / 3      | Phone: 507-284-4937<br><br>Not previously listed | Phone: 507-284-2997<br><br><b>Co-Investigator:</b> David Holmes, III<br>PhD<br>Phone: 507-284-2997                                                                                                                                                                                                                                                                | Clarification<br><b>No change to study procedures.</b>   |

|            |                                                                                                                                                                                                                                                                                                                                                     |                                                                                                                                                                                                                                                                                                                                                                                                                                                                                                                                                            |                                                                                                                                                                                       |
|------------|-----------------------------------------------------------------------------------------------------------------------------------------------------------------------------------------------------------------------------------------------------------------------------------------------------------------------------------------------------|------------------------------------------------------------------------------------------------------------------------------------------------------------------------------------------------------------------------------------------------------------------------------------------------------------------------------------------------------------------------------------------------------------------------------------------------------------------------------------------------------------------------------------------------------------|---------------------------------------------------------------------------------------------------------------------------------------------------------------------------------------|
|            |                                                                                                                                                                                                                                                                                                                                                     | <p>Fax: 507-284-1632<br/> <a href="mailto:Holmes.david3@mayo.edu">Holmes.david3@mayo.edu</a></p> <p><b>Data Management:</b> Maryam Rettmann, PhD<br/> Phone: 507-284-2997<br/> Fax: 507-284-1632<br/> <a href="mailto:rettmann.maryam@mayo.edu">rettmann.maryam@mayo.edu</a></p>                                                                                                                                                                                                                                                                           |                                                                                                                                                                                       |
| TOC / 8    | Version 3.1                                                                                                                                                                                                                                                                                                                                         | Updated to version 3.2                                                                                                                                                                                                                                                                                                                                                                                                                                                                                                                                     | <p>Clarification</p> <p><b>No change to study procedures.</b></p>                                                                                                                     |
| 4.2 / 23   | Baseline economic, functional status, and quality of life data, including SF-36, DASI, Toronto Atrial Fibrillation Severity Scale, and the AF Symptom Checklist will be collected via a structured questionnaire interview conducted by the Site Coordinator prior to randomization.                                                                | Baseline functional status, <i>economic data (including two EQ-5D forms that rate the patient's health by using a 0-100 "thermometer" and asking 5 brief questions)</i> , and quality of life data <i>(including a Baseline Questionnaire of validated scales, ie, SF-36, DASI, Toronto Atrial Fibrillation Severity Scale, AF Effects on QOL (AFEQT), Work Productivity and Activity Impairment Instrument (WPAI), and Stanford Presenteeism scale)</i> will be collected by the Site Coordinator <i>via structured interview</i> prior to randomization. | <p>Clarification and to provide outcomes for secondary endpoints and objectives:</p> <p>9. Medical costs, resource utilization, and cost effectiveness</p> <p>10. Quality of Life</p> |
| 4.4.1 / 24 | <ol style="list-style-type: none"> <li>1. Historical examination including Drug History assessment</li> <li>2. Physical examination</li> <li>3. ECG</li> <li>4. Blood Tests (INR, creatinine, hemoglobin, hematocrit)</li> <li>5. 24-hour Holter monitoring</li> <li>6. Trans-thoracic 2-D echocardiography</li> <li>7. Trans-esophageal</li> </ol> | <ol style="list-style-type: none"> <li>1. Historical examination including Drug History assessment <i>(within 60 days prior to randomization)</i></li> <li>2. Physical examination <i>(within 60 days prior to randomization)</i></li> <li>3. ECG <i>(within 60 days prior to randomization)</i></li> <li>4. Blood Tests (INR, creatinine, hemoglobin, hematocrit) <i>(within 7 days prior to treatment)</i></li> <li>5. 24-hour Holter monitoring <i>(within 12</i></li> </ol>                                                                            | <p>Clarification</p> <p><b>No change to study procedures.</b></p>                                                                                                                     |

|                   |                                                                                                                                                                                                                                                                                                                                                                                                                                                                                                                                                                                                                                                                                                                                                                                               |                                                                                                                                                                                                                                                                                                                                                                                                                                                                                                                                                                                                                                                                                                                                                                                                                                                                                                                                                                       |                                                                                                                                                                                       |
|-------------------|-----------------------------------------------------------------------------------------------------------------------------------------------------------------------------------------------------------------------------------------------------------------------------------------------------------------------------------------------------------------------------------------------------------------------------------------------------------------------------------------------------------------------------------------------------------------------------------------------------------------------------------------------------------------------------------------------------------------------------------------------------------------------------------------------|-----------------------------------------------------------------------------------------------------------------------------------------------------------------------------------------------------------------------------------------------------------------------------------------------------------------------------------------------------------------------------------------------------------------------------------------------------------------------------------------------------------------------------------------------------------------------------------------------------------------------------------------------------------------------------------------------------------------------------------------------------------------------------------------------------------------------------------------------------------------------------------------------------------------------------------------------------------------------|---------------------------------------------------------------------------------------------------------------------------------------------------------------------------------------|
|                   | <p>echocardiogram</p> <p>8. CT /MR evaluation (all ablation patients and 375 Drug patients)</p> <p>9. Economics and Quality of Life Assessment</p>                                                                                                                                                                                                                                                                                                                                                                                                                                                                                                                                                                                                                                            | <p><i>months prior to randomization)</i></p> <p>6. Trans-thoracic 2-D echocardiography <i>(within 4 months prior to randomization)</i></p> <p>7. Trans-esophageal echocardiogram <i>(within 48 hours prior to treatment)</i></p> <p>8. CT /MR evaluation (all ablation patients and 375 Drug patients) <i>(within 4 months prior to treatment)</i></p> <p>9. Economics and Quality of Life Assessment <i>(after consent, prior to randomization)</i></p>                                                                                                                                                                                                                                                                                                                                                                                                                                                                                                              |                                                                                                                                                                                       |
| <p>4.4.2 / 24</p> | <p>Follow-up in all patients will occur at 3, 6, and 12 months following randomization during the first year and every 6 months thereafter, with clinic visits, phone follow-up, and other testing as described below. Economic and QOL data, including SF-36, DAS1, Toronto Atrial Fibrillation Severity Scale, the AF Symptom Checklist, Cardiac Self-Efficacy and Stanford Presenteeism scale will be repeated during the 3 month follow-up visit and annually by trained telephone interviewer staff from the EQOL Coordinating Center (EQOL CC) for patients enrolled in North America and by the Site Coordinator in sites outside North America. A Brief Follow-up Questionnaire capturing atrial fibrillation severity and symptoms will be collected at 6, 18, 30 and 42 months.</p> | <p>Follow-up in all patients will occur at 3, 6, and 12 months following randomization during the first year and every 6 months thereafter, with clinic visits, phone follow-up, and other testing as described below. Economic and QOL data, including <i>a full follow-up questionnaire of validated scales, ie,</i> SF-36, DAS1, Toronto Atrial Fibrillation Severity Scale, AF <i>Effects on QOL (AFEQT), Work Productivity and Activity Impairment Instrument (WPAI)</i>, and Stanford Presenteeism scale, will be repeated <i>at 3 months</i> and annually <i>from randomization</i> by trained telephone interviewer staff from the EQOL Coordinating Center (EQOL CC) for patients enrolled in North America and by the Site Coordinator in sites outside North America. A Brief Follow-up Questionnaire capturing atrial fibrillation severity and symptoms, <i>work productivity/activity/presenteeism</i> will be collected at 6, 18, 30 and 42 months</p> | <p>Clarification and to provide outcomes for secondary endpoints and objectives:</p> <p>9. Medical costs, resource utilization, and cost effectiveness</p> <p>10. Quality of Life</p> |

|            |                                                                                                                                                                                                                                                                                                                                                                                                       |                                                                                                                                                                                                                                                                                                                                                                                                                                                                                                                                                                                                                                                                                                                                                                                                                                                                    |                                                                                                                     |
|------------|-------------------------------------------------------------------------------------------------------------------------------------------------------------------------------------------------------------------------------------------------------------------------------------------------------------------------------------------------------------------------------------------------------|--------------------------------------------------------------------------------------------------------------------------------------------------------------------------------------------------------------------------------------------------------------------------------------------------------------------------------------------------------------------------------------------------------------------------------------------------------------------------------------------------------------------------------------------------------------------------------------------------------------------------------------------------------------------------------------------------------------------------------------------------------------------------------------------------------------------------------------------------------------------|---------------------------------------------------------------------------------------------------------------------|
|            | <p>Medical bills for patients enrolled at US sites will be collected throughout the trial by the EQOL Coordinating Center economic team. The Site Coordinators will complete a one page Rapid Report Form (RRF) at each CABANA study visit documenting any interim all-cause hospitalizations, ER visits since last contact and will forward them to the EQOL Coordinating Center for processing.</p> | <p><i>post randomization. All above follow-up visits/calls should be completed within 30 days +/- of the due date. (Ex: 3 month visit: completed between 60 days and 120 days of randomization)</i></p> <p>Medical bills for patients enrolled at US sites will be collected throughout the trial by the EQOL Coordinating Center economic team. The Site Coordinators will complete a one page Rapid Report Form (RRF) at each CABANA study visit documenting any interim all-cause hospitalizations, ER visits since last contact and will forward them to the EQOL Coordinating Center for processing. <i>As part of the economic data in CABANA, two EQ-5D forms that rate the patient's health by using a 0-100 "thermometer" and asking 5 brief questions will be collected by the Site Coordinator throughout the trial and entered into the e-CRF.</i></p> |                                                                                                                     |
| 4.4.3 / 26 | Not previously listed                                                                                                                                                                                                                                                                                                                                                                                 | <i>5): Hospital discharge or following Drug Therapy initiation</i>                                                                                                                                                                                                                                                                                                                                                                                                                                                                                                                                                                                                                                                                                                                                                                                                 | <p>Clarification</p> <p><b>No change to study procedures.</b></p>                                                   |
| 5.2.2 / 27 | Tambacor<br>Tykosin<br>Quini-glute                                                                                                                                                                                                                                                                                                                                                                    | <i>Tambacor<br/>Tikosyn<br/>Quinaglute/ dex</i>                                                                                                                                                                                                                                                                                                                                                                                                                                                                                                                                                                                                                                                                                                                                                                                                                    | <p>Clarification</p> <p><b>No change to study procedures.</b></p>                                                   |
| 5.2.2 / 27 | Not previously listed                                                                                                                                                                                                                                                                                                                                                                                 | <i>Multaq (dronedarone) should not be used in patients with NYHA IV heart failure, or NYHA Class II-III heart failure with a recent decompensation requiring hospitalization or referral to a specialized heart failure clinic.</i>                                                                                                                                                                                                                                                                                                                                                                                                                                                                                                                                                                                                                                | <p>Clarification in response to FDA letter dated October 14, 2009.</p> <p><b>No change to study procedures.</b></p> |
| 6.2 / 32   | Secondary endpoint events, including composite endpoints of                                                                                                                                                                                                                                                                                                                                           | Relocated this statement as a stand-alone paragraph for clarity:                                                                                                                                                                                                                                                                                                                                                                                                                                                                                                                                                                                                                                                                                                                                                                                                   | <p>Clarification</p> <p><b>No change to study procedures.</b></p>                                                   |

|             |                                                                                                                                                                                                                                                                                                                                                                                                                                                                                                                                                                                                                                                                                                                                                                                                                                                                                                                                                                                                                                 |                                                                                                                                                                                                                                                                                                   |                                                                                       |
|-------------|---------------------------------------------------------------------------------------------------------------------------------------------------------------------------------------------------------------------------------------------------------------------------------------------------------------------------------------------------------------------------------------------------------------------------------------------------------------------------------------------------------------------------------------------------------------------------------------------------------------------------------------------------------------------------------------------------------------------------------------------------------------------------------------------------------------------------------------------------------------------------------------------------------------------------------------------------------------------------------------------------------------------------------|---------------------------------------------------------------------------------------------------------------------------------------------------------------------------------------------------------------------------------------------------------------------------------------------------|---------------------------------------------------------------------------------------|
|             | <p>mortality, disabling stroke, serious bleeding, or cardiac arrest will be confirmed and adjudicated in a similar manner by the CEC. A Disabling Stroke will be considered present using a modification of A Rankin Stroke score [100], and will be adjudicated by a Neurologic Events Committee. Serious (or Life-threatening) bleeding will be considered present using a modification of the GUSTO bleeding Scale adapted for use in catheter ablation [101]. These events will be tracked regardless of treatment randomization. While hospitalization for AF in both treatment arms will be carefully tracked and compared, it will be considered as an "AF recurrence" and counted against efficacy, not safety. The definition for each of these events is listed in the CEC Charter. When there is disagreement between the CEC and the principal investigator, the CEC's decision will be considered final. Procedures for adjudicating events are described in the CEC Charter, which is available upon request.</p> | <p><i>While hospitalization for AF in both treatment arms will be carefully tracked and compared, it will be considered as an "AF recurrence" and counted against efficacy, not safety. Therefore, AF recurrence and/or worsening of AF does not need to be reported as an adverse event.</i></p> |                                                                                       |
| 11.1.2 / 45 | <p>Any site may be terminated from the trial if it fails to comply with the above requirements. Specifically,</p>                                                                                                                                                                                                                                                                                                                                                                                                                                                                                                                                                                                                                                                                                                                                                                                                                                                                                                               | <p>Any <b>activated</b> site may be terminated from the trial <b>for failure to enroll any subjects, within a reasonable period of</b></p>                                                                                                                                                        | <p>Clarification requested by the DSMB.<br/><b>No change to study procedures.</b></p> |

|  |                                                                                                                                                                                                                                                                                                                                                                                                                                                                                                                                                                            |                                                                                                                                                                                                                                                                                                                                                                                                                                                                                                                                                                                                                                                                                                                                                                                                                           |  |
|--|----------------------------------------------------------------------------------------------------------------------------------------------------------------------------------------------------------------------------------------------------------------------------------------------------------------------------------------------------------------------------------------------------------------------------------------------------------------------------------------------------------------------------------------------------------------------------|---------------------------------------------------------------------------------------------------------------------------------------------------------------------------------------------------------------------------------------------------------------------------------------------------------------------------------------------------------------------------------------------------------------------------------------------------------------------------------------------------------------------------------------------------------------------------------------------------------------------------------------------------------------------------------------------------------------------------------------------------------------------------------------------------------------------------|--|
|  | <p>any site consistently failing to provide timely reports or inadequate data quality will be withdrawn from active enrollment. A cross-over rate <math>\geq 10\%</math> over any 6 month period will result in a warning to that site. A crossover rate <math>&gt;15\%</math> will prompt suspension of enrollment. A 3-month period for resolving any operational difficulties will be required prior to reinstating or permanently terminating a specific site to further enrollment. All patients randomized must be followed until death or the end of the trial.</p> | <p><i>time. Also, any site may be suspended from active enrollment, if it fails to meet reasonable enrollment goals or comply with study procedures.</i> Specifically, any site consistently failing to provide timely reports or adequate data quality will be withdrawn from active enrollment. A cross-over rate <math>\geq 10\%</math> over any 6 month period will result in a warning to that site. A crossover rate <math>&gt;15\%</math> will prompt suspension of enrollment. A 3-month period for resolving any operational difficulties will be required prior to reinstating or permanently terminating a specific site to further enrollment. All subjects randomized must be followed until death or the end of the trial, even if the site has been inactivated due to enrollment or study compliance.</p> |  |
|--|----------------------------------------------------------------------------------------------------------------------------------------------------------------------------------------------------------------------------------------------------------------------------------------------------------------------------------------------------------------------------------------------------------------------------------------------------------------------------------------------------------------------------------------------------------------------------|---------------------------------------------------------------------------------------------------------------------------------------------------------------------------------------------------------------------------------------------------------------------------------------------------------------------------------------------------------------------------------------------------------------------------------------------------------------------------------------------------------------------------------------------------------------------------------------------------------------------------------------------------------------------------------------------------------------------------------------------------------------------------------------------------------------------------|--|

**Summary of Changes in the Protocol**

The following changes listed in Table 1 represent clarification, version control, and corrective changes to the CABANA Protocol, Version 3.3, (03 March, 2010). These changes were approved by the CABANA Leadership Team at Mayo Clinic and Duke Clinical Research Institute (DCRI).

**Table 1. Summary of Protocol Changes**

| Section/Page      | Version 3.2 24 November, 2009                                                                                                                                                                                                                                                                                                                                                                                                                                                                                                                                                                                                     | Version 3.3 03 March, 2010                                                                                                                                                                                                                                                                                                                                                                                                                                                                                                                                                                                                                             | Rationale                                                                                                                                                                |
|-------------------|-----------------------------------------------------------------------------------------------------------------------------------------------------------------------------------------------------------------------------------------------------------------------------------------------------------------------------------------------------------------------------------------------------------------------------------------------------------------------------------------------------------------------------------------------------------------------------------------------------------------------------------|--------------------------------------------------------------------------------------------------------------------------------------------------------------------------------------------------------------------------------------------------------------------------------------------------------------------------------------------------------------------------------------------------------------------------------------------------------------------------------------------------------------------------------------------------------------------------------------------------------------------------------------------------------|--------------------------------------------------------------------------------------------------------------------------------------------------------------------------|
| Title Page / 1    | Version: 3.2                                                                                                                                                                                                                                                                                                                                                                                                                                                                                                                                                                                                                      | Version: 3.3                                                                                                                                                                                                                                                                                                                                                                                                                                                                                                                                                                                                                                           | Version control<br><b>No change to study procedures.</b>                                                                                                                 |
| Title Page / 1    | Date: 24 November, 2009                                                                                                                                                                                                                                                                                                                                                                                                                                                                                                                                                                                                           | Date: 03 March, 2010                                                                                                                                                                                                                                                                                                                                                                                                                                                                                                                                                                                                                                   | Version control<br><b>No change to study procedures.</b>                                                                                                                 |
| Footer Throughout | 24 November, 2009                                                                                                                                                                                                                                                                                                                                                                                                                                                                                                                                                                                                                 | 03 March, 2010                                                                                                                                                                                                                                                                                                                                                                                                                                                                                                                                                                                                                                         | Version control<br><b>No change to study procedures.</b>                                                                                                                 |
| TOC / 8           | Version 3.2                                                                                                                                                                                                                                                                                                                                                                                                                                                                                                                                                                                                                       | Updated to version 3.3                                                                                                                                                                                                                                                                                                                                                                                                                                                                                                                                                                                                                                 | Clarification<br><b>No change to study procedures.</b>                                                                                                                   |
| 4.4.1 / 24        | All patients will undergo standard baseline evaluation, including:<br>1. Historical examination including Drug History assessment (within 60 days prior to randomization)<br>2. Physical examination (within 60 days prior to randomization)<br>3. ECG (within 60 days prior to randomization)<br>4. Blood Tests (INR, creatinine, hemoglobin, hematocrit) (within 7 days prior to treatment)<br>5. 24-hour Holter monitoring (within 12 months prior to treatment)<br>6. Trans-thoracic 2-D echocardiography (within 4 months prior to randomization)<br>7. Trans-esophageal echocardiogram (within 48 hours prior to treatment) | Defining the eligibility of patients for the CABANA Trial will require information generated during the course of routine clinical care as dictated by their attending physician. This information should be, consistent with established guidelines, consensus documents, and good clinical practice. Selected baseline testing data will be collected in order to characterize the type, cause and severity of the patient's AF and the treatments received prior to enrollment. The baseline data will include information from the following clinical evaluations:<br>1. Relevant medical history including prior and current drug treatment of AF | FDA requested<br>Clarification<br>Delineation between the baseline testing considered part of routine clinical care from that specifically required for the CABANA Trial |



|  |                                                                                                                                                                                                                                                                                                                                                                                                                                                                                                                                                                                                                                                                                                                                                                                                                                                                                                                                                                                                                                                                                                                                                                                                                                                                                                                                                                                |                                                                                                                                                                                                                                                                                                                                                                                                                                                                                                                                                                                                                                                                                                                                                                                                                                                                                                                                                                                                                                                                                                                                                                                                                                                                                                    |  |
|--|--------------------------------------------------------------------------------------------------------------------------------------------------------------------------------------------------------------------------------------------------------------------------------------------------------------------------------------------------------------------------------------------------------------------------------------------------------------------------------------------------------------------------------------------------------------------------------------------------------------------------------------------------------------------------------------------------------------------------------------------------------------------------------------------------------------------------------------------------------------------------------------------------------------------------------------------------------------------------------------------------------------------------------------------------------------------------------------------------------------------------------------------------------------------------------------------------------------------------------------------------------------------------------------------------------------------------------------------------------------------------------|----------------------------------------------------------------------------------------------------------------------------------------------------------------------------------------------------------------------------------------------------------------------------------------------------------------------------------------------------------------------------------------------------------------------------------------------------------------------------------------------------------------------------------------------------------------------------------------------------------------------------------------------------------------------------------------------------------------------------------------------------------------------------------------------------------------------------------------------------------------------------------------------------------------------------------------------------------------------------------------------------------------------------------------------------------------------------------------------------------------------------------------------------------------------------------------------------------------------------------------------------------------------------------------------------|--|
|  | <p>8. CT /MR evaluation (all ablation patients and 375 Drug patients) (within 4 months prior to treatment)</p> <p>9. Economics and Quality of Life Assessment (after consent, prior to randomization)</p> <p>The trans-thoracic echocardiographic (TTE) studies are designed to characterize the substrate underlying the patient's AF, establishing the presence of LV dysfunction (LVEF), hypertrophy, diastolic dysfunction, or other structural abnormalities. The TTE will also assess LA size and volume, as well as echo measures of atrial function. Trans-esophageal echocardiographic (TEE) studies are designed to exclude the presence of intra-atrial thrombus as required prior to chemical or direct current cardioversion or ablative therapy. TEE data may also be used to confirm atrial size and morphology data. Information from all baseline testing will be entered into the Electronic Data Collection (EDC) system in specified eCRF fields. CT / MR studies will be undertaken in all ablation patients to serve as a baseline for quantitative LA size, morphology, and function studies, as well as PV and esophageal investigations. In addition, 375 patients randomized to drug therapy will undergo baseline scanning for comparisons in the atrial structure and function studies. These patients will be recruited from centers that are</p> | <p>2. Relevant physical examination</p> <p>3. 12 lead ECG prior to treatment</p> <p>4. Blood Tests (INR, creatinine, hemoglobin / hematocrit) (pre-treatment)</p> <p>5. Trans-thoracic 2-D echocardiography</p> <p>The trans-thoracic echocardiographic (TTE) data will be used to characterize the substrate underlying the patient's AF, establishing the presence of LV dysfunction (LVEF), hypertrophy, diastolic dysfunction, or other structural abnormalities. The TTE will also assess LA size and volume, and provide measures of atrial function.</p> <p>Following a recommended approach consistent with established guidelines, consensus documents, and good clinical practice, a trans-esophageal echocardiographic (TEE) study will be performed within 24 hours prior to ablation in patients with <i>persistent or longstanding persistent AF</i>. The TEE may be performed up to 48 hours before the procedure in patients on continuous warfarin at a therapeutic INR or in those appropriately bridged with intravenous un-fractionated or low molecular weight heparin.</p> <p>The performance of a pre-treatment TEE in patients with <i>paroxysmal AF</i> is left to the discretion of the investigator (5.4.4), but is not required in CABANA. Data on the performance</p> |  |
|--|--------------------------------------------------------------------------------------------------------------------------------------------------------------------------------------------------------------------------------------------------------------------------------------------------------------------------------------------------------------------------------------------------------------------------------------------------------------------------------------------------------------------------------------------------------------------------------------------------------------------------------------------------------------------------------------------------------------------------------------------------------------------------------------------------------------------------------------------------------------------------------------------------------------------------------------------------------------------------------------------------------------------------------------------------------------------------------------------------------------------------------------------------------------------------------------------------------------------------------------------------------------------------------------------------------------------------------------------------------------------------------|----------------------------------------------------------------------------------------------------------------------------------------------------------------------------------------------------------------------------------------------------------------------------------------------------------------------------------------------------------------------------------------------------------------------------------------------------------------------------------------------------------------------------------------------------------------------------------------------------------------------------------------------------------------------------------------------------------------------------------------------------------------------------------------------------------------------------------------------------------------------------------------------------------------------------------------------------------------------------------------------------------------------------------------------------------------------------------------------------------------------------------------------------------------------------------------------------------------------------------------------------------------------------------------------------|--|

|  |                                                                                                                                                                                                                            |                                                                                                                                                                                                                                                                                                                                                                                                                                                                                                                                                                                                                                                                                                                                                                                                                                                                                                                                                                                                                                                                                                                                                                                                                                                                                                                                                                                       |  |
|--|----------------------------------------------------------------------------------------------------------------------------------------------------------------------------------------------------------------------------|---------------------------------------------------------------------------------------------------------------------------------------------------------------------------------------------------------------------------------------------------------------------------------------------------------------------------------------------------------------------------------------------------------------------------------------------------------------------------------------------------------------------------------------------------------------------------------------------------------------------------------------------------------------------------------------------------------------------------------------------------------------------------------------------------------------------------------------------------------------------------------------------------------------------------------------------------------------------------------------------------------------------------------------------------------------------------------------------------------------------------------------------------------------------------------------------------------------------------------------------------------------------------------------------------------------------------------------------------------------------------------------|--|
|  | <p>committed to CT / MR assessment of each enrolled drug patient. Since randomization is performed (stratified) within each site, this component of the study will still benefit from the overall study randomization.</p> | <p>and results of all TEEs performed as part of routine care will be collected in the eCRF, however. TEE data may also be used to confirm atrial size and morphology. The approach to cardioversion in drug treated patients should follow the recommendations of AF Treatment Guidelines [92].</p> <p>In those centers where routine clinical practice includes the performance of pre-ablation CT / MR studies, relevant data from these studies will be collected to serve as a baseline for comparative quantitative LA size, morphology, and function studies, as well as subsequent follow-up PV and esophageal investigations. In addition at those centers, up to 375 patients randomized to drug therapy will be asked to undergo baseline research CT/MR scanning to allow the CABANA study to evaluate and compare atrial structure and function in response to drug or ablative therapy. These drug-treated patients will be recruited from selected centers that are committed to CT / MR assessment of enrolled drug patients. Since randomization is performed (stratified) within each site, this component of the study will still benefit from the overall study randomization. Optimally, the scans performed in all patients should be within 4 months prior to treatment.</p> <p>In addition to these clinically dictated studies, baseline economic and QOL</p> |  |
|--|----------------------------------------------------------------------------------------------------------------------------------------------------------------------------------------------------------------------------|---------------------------------------------------------------------------------------------------------------------------------------------------------------------------------------------------------------------------------------------------------------------------------------------------------------------------------------------------------------------------------------------------------------------------------------------------------------------------------------------------------------------------------------------------------------------------------------------------------------------------------------------------------------------------------------------------------------------------------------------------------------------------------------------------------------------------------------------------------------------------------------------------------------------------------------------------------------------------------------------------------------------------------------------------------------------------------------------------------------------------------------------------------------------------------------------------------------------------------------------------------------------------------------------------------------------------------------------------------------------------------------|--|

|                      |                                                                                                                                                                                                                                                                                                                                                                                                                                                                                                                                                                                                                                              |                                                                                                                                                                                                                                                                                                                                                                                                                                                                                                                                                                                                                                                                            |                                                                                                                                                         |
|----------------------|----------------------------------------------------------------------------------------------------------------------------------------------------------------------------------------------------------------------------------------------------------------------------------------------------------------------------------------------------------------------------------------------------------------------------------------------------------------------------------------------------------------------------------------------------------------------------------------------------------------------------------------------|----------------------------------------------------------------------------------------------------------------------------------------------------------------------------------------------------------------------------------------------------------------------------------------------------------------------------------------------------------------------------------------------------------------------------------------------------------------------------------------------------------------------------------------------------------------------------------------------------------------------------------------------------------------------------|---------------------------------------------------------------------------------------------------------------------------------------------------------|
|                      |                                                                                                                                                                                                                                                                                                                                                                                                                                                                                                                                                                                                                                              | data will be obtained after informed consent is obtained, but before randomization occurs.                                                                                                                                                                                                                                                                                                                                                                                                                                                                                                                                                                                 |                                                                                                                                                         |
| 4.4.2 / 25<br>para 2 | Medical bills for patients enrolled at US sites will be collected throughout the trial by the EQOL Coordinating Center economic team. The Site Coordinators will complete a one page Rapid Report Form (RRF) at each CABANA study visit documenting any interim all-cause hospitalizations, ER visits since last contact and will forward them to the EQOL Coordinating Center for processing. As part of the economic data in CABANA, two EQ-5D forms that rate the patient's health by using a 0-100 "thermometer" and asking 5 brief questions will be collected by the Site Coordinator throughout the trial and entered into the e-CRF. | Medical bills for patients enrolled at US sites will be collected throughout the trial by the EQOL Coordinating Center economic team. The Site Coordinators will complete a one page Rapid Report Form (RRF) at each CABANA study visit documenting any interim hospitalizations and/or, ER visits since last contact. These forms will be forwarded to the EQOL Coordinating Center for processing. As part of the economic data in CABANA, two EQ-5D forms that rate the patient's health by using a 0-100 "thermometer" and asking 5 brief questions will be collected by the Site Coordinator at each follow-up visit throughout the trial and entered into the e-CRF. | Clarification<br>Delineation between the baseline testing considered part of routine clinical care from that specifically required for the CABANA Trial |
| para 3               | ...(throughout trial)                                                                                                                                                                                                                                                                                                                                                                                                                                                                                                                                                                                                                        | ... (throughout the trial)                                                                                                                                                                                                                                                                                                                                                                                                                                                                                                                                                                                                                                                 |                                                                                                                                                         |
| para 4               | CT/MR imaging studies will be performed on all ablation subjects at baseline, 3 months post-ablation therapy, and as indicated for PV stenosis management throughout the trial. CT/MR imaging studies will also be performed on 375 drug therapy patients at baseline and 3 months after therapy is fully established (end of blanking period). It is essential that the same imaging modality, acquisition parameters, and imaging techniques be utilized for each subject at all time-points. CT/MR data will                                                                                                                              | CT/MR imaging studies will be performed where clinically indicated or otherwise part of routine clinical care on ablation subjects at baseline, at 3 months post-ablation therapy, and as indicated for PV stenosis management throughout the trial. At sites where baseline and follow-up CT/MR imaging studies are part of routine care for ablation patients, CT/MR imaging studies will also be performed for research purposes on up to 375 drug therapy patients at baseline and 3 months after therapy is                                                                                                                                                           |                                                                                                                                                         |

|                |                                                                                                                                                                                                                                                                                                                                                                                               |                                                                                                                                                                                                                                                                                                                                                                                                                                                 |                                                                                                                          |
|----------------|-----------------------------------------------------------------------------------------------------------------------------------------------------------------------------------------------------------------------------------------------------------------------------------------------------------------------------------------------------------------------------------------------|-------------------------------------------------------------------------------------------------------------------------------------------------------------------------------------------------------------------------------------------------------------------------------------------------------------------------------------------------------------------------------------------------------------------------------------------------|--------------------------------------------------------------------------------------------------------------------------|
|                | then be electronically transferred to a server at the Mayo Biomedical Imaging Resource, the CABANA Trial Image Analysis Lab. Scans will be anonymized at the site using a software tool provided by the Imaging Center. Each clinical center is required to perform standard site radiology evaluation and assessment of the CT/MR images according to the sites' standard clinical practice. | fully established (end of blanking period). CT/MR data will be electronically transferred to a server at the Mayo Biomedical Imaging Resource, the CABANA Trial Image Analysis Lab. Scans will be anonymized at the site using a software tool provided by the Imaging Center. Each clinical center will also perform standard site radiology evaluation and assessment of the CT/MR images according to the sites' standard clinical practice. |                                                                                                                          |
| 4.4.3/26       | All procedures and laboratory tests required for evaluation of follow-up should be performed whether or not a subject receives treatment according to the protocol.                                                                                                                                                                                                                           | All procedures and laboratory tests during follow-up should be performed whether or not a subject receives treatment according to the protocol.                                                                                                                                                                                                                                                                                                 | Clarification<br>Delineation of testing considered part of routine clinical care from that required for the CABANA Trial |
| 7.1.5 / 34     | 1. <b>Device-related:</b> any adverse event for which a causal relationship between the device and the event is a reasonable possibility. The likelihood that the event is device related will be categorized as listed above, the device-related "cause" will be categorized as follows:                                                                                                     | 1. <b>Device-related:</b> any adverse event for which a causal relationship between the device and the event is a reasonable possibility. The likelihood that the event is device related will also be sub-classified using the approach in 7.1.4 above. The event will be further classified as a device failure or malfunction (7.1.5.2) and whether it is unanticipated (7.1.5.3), as described in these sections.                           | FDA requested<br>Clarification<br><b>No change to study procedures.</b>                                                  |
| Appendix B /60 | P95005                                                                                                                                                                                                                                                                                                                                                                                        | P950005                                                                                                                                                                                                                                                                                                                                                                                                                                         | Clarification/Typo<br><b>No change to study procedures.</b>                                                              |

### Summary of Changes in the Protocol

The following changes listed in Table 1 represent clarification, version control, and corrective changes to the CABANA Protocol, Version 3.3, (03 March, 2010). These changes were approved by the CABANA Leadership Team at Mayo Clinic and Duke Clinical Research Institute (DCRI).

**Table 1. Summary of Protocol Changes**

| Sites/Protocol version | North America and International                                                                                                                                                                      | North America and International                                                                                                                                                                | International with full Clinical Trial Application (CTA) |                                                                                  |
|------------------------|------------------------------------------------------------------------------------------------------------------------------------------------------------------------------------------------------|------------------------------------------------------------------------------------------------------------------------------------------------------------------------------------------------|----------------------------------------------------------|----------------------------------------------------------------------------------|
| Section/Page           | Version 3.3 03 March, 2010                                                                                                                                                                           | Version 3.4 08 August, 2011                                                                                                                                                                    | Version 3.4.1 08 April, 2012                             | Rationale for change                                                             |
| Title Page / 1         | Version: 3.3                                                                                                                                                                                         | Version: 3.4                                                                                                                                                                                   | Version: 3.4.1                                           | Language revisions/insert for compliance with US /Foreign Regulatory Authorities |
| Title Page / 1         | Date: 03 March, 2010                                                                                                                                                                                 | Date: 08 August, 2011                                                                                                                                                                          | Date: 08 April, 2012                                     |                                                                                  |
| Title Page / 1         |                                                                                                                                                                                                      |                                                                                                                                                                                                | EudraCT-Number: 2011-002532-12                           | BfArM required                                                                   |
| Footer Throughout      | 03 March, 2010                                                                                                                                                                                       | 08 August, 2011                                                                                                                                                                                | 08 April, 2012                                           |                                                                                  |
| Contact / 2            | <b>Project Officer:</b><br>Alice M. Mascette, MD<br>Phone:301-435-0504<br>Fax: 301-480-7404<br><a href="mailto:mascetta@mail.nih.gov">mascetta@mail.nih.gov</a>                                      | <b>Project Officer:</b><br>Alice M. Mascette, MD<br>Phone:301-435-0477<br>Fax: 301-480-7971<br><a href="mailto:alice.mascetta@nih.gov">alice.mascetta@nih.gov</a>                              | No revision from 3.4                                     | Change of contact details                                                        |
| Contact / 2            | <b>Project Leader:</b><br>Kathleen L. Hoffmann, R.N.<br>Phone: 919-668-8277<br>Cell: 919-818-9461<br>Fax: 919-668-7105<br><a href="mailto:kathleen.hoffmann@duke.edu">kathleen.hoffmann@duke.edu</a> | <b>Project Leader:</b><br>Kathleen L. Moretz, R.N.<br>Phone: 919-668-8277<br>Cell: 919-818-9461<br>Fax: 919-668-7105<br><a href="mailto:kathleen.moretz@duke.edu">kathleen.moretz@duke.edu</a> | No revision from 3.4                                     | Change of contact details                                                        |
| Synopsis / 5           | Enrollment will occur over approximately 3 years, and subjects will be followed a                                                                                                                    | Enrollment will occur over approximately 4 years, and subjects will be followed a                                                                                                              | No revision from 3.4                                     | The enrollment period has been extended                                          |

|            |                                                                                                                                                                                                                                                                                                                                                                                                                                                                                                                                                                                                                                                                                                                                                        |                                                                                                                                                                                                                                                                                                                                                                                                                                                                                                                                                                                                                                                                                                                                                                                                                                                                                                          |                          |                                                        |
|------------|--------------------------------------------------------------------------------------------------------------------------------------------------------------------------------------------------------------------------------------------------------------------------------------------------------------------------------------------------------------------------------------------------------------------------------------------------------------------------------------------------------------------------------------------------------------------------------------------------------------------------------------------------------------------------------------------------------------------------------------------------------|----------------------------------------------------------------------------------------------------------------------------------------------------------------------------------------------------------------------------------------------------------------------------------------------------------------------------------------------------------------------------------------------------------------------------------------------------------------------------------------------------------------------------------------------------------------------------------------------------------------------------------------------------------------------------------------------------------------------------------------------------------------------------------------------------------------------------------------------------------------------------------------------------------|--------------------------|--------------------------------------------------------|
|            | minimum of 2 years.                                                                                                                                                                                                                                                                                                                                                                                                                                                                                                                                                                                                                                                                                                                                    | minimum of 2 years.                                                                                                                                                                                                                                                                                                                                                                                                                                                                                                                                                                                                                                                                                                                                                                                                                                                                                      |                          |                                                        |
| TOC / 8    | Version 3.3                                                                                                                                                                                                                                                                                                                                                                                                                                                                                                                                                                                                                                                                                                                                            | Updated to version 3.4                                                                                                                                                                                                                                                                                                                                                                                                                                                                                                                                                                                                                                                                                                                                                                                                                                                                                   | Updated to version 3.4.1 | Change of protocol version                             |
| 2.2.2 / 20 | By reducing the recurrence of AF, the proposed therapies should also reduce all cause and cardiovascular hospitalization.                                                                                                                                                                                                                                                                                                                                                                                                                                                                                                                                                                                                                              | By reducing the recurrence of AF, the proposed therapies should also reduce cardiovascular hospitalization.                                                                                                                                                                                                                                                                                                                                                                                                                                                                                                                                                                                                                                                                                                                                                                                              | No revision from 3.4     | Editorial change to increase the clarity of the text   |
| 3.1 / 21   | 1. Have documented AF episodes $\geq 1$ hour in duration; with $\geq 2$ episodes over 4 months with electrocardiographic documentation of 1 episode or at least 1 episode of AF lasting more than 1 week<br>4. Be $\geq 65$ yrs of age, or $< 65$ yrs with one or more of the following risk factors for stroke:<br>Hypertension defined as a BP $> 140/90$ mmHg [90], Diabetes defined as a fasting glucose $\geq 126$ mg/dl [91], Congestive heart failure (including systolic or diastolic heart failure), Prior stroke or TIA, LA size $> 5.0$ cm (or volume index $\geq 40$ cc/m <sup>2</sup> ), or EF $\leq 35$ . Subjects $< 65$ yrs of age whose only risk factor is hypertension must have a second risk factor or LV hypertrophy to qualify. | 1. Have <b>paroxysmal</b> AF episodes $\geq 1$ hour in duration; with $\geq 2$ episodes over <b>the preceding 6</b> months with <b>electrocardiographic documentation</b> of <b>at least 1</b> episode; or 1 <b>persistent or longstanding persistent</b> episode of AF lasting more than 1 week.<br>4. Be $\geq 65$ yrs of age, or $< 65$ yrs with <b>one or more</b> of the following risk factors for stroke:<br>Hypertension ( <b>treated and/or</b> defined as a BP $> 140/90$ mmHg) [90], Diabetes ( <b>treated and/or</b> defined as a fasting glucose $\geq 126$ mg/dl) [91], Congestive heart failure (including systolic or diastolic heart failure), Prior stroke or TIA, LA size $> 5.0$ cm (or volume index $\geq 40$ cc/m <sup>2</sup> ), or EF $\leq 35$ . Subjects $< 65$ yrs of age whose only risk factor is hypertension must have a second risk factor or LV hypertrophy to qualify. |                          | Clarification of the inclusion criteria                |
| 3.1 / 22   |                                                                                                                                                                                                                                                                                                                                                                                                                                                                                                                                                                                                                                                                                                                                                        | <b>Patients may have documented atrial flutter in addition to atrial fibrillation and remain eligible</b>                                                                                                                                                                                                                                                                                                                                                                                                                                                                                                                                                                                                                                                                                                                                                                                                | No revision from 3.4     | Wording added for clarification that documented atrial |

|          |                                                                                                                                                                                                                                                                                                                                                     |                                                                                                                                                                                                                                                                                                                                                                                                                                                                                                                                           |                      |                                                                                                                  |
|----------|-----------------------------------------------------------------------------------------------------------------------------------------------------------------------------------------------------------------------------------------------------------------------------------------------------------------------------------------------------|-------------------------------------------------------------------------------------------------------------------------------------------------------------------------------------------------------------------------------------------------------------------------------------------------------------------------------------------------------------------------------------------------------------------------------------------------------------------------------------------------------------------------------------------|----------------------|------------------------------------------------------------------------------------------------------------------|
|          |                                                                                                                                                                                                                                                                                                                                                     | for enrollment.                                                                                                                                                                                                                                                                                                                                                                                                                                                                                                                           |                      | flutter is accepted along with atrial fibrillation                                                               |
| 3.2 / 22 | 1. Patients who have failed $\geq 2$ membrane active anti-arrhythmic drugs at a therapeutic dose due to inefficacy or side effects<br>8. Hypertrophic obstructive cardiomyopathy<br>10. Other mandated anti-arrhythmic drug therapy<br>16. Contraindication to warfarin anti-coagulation<br>20. Participation in any other clinical mortality trial | 1. Patients who have failed $\geq 2$ <u>membrane active</u> anti-arrhythmic drugs at a therapeutic dose due to inefficacy or side effects (Table 5.2.2)<br>8. Hypertrophic obstructive cardiomyopathy (outflow track)<br>10. Other arrhythmias mandating anti-arrhythmic drug therapy (i.e. VT, VF)<br>16. Contraindication to appropriate anti-coagulation therapy<br>20. Participation in any other clinical mortality trial (Participation in other non-mortality trials should be reviewed with the clinical trial management center) | No revision from 3.4 | Clarification of the exclusion criteria                                                                          |
| 3.2 / 23 |                                                                                                                                                                                                                                                                                                                                                     | Planned atrial flutter ablation in combination with the left atrial ablation is not an exclusion.                                                                                                                                                                                                                                                                                                                                                                                                                                         | No revision from 3.4 | Wording added to clarify that planning/performing an atrial flutter ablation is accepted                         |
| 4.3 / 23 | Randomization will be accomplished by telephone using a centralized, IVRS randomization system.                                                                                                                                                                                                                                                     | Randomization will be accomplished by telephone or internet using a centralized, interactive voice and web randomization system (IXRS).                                                                                                                                                                                                                                                                                                                                                                                                   | No revision from 3.4 | To provide clarifications about the randomization system, with additional information about the internet option. |
| 4.4 / 24 | Patients will be followed at 6 and 12-month intervals throughout the trial.                                                                                                                                                                                                                                                                         | Patients will be followed at 6 and 12-month intervals from randomization throughout the                                                                                                                                                                                                                                                                                                                                                                                                                                                   | No revision from 3.4 | To clarify the timing for the follow-up procedures                                                               |

|            |                                                                                                                                                                                                                                                                                                                                                                                                                                                                                                                                                                                                                                                                                                                                                                                                                                                                                                                                                                                                                                                                                                                                                          |                                                                                                                                                                                                                                                                                                                                                                                                                                                                                                                                                                                                                                                                                                                                                                                                                                                                                                                                                                                                                                                                                                                                                                 |                      |                                                                                                                                                                                                                                                                        |
|------------|----------------------------------------------------------------------------------------------------------------------------------------------------------------------------------------------------------------------------------------------------------------------------------------------------------------------------------------------------------------------------------------------------------------------------------------------------------------------------------------------------------------------------------------------------------------------------------------------------------------------------------------------------------------------------------------------------------------------------------------------------------------------------------------------------------------------------------------------------------------------------------------------------------------------------------------------------------------------------------------------------------------------------------------------------------------------------------------------------------------------------------------------------------|-----------------------------------------------------------------------------------------------------------------------------------------------------------------------------------------------------------------------------------------------------------------------------------------------------------------------------------------------------------------------------------------------------------------------------------------------------------------------------------------------------------------------------------------------------------------------------------------------------------------------------------------------------------------------------------------------------------------------------------------------------------------------------------------------------------------------------------------------------------------------------------------------------------------------------------------------------------------------------------------------------------------------------------------------------------------------------------------------------------------------------------------------------------------|----------------------|------------------------------------------------------------------------------------------------------------------------------------------------------------------------------------------------------------------------------------------------------------------------|
| 4.4.1 / 24 | <p>Following a recommended approach consistent with established guidelines, consensus documents, and good clinical practice, a trans-esophageal echocardiographic (TEE) study will be performed within 24 hours prior to ablation in patients with <i>persistent or longstanding persistent AF</i>. The TEE may be performed up to 48 hours before the procedure in patients on continuous warfarin at a therapeutic INR or in those appropriately bridged with intravenous un-fractionated or low molecular weight heparin.</p> <p>In those centers where routine clinical practice includes the performance of pre-ablation CT / MR studies, relevant data from these studies will be collected to serve as a baseline for comparative quantitative LA size, morphology, and function studies, as well as subsequent follow-up PV and esophageal investigations. In addition at those centers, up to 375 patients randomized to drug therapy will be asked to undergo baseline research CT/MR scanning to allow the CABANA study to evaluate and compare atrial structure and function in response to drug or ablative therapy. These drug-treated</p> | <p>trial.</p> <p>Following a recommended approach consistent with established guidelines, consensus documents, and good clinical practice, a trans-esophageal echocardiographic (TEE) study will be performed within 24 hours prior to ablation in patients with <i>persistent or longstanding persistent AF</i>. The TEE may be performed up to 48 hours before the procedure in patients on continuous <b>anticoagulation therapy, such as</b> warfarin at a therapeutic INR or in those appropriately bridged with intravenous un-fractionated or low molecular weight heparin.</p> <p>In those centers where routine clinical practice includes the performance of pre-ablation <b>and post-ablation</b> CT/MR studies, relevant data from these studies will be collected to serve as a baseline for comparative quantitative LA size, morphology, and function studies, as well as subsequent follow-up PV and esophageal investigations. In addition at those centers, up to 375 patients randomized to drug therapy will be asked to undergo <b>one baseline</b> research CT/MR scan <b>prior to initiating</b> therapy. <b>This will</b> allow the</p> | No revision from 3.4 | <p>The wording has been changed to allow the use of other anticoagulant drugs in addition to warfarine. The timing for performing the baseline CT/MR scans for the ablation patients and for the drug therapy patients at the selected centers has been clarified.</p> |
|------------|----------------------------------------------------------------------------------------------------------------------------------------------------------------------------------------------------------------------------------------------------------------------------------------------------------------------------------------------------------------------------------------------------------------------------------------------------------------------------------------------------------------------------------------------------------------------------------------------------------------------------------------------------------------------------------------------------------------------------------------------------------------------------------------------------------------------------------------------------------------------------------------------------------------------------------------------------------------------------------------------------------------------------------------------------------------------------------------------------------------------------------------------------------|-----------------------------------------------------------------------------------------------------------------------------------------------------------------------------------------------------------------------------------------------------------------------------------------------------------------------------------------------------------------------------------------------------------------------------------------------------------------------------------------------------------------------------------------------------------------------------------------------------------------------------------------------------------------------------------------------------------------------------------------------------------------------------------------------------------------------------------------------------------------------------------------------------------------------------------------------------------------------------------------------------------------------------------------------------------------------------------------------------------------------------------------------------------------|----------------------|------------------------------------------------------------------------------------------------------------------------------------------------------------------------------------------------------------------------------------------------------------------------|



|            |                                                                                                                                                                                                                                                                                                                                                                                                                                                                                                                                                                                                                                                      |                                                                                                                                                                                                                                                                                                                                                                                                                                                                                                                                                                                                                                                                                               |                                                                                                                                                                                                                                                                                                                                                                                                                                                                                                                                                            |                                                                                                                                                                                                                                                                                                                 |
|------------|------------------------------------------------------------------------------------------------------------------------------------------------------------------------------------------------------------------------------------------------------------------------------------------------------------------------------------------------------------------------------------------------------------------------------------------------------------------------------------------------------------------------------------------------------------------------------------------------------------------------------------------------------|-----------------------------------------------------------------------------------------------------------------------------------------------------------------------------------------------------------------------------------------------------------------------------------------------------------------------------------------------------------------------------------------------------------------------------------------------------------------------------------------------------------------------------------------------------------------------------------------------------------------------------------------------------------------------------------------------|------------------------------------------------------------------------------------------------------------------------------------------------------------------------------------------------------------------------------------------------------------------------------------------------------------------------------------------------------------------------------------------------------------------------------------------------------------------------------------------------------------------------------------------------------------|-----------------------------------------------------------------------------------------------------------------------------------------------------------------------------------------------------------------------------------------------------------------------------------------------------------------|
|            | <p>patients will be recruited from selected centers that are committed to CT / MR assessment of enrolled drug patients. Since randomization is performed (stratified) within each site, this component of the study will still benefit from the overall study randomization. Optimally, the scans performed in all patients should be within 4 months prior to treatment.</p>                                                                                                                                                                                                                                                                        | <p>CABANA study to evaluate and compare atrial structure and function in response to drug or ablative therapy. These drug-treated patients will be recruited from selected centers that are committed to CT/MR assessment of <del>all</del> enrolled <del>drug</del> patients (<del>both study arms</del>). Since randomization is performed (stratified) within each site, this component of the study will still benefit from the overall study randomization. Optimally, the <del>pre-therapy</del> scans performed in all patients should be within 4 months prior to treatment.</p>                                                                                                      |                                                                                                                                                                                                                                                                                                                                                                                                                                                                                                                                                            |                                                                                                                                                                                                                                                                                                                 |
| 4.4.2 / 25 | <p>CT/MR imaging studies will be performed where clinically indicated or otherwise part of routine clinical care on ablation subjects at baseline, at 3 months post-ablation therapy, and as indicated for PV stenosis management throughout the trial. At sites where baseline and follow-up CT/MR imaging studies are part of routine care for ablation patients, CT/MR imaging studies will also be performed for research purposes on up to 375 drug therapy patients at baseline and 3 months after therapy is fully established (end of blanking period). CT/MR data will be electronically transferred to a server at the Mayo Biomedical</p> | <p>CT/MR imaging studies will be performed where clinically indicated or otherwise part of routine clinical care on ablation subjects <del>at baseline, at 3 months post</del> after ablation therapy (<del>between 90 days post ablation and the 6 month follow-up</del>) and as indicated for PV stenosis management throughout the trial. <del>At sites where baseline and follow up CT/MR imaging studies are part of routine care for ablation patients.</del> The 375 drug therapy patients that received the CT/MR scan prior to initiating drug therapy, <del>imaging studies</del> will also <del>undergo one -be performed for</del> research CT/MR scan after therapy is fully</p> | <p><del>After enrollment, subjects will either receive a single 'CABANA Box' recording system to be used throughout the entire study, or will be examined several times using ambulatory Holter ECG monitoring as generated during the course of routine clinical care as dictated by their attending physician.</del></p> <p>At sites where the 'CABANA Box' has received the appropriate approvals, all patients enrolled will receive a single 'CABANA Box' recording system to be used for both patient activated event monitoring (throughout the</p> | <p>The Medicomp monitoring system will only be utilized at Institutions or within countries where appropriate approvals have been obtained. Routine monitoring based on clinical care will be recorded within the trial database records.</p> <p>The timing for performing post-therapy CT/MR scans for the</p> |

|            |                                                                                                                                                                                                                                                                                                                                                                                                                                                                                                                              |                                                                                                                                                                                                                                                                                                                                                                                                                                                                                                                                                                                                                                                                                                                                                |                                                                                                                                                                                                                                                                                                                                                                                                                                                                                                                                                                              |                                                                                                                                                                                                                                         |
|------------|------------------------------------------------------------------------------------------------------------------------------------------------------------------------------------------------------------------------------------------------------------------------------------------------------------------------------------------------------------------------------------------------------------------------------------------------------------------------------------------------------------------------------|------------------------------------------------------------------------------------------------------------------------------------------------------------------------------------------------------------------------------------------------------------------------------------------------------------------------------------------------------------------------------------------------------------------------------------------------------------------------------------------------------------------------------------------------------------------------------------------------------------------------------------------------------------------------------------------------------------------------------------------------|------------------------------------------------------------------------------------------------------------------------------------------------------------------------------------------------------------------------------------------------------------------------------------------------------------------------------------------------------------------------------------------------------------------------------------------------------------------------------------------------------------------------------------------------------------------------------|-----------------------------------------------------------------------------------------------------------------------------------------------------------------------------------------------------------------------------------------|
|            | <p>Imaging Resource, the CABANA Trial Image Analysis Lab. Scans will be anonymized at the site using a software tool provided by the Imaging Center. Each clinical center will also perform standard site radiology evaluation and assessment of the CT/MR images according to the sites' standard clinical practice.</p> <p>Complete follow-up data will also be obtained at the time of treatment discontinuation, with a crossover in treatment strategy, and at the emergence of any primary or secondary endpoints.</p> | <p>established (<b>between 90 days post drug treatment initiation and the 6 month follow-up</b> <del>(end of blanking period)</del>). CT/MR data will be electronically transferred to a server at the Mayo Biomedical Imaging Resource, the CABANA Trial Image Analysis Lab. Scans will be anonymized at the site using a software tool provided by the Imaging Center. Each clinical center will also perform standard site radiology evaluation and assessment of the CT/MR images according to the sites' standard clinical practice.</p> <p><b>Follow-up data will also be obtained at the time of treatment discontinuation, with a crossover in treatment strategy, and at the emergence of any primary or secondary endpoints.</b></p> | <p>trial), autodetect/autocapture (AD:AC) event monitoring (one 24 hour period/month and full disclosure Holter monitoring (for 96 hours every 6 months) throughout the entire study. Fingertip recordings as well as AD:AC recordings can be transferred via telephone download from the patient's home to the CABANA monitoring center. Holter recordings will require downloading of information at the enrolling site for data transfer to the CABANA monitoring center. All recordings will be made available to the enrolling center for use in clinical practice.</p> | <p>ablation patients and for the drug therapy patients at the selected centers has been clarified.</p>                                                                                                                                  |
| 5.2.3 / 28 |                                                                                                                                                                                                                                                                                                                                                                                                                                                                                                                              | <p><b>Drugs which have been approved by appropriate regulatory agencies outside of the United States may be used within that jurisdiction.</b></p>                                                                                                                                                                                                                                                                                                                                                                                                                                                                                                                                                                                             | No revision from 3.4                                                                                                                                                                                                                                                                                                                                                                                                                                                                                                                                                         | <p>To explain that the protocol allows the use of new drugs which have been approved by appropriate regulatory agencies outside of the United States within the respective jurisdictions, as a chief aim of the trial is to provide</p> |

|            |                                                                                                                                                                                                                                                                                                                                                                                                                                                                                   |                                                                                                                                                                                                                                                                                                                                                                                                                                                                                                                                                                                                                                                                                                                                                                                                                                  |                      |                                                                                                                                                                             |
|------------|-----------------------------------------------------------------------------------------------------------------------------------------------------------------------------------------------------------------------------------------------------------------------------------------------------------------------------------------------------------------------------------------------------------------------------------------------------------------------------------|----------------------------------------------------------------------------------------------------------------------------------------------------------------------------------------------------------------------------------------------------------------------------------------------------------------------------------------------------------------------------------------------------------------------------------------------------------------------------------------------------------------------------------------------------------------------------------------------------------------------------------------------------------------------------------------------------------------------------------------------------------------------------------------------------------------------------------|----------------------|-----------------------------------------------------------------------------------------------------------------------------------------------------------------------------|
|            |                                                                                                                                                                                                                                                                                                                                                                                                                                                                                   |                                                                                                                                                                                                                                                                                                                                                                                                                                                                                                                                                                                                                                                                                                                                                                                                                                  |                      | relevant, up-to-date information for guiding drug and ablative therapy for AF.                                                                                              |
| 5.2.6 / 28 | During follow-up, drug arm patients with recurrences may be treated with additional anti-arrhythmic drugs or alternative rate control agents. Ablative intervention is strongly discouraged. Of note, most patients included to date in single center trials were treated for over one year before undergoing ablation. Patients will be fully informed of this at the time of the consent process. <b>Crossovers must be approved by the CABANA Trial Administrative Center.</b> | During follow-up, drug arm patients with recurrences may be treated with additional anti-arrhythmic drugs or alternative rate control agents. Of note, most patients included to date in single center trials were treated for over one year before undergoing ablation. <b>Thus, it is anticipated that most patients will be treated for at least 12 months in the drug therapy arm and that patients will be fully informed of this at the time of the consent process. Cross over ablative intervention is strongly discouraged. Crossovers must be approved by the CABANA Trial Administrative Center. Before approval is granted for a patient randomized to drug therapy to be crossed over to ablation, sites will be required to provide rationale and documentation that drug therapy options have been exhausted.</b> | No revision from 3.4 | To reinforce that crossover of the patients from the drug therapy arm to ablation therapy is discouraged and subject of approval by the CABANA Trial Administrative Center. |
| 5.3.3 / 29 |                                                                                                                                                                                                                                                                                                                                                                                                                                                                                   | <b>Catheters which have been approved by appropriate regulatory agencies outside of the United States may be used within that jurisdiction.</b>                                                                                                                                                                                                                                                                                                                                                                                                                                                                                                                                                                                                                                                                                  | No revision from 3.4 | To clarify catheters which have been approved by appropriate regulatory agencies                                                                                            |

|            |                                                                                                                                                                                                                                                                                                                                                                                                                                                                                                                                    |                                                                                                                                                                                                                                                                                                                                                                                                                                                                                                                                                                                                                                                             |                      |                                                                                                                                                                   |
|------------|------------------------------------------------------------------------------------------------------------------------------------------------------------------------------------------------------------------------------------------------------------------------------------------------------------------------------------------------------------------------------------------------------------------------------------------------------------------------------------------------------------------------------------|-------------------------------------------------------------------------------------------------------------------------------------------------------------------------------------------------------------------------------------------------------------------------------------------------------------------------------------------------------------------------------------------------------------------------------------------------------------------------------------------------------------------------------------------------------------------------------------------------------------------------------------------------------------|----------------------|-------------------------------------------------------------------------------------------------------------------------------------------------------------------|
|            |                                                                                                                                                                                                                                                                                                                                                                                                                                                                                                                                    |                                                                                                                                                                                                                                                                                                                                                                                                                                                                                                                                                                                                                                                             |                      | outside of the United States may be used within that jurisdiction, even if they are not listed in the protocol.                                                   |
| 5.4.1 / 31 | Patients with risk factors for CVA or peripheral thromboembolic events at the time of enrollment, treated with rate control agents alone, will remain on active anticoagulation therapy with warfarin throughout the duration of the trial [92]. Unlike the AFFIRM trial, patients receiving rhythm control therapy will also be required to receive warfarin anticoagulation for the duration of the trial. In both cases, target INRs of 2 to 3 will be required, unless higher INRs are mandated because of underlying disease. | Patients with risk factors for CVA or peripheral thromboembolic events at the time of enrollment, treated with rate control agents alone, will remain on active anticoagulation therapy <del>with (warfarin, dabigatran)</del> throughout the duration of the trial [92]. Unlike the AFFIRM trial, patients receiving rhythm control therapy will also be required to receive <del>warfarin adequate</del> anticoagulation ( <del>warfarin, dabigatran</del> ) for the duration of the trial. In <del>both cases the use of warfarin therapy</del> , target INRs of 2 to 3 will be required, unless higher INRs are mandated because of underlying disease. |                      | Changes have been implemented to allow the use of other anticoagulation drugs (dabigatran).                                                                       |
| 5.4.2 / 31 | Anticoagulation before, during, and after the ablative intervention will follow the guidelines of the AF Ablation Consensus Document [50]. Prior to the ablative intervention, patients with persistent and long-standing persistent AF should receive at least one month of warfarin anticoagulation (INRs: 2-3), or                                                                                                                                                                                                              | Anticoagulation before, during, and after the ablative intervention will follow the guidelines of the AF Ablation Consensus Document [50]. Prior to the ablative intervention, patients with persistent and long-standing persistent AF should receive <del>adequate anticoagulation (i.e.</del> at least one month of warfarin                                                                                                                                                                                                                                                                                                                             | No revision from 3.4 | Changes have been implemented to allow the use of other anticoagulation drugs (dabigatran), in accordance with the recent guidelines of the AF Ablation Consensus |

|  |                                                                                                                                                                                                                                                                                                                                                                                                                                                                                                                                                                                                                                                                                                                                                                                                                                                                                                                                                                                                                                                                                                                                                                                                                                          |                                                                                                                                                                                                                                                                                                                                                                                                                                                                                                                                                                                                                                                                                                                                                                                                                                                                                                                                                                                                                                                                                                                                                                                                      |                  |
|--|------------------------------------------------------------------------------------------------------------------------------------------------------------------------------------------------------------------------------------------------------------------------------------------------------------------------------------------------------------------------------------------------------------------------------------------------------------------------------------------------------------------------------------------------------------------------------------------------------------------------------------------------------------------------------------------------------------------------------------------------------------------------------------------------------------------------------------------------------------------------------------------------------------------------------------------------------------------------------------------------------------------------------------------------------------------------------------------------------------------------------------------------------------------------------------------------------------------------------------------|------------------------------------------------------------------------------------------------------------------------------------------------------------------------------------------------------------------------------------------------------------------------------------------------------------------------------------------------------------------------------------------------------------------------------------------------------------------------------------------------------------------------------------------------------------------------------------------------------------------------------------------------------------------------------------------------------------------------------------------------------------------------------------------------------------------------------------------------------------------------------------------------------------------------------------------------------------------------------------------------------------------------------------------------------------------------------------------------------------------------------------------------------------------------------------------------------|------------------|
|  | <p>have a TEE excluding intra-atrial thrombus at the time of the intervention. During the ablative intervention, maintaining an ACT between 300 and 400 seconds is strongly recommended. Following the ablative intervention, patients will be started on IV heparin or subcutaneous injections of low molecular weight heparin beginning 4 to 6 hours after all sheaths are removed, and warfarin anti-coagulation reinstated the evening of the intervention. Thereafter, low molecular weight heparin is to be maintained until standard dose warfarin achieves a target INR of 2 to 3, unless the ablation was performed at a therapeutic INR in patients maintained on warfarin through the ablation. Three to six months after ablation, warfarin may be replaced by full dose aspirin in patients with a CHADs score <math>\leq</math> 1. This would include patients with hypertension without hypertrophy, or those &lt;65 years of age, providing 1) atrial size and function are normal and 2) there is no symptomatic or asymptomatic AF by standard or full-disclosure monitoring. In those patients with a CHADs score <math>\geq</math>2, warfarin is to be continued throughout the trial. Randomization of warfarin</p> | <p>anticoagulation (INRs: 2-3)), or have a TEE excluding intra-atrial thrombus at the time of the intervention. During the ablative intervention, maintaining an ACT between 300 and 400 seconds is strongly recommended. Following the ablative intervention, patients will be started on IV heparin or subcutaneous injections of low molecular weight heparin beginning 4 to 6 hours after all sheaths are removed, and <b>warfarin appropriate</b> anticoagulation reinstated the evening of the intervention. Thereafter, low molecular weight heparin is to be maintained until <b>anticoagulated appropriately</b> or standard dose warfarin achieves a target INR of 2 to 3, unless the ablation was performed at a therapeutic INR in patients maintained on warfarin through the ablation. <b>One month following the ablation, Dabigatran may be substituted for warfarin, following recently written guidelines.</b> Three to six months after ablation, warfarin may be replaced by full dose aspirin in patients with a CHADs score <math>\leq</math> 1. This would include patients with hypertension without hypertrophy, or those &lt;65 years of age, providing 1) atrial size</p> | <p>Document.</p> |
|--|------------------------------------------------------------------------------------------------------------------------------------------------------------------------------------------------------------------------------------------------------------------------------------------------------------------------------------------------------------------------------------------------------------------------------------------------------------------------------------------------------------------------------------------------------------------------------------------------------------------------------------------------------------------------------------------------------------------------------------------------------------------------------------------------------------------------------------------------------------------------------------------------------------------------------------------------------------------------------------------------------------------------------------------------------------------------------------------------------------------------------------------------------------------------------------------------------------------------------------------|------------------------------------------------------------------------------------------------------------------------------------------------------------------------------------------------------------------------------------------------------------------------------------------------------------------------------------------------------------------------------------------------------------------------------------------------------------------------------------------------------------------------------------------------------------------------------------------------------------------------------------------------------------------------------------------------------------------------------------------------------------------------------------------------------------------------------------------------------------------------------------------------------------------------------------------------------------------------------------------------------------------------------------------------------------------------------------------------------------------------------------------------------------------------------------------------------|------------------|

|            |                                                                                                                                                                                                                                                                                                                                                                                                                                                                                                                                                                                                                                 |                                                                                                                                                                                                                                                                                                                                                                                                                                                                                                                                                                                                                                                                                                                                                                                                                                                                                                                     |                      |                                                                                                    |
|------------|---------------------------------------------------------------------------------------------------------------------------------------------------------------------------------------------------------------------------------------------------------------------------------------------------------------------------------------------------------------------------------------------------------------------------------------------------------------------------------------------------------------------------------------------------------------------------------------------------------------------------------|---------------------------------------------------------------------------------------------------------------------------------------------------------------------------------------------------------------------------------------------------------------------------------------------------------------------------------------------------------------------------------------------------------------------------------------------------------------------------------------------------------------------------------------------------------------------------------------------------------------------------------------------------------------------------------------------------------------------------------------------------------------------------------------------------------------------------------------------------------------------------------------------------------------------|----------------------|----------------------------------------------------------------------------------------------------|
|            | <p>discontinuation is precluded by the low post-ablation stroke rates that would require at least 10,000 patients for detecting differences in stroke prevalence. Nevertheless, the characteristics, follow-up monitoring results, and long-term anticoagulation status of ablation patients will be compared to descriptively identify predictors of events and profiles of patients at high risk for warfarin discontinuation. The utility of trans-telephonic, auto-detection / full disclosure, and Holter monitoring, as a future aid in the decision to discontinue anticoagulation will also be critically examined.</p> | <p>and function are normal and 2) there is no symptomatic or asymptomatic AF by standard or full-disclosure monitoring. In those patients with a CHADs score <math>\geq 2</math>, adequate anticoagulation warfarin is to be continued throughout the trial. Randomization of warfarin discontinuation is precluded by the low post-ablation stroke rates that would require at least 10,000 patients for detecting differences in stroke prevalence. Nevertheless, the characteristics, follow-up monitoring results, and long-term anticoagulation status of ablation patients will be compared to descriptively identify predictors of events and profiles of patients at high risk for warfarin discontinuation. The utility of trans-telephonic, auto-detection / full disclosure, and Holter monitoring, as a future aid in the decision to discontinue anticoagulation will also be critically examined.</p> |                      |                                                                                                    |
| 5.4.3 / 31 | <p>It is likely during the course of the trial that newer antithrombotic therapies non-inferior to warfarin will be approved. These agents may be used as replacement therapy for warfarin on approval of Innovative Antithrombotic Therapies/Executive Committees.</p>                                                                                                                                                                                                                                                                                                                                                         | <p>It is likely during the course of the trial that newer antithrombotic therapies non-inferior to warfarin or dabigatran will be approved. These agents may be used as replacement therapy for warfarin on approval of Innovative Antithrombotic Therapies/Executive</p>                                                                                                                                                                                                                                                                                                                                                                                                                                                                                                                                                                                                                                           | No revision from 3.4 | <p>Changes have been implemented to allow the use of other anticoagulation drugs (dabigatran).</p> |

|            |                                                                                                                                                                                                                                                                                                                                                                                                                                                                                                                                                     | Committees.                                                                                                                                                                                                                                                                                                                                                                                                                                                                                                                                                                                                                                                |                      |                                                                                                                                      |
|------------|-----------------------------------------------------------------------------------------------------------------------------------------------------------------------------------------------------------------------------------------------------------------------------------------------------------------------------------------------------------------------------------------------------------------------------------------------------------------------------------------------------------------------------------------------------|------------------------------------------------------------------------------------------------------------------------------------------------------------------------------------------------------------------------------------------------------------------------------------------------------------------------------------------------------------------------------------------------------------------------------------------------------------------------------------------------------------------------------------------------------------------------------------------------------------------------------------------------------------|----------------------|--------------------------------------------------------------------------------------------------------------------------------------|
| 5.4.4 / 31 | Specific items left to the investigators discretion include: 1) specific choice of rate control vs. rhythm control drug therapy and specific drugs to be used; 2) hospitalization to initiate anti-arrhythmic drug therapy; 3) choice of TEE guided direct current cardioversion (DCCV) vs. DCCV after 4 weeks of warfarin to an INR of 2-3; 4) pre-ablation TEE assessment in patients with simple paroxysmal AF and hypertension without hypertrophy; 5) continuation of warfarin to maintain a therapeutic INR at the time of catheter ablation. | Specific items left to the investigators discretion include: 1) specific choice of rate control vs. rhythm control drug therapy and specific drugs to be used; 2) hospitalization to initiate anti-arrhythmic drug therapy; 3) choice of TEE guided direct current cardioversion (DCCV) vs. DCCV after 4 weeks of <b>appropriate anticoagulation therapy, such as</b> warfarin to an INR of 2-3; 4) pre-ablation TEE assessment in patients with simple paroxysmal AF and hypertension without hypertrophy; 5) continuation of warfarin to maintain a therapeutic INR at the time of catheter ablation; <b>6) selection of warfarin versus dabigatran.</b> | No revision from 3.4 | Changes have been implemented to allow the use of other anticoagulation drugs (dabigatran).                                          |
| 6.2 / 32   | While hospitalization for AF in both treatment arms will be carefully tracked and compared, it will be considered as an “ <i>AF recurrence</i> ” and counted against efficacy, not safety. Therefore, AF recurrence and/or worsening of AF does not need to be reported as an adverse event.                                                                                                                                                                                                                                                        | While hospitalization for AF in both treatment arms will be carefully tracked and compared, it will be considered as an “ <i>AF recurrence</i> ” and counted against efficacy, not safety. Therefore, AF recurrence and/or worsening of AF <del>does</del> <b>should not</b> be reported as an adverse event.                                                                                                                                                                                                                                                                                                                                              | No revision from 3.4 | Change implemented to increase the clarity of the text.                                                                              |
| 7.0 / 32   | An adverse event (AE) will be considered present if 1) there are untoward signs, symptoms, illnesses, or other medical events that develop or worsen in severity during the course of the study, 2) they are clinically                                                                                                                                                                                                                                                                                                                             | An adverse event (AE) will be considered present if 1) there are untoward signs, symptoms, illnesses, or other medical events that develop or worsen in severity during the course of the study, 2) they are clinically                                                                                                                                                                                                                                                                                                                                                                                                                                    | No revision from 3.4 | The text had been updated to provide additional guidance and clarifications to the investigators for the assessment and reporting of |

|          |                                                                                                                                                                                                                                                                                                                                                                                                                                                                                                                                                                                              |                                                                                                                                                                                                                                                                                                                                                                                                                                                                                                                                                                                                                                                                                                            |                      |                                                                                                                                                             |
|----------|----------------------------------------------------------------------------------------------------------------------------------------------------------------------------------------------------------------------------------------------------------------------------------------------------------------------------------------------------------------------------------------------------------------------------------------------------------------------------------------------------------------------------------------------------------------------------------------------|------------------------------------------------------------------------------------------------------------------------------------------------------------------------------------------------------------------------------------------------------------------------------------------------------------------------------------------------------------------------------------------------------------------------------------------------------------------------------------------------------------------------------------------------------------------------------------------------------------------------------------------------------------------------------------------------------------|----------------------|-------------------------------------------------------------------------------------------------------------------------------------------------------------|
|          | <p>relevant and if they are clinically related to the study. Note: Disease, signs symptoms, and or laboratory abnormalities already existing at randomization are not considered adverse events unless they represent an intensity or frequency exacerbation. Surgical procedures themselves are not adverse events; they are therapeutic measures for conditions that require surgery. The condition for which the surgery is required may be an adverse event. Surgical procedures planned prior to randomization and the conditions leading to these measures are not adverse events.</p> | <p>relevant <b>and</b> if they are clinically related to the study. Note: Disease, signs symptoms, and or laboratory abnormalities already existing at randomization are not considered adverse events unless they represent an intensity or frequency exacerbation. <b>An adverse event designation should reflect the reason for a diagnosis or abnormal measurement. Surgical procedures themselves are not adverse events; they are therapeutic measures for conditions that require surgery. The condition for which the surgery is required may be an adverse event. Surgical</b> Procedures planned prior to randomization and the conditions leading to these measures are not adverse events.</p> |                      | <p>adverse events.</p>                                                                                                                                      |
| 7.0 / 33 | <p>The DCRI will evaluate any safety information that is spontaneously reported in the time frame specified in the protocol. For each subject, adverse events occurring after randomization must be recorded on the applicable Adverse Events page(s) in the electronic Case Report Form (eCRF). Recording should be done in a concise manner using standard, acceptable medical terms. The adverse event recorded should</p>                                                                                                                                                                | <p>The DCRI will evaluate any safety information that is spontaneously reported in the time frame specified in the protocol. For each subject, adverse events occurring after randomization must be recorded on the applicable Adverse Events page(s) in the electronic Case Report Form (eCRF). Recording should be done in a concise manner using standard, acceptable medical terms. The adverse event</p>                                                                                                                                                                                                                                                                                              | No revision from 3.4 | <p>The text had been updated to provide additional guidance and clarifications to the investigators for the assessment and reporting of adverse events.</p> |



|            |                                                                                                                                                                                                                                                                                                                                                                                                                 |                                                                                                                                                                                                                                                                                                                                                                                                                                                                                                                                                                                                                                                                                                                                                                                                       |                      |                                                                                                                                                             |
|------------|-----------------------------------------------------------------------------------------------------------------------------------------------------------------------------------------------------------------------------------------------------------------------------------------------------------------------------------------------------------------------------------------------------------------|-------------------------------------------------------------------------------------------------------------------------------------------------------------------------------------------------------------------------------------------------------------------------------------------------------------------------------------------------------------------------------------------------------------------------------------------------------------------------------------------------------------------------------------------------------------------------------------------------------------------------------------------------------------------------------------------------------------------------------------------------------------------------------------------------------|----------------------|-------------------------------------------------------------------------------------------------------------------------------------------------------------|
|            | <p>not be a procedure or a clinical measurement (i.e., a laboratory value or vital sign) but should reflect the reason for the procedure or the diagnosis based on the abnormal measurement. It is the responsibility of the Principal Investigator to oversee the safety of the study at his/her site. This safety monitoring will include careful assessment and appropriate reporting of adverse events.</p> | <p>recorded should not be a procedure or a clinical measurement (i.e., a laboratory value or vital sign) but should reflect the reason for the procedure or the diagnosis based on the abnormal measurement. It is the responsibility of the Principal Investigator to oversee the safety of the <b>patients enrolled in the study</b> at his/her site. <b>The responsibility for safety oversight includes careful assessment and appropriate reporting of adverse events. The primary mechanism for reporting adverse events in CABANA is for study personnel at the clinical sites to enter the relevant information and the details and description of each event using the adverse event forms that are part of the InForm electronic data capture (EDC) system being used in the trial.</b></p> |                      |                                                                                                                                                             |
| 7.1.1 / 33 | <p>An anticipated event is one that has been previously identified in previous studies, published literature, or product labeling to be related to the disease state or therapies. A listing of 'Anticipated' events can be found in Appendix A. An unanticipated adverse event is any occurring that has not been previously reported (see</p>                                                                 | <p>An anticipated event is one that has been previously identified in previous studies, published literature, or product labeling to be related to the disease state or therapies. A listing of '<b>anticipated/expected</b>' events can be found in Appendix A. An unanticipated/<b>unexpected</b> adverse event is any occurring that has not been reported <b>in</b></p>                                                                                                                                                                                                                                                                                                                                                                                                                           | No revision from 3.4 | <p>The text had been updated to provide additional guidance and clarifications to the investigators for the assessment and reporting of adverse events.</p> |

|            |                                                                                                                                                                                                                                                                                                                                                                                                                                                                                                                                                                                                                |                                                                                                                                                                                                                                                                                                                                                                                                                                                                                                                                                                                                                                                        |                      |                                                                                                                           |
|------------|----------------------------------------------------------------------------------------------------------------------------------------------------------------------------------------------------------------------------------------------------------------------------------------------------------------------------------------------------------------------------------------------------------------------------------------------------------------------------------------------------------------------------------------------------------------------------------------------------------------|--------------------------------------------------------------------------------------------------------------------------------------------------------------------------------------------------------------------------------------------------------------------------------------------------------------------------------------------------------------------------------------------------------------------------------------------------------------------------------------------------------------------------------------------------------------------------------------------------------------------------------------------------------|----------------------|---------------------------------------------------------------------------------------------------------------------------|
|            | appendix A).                                                                                                                                                                                                                                                                                                                                                                                                                                                                                                                                                                                                   | <b>previous studies, published literature, or product labeling</b> (see appendix A).                                                                                                                                                                                                                                                                                                                                                                                                                                                                                                                                                                   |                      |                                                                                                                           |
| 7.1.2 / 33 | c. 23 hour hospitalizations.                                                                                                                                                                                                                                                                                                                                                                                                                                                                                                                                                                                   | c. 23 hour hospitalizations <b>(observation)</b> .                                                                                                                                                                                                                                                                                                                                                                                                                                                                                                                                                                                                     | No revision from 3.4 |                                                                                                                           |
| 7.1.3 / 34 | 1. <b>Mild:</b> Any event that results in minimal transient impairment of a body function and does not threaten damage to a body structure, and/or does not require intervention other than monitoring.                                                                                                                                                                                                                                                                                                                                                                                                        | 1. <b>Mild:</b> Any event that results in minimal transient impairment of a body function and does not threaten damage to a body structure, and/or does not require intervention other than monitoring <b>(easily tolerated)</b> .                                                                                                                                                                                                                                                                                                                                                                                                                     | No revision from 3.4 | The text had been updated to provide additional clarifications to the investigators for the assessment of adverse events. |
| 7.1.4 / 34 | 1. <b>Definitely related:</b> reasonable temporal relationship to study therapy or device<br>a. follows a known response pattern (e.g., study drug, treatment or device is known to cause this AE)<br>b. there is no alternative etiology or explanation for the event<br>2. <b>Probably related:</b> reasonable temporal relationship<br>a. follows a suspected response pattern<br>b. no evidence for a more likely alternative etiology though could be unrelated<br>3. <b>Possibly related:</b> reasonable temporal relationship<br>a. equivocal evidence that the event is study related as opposed to an | <b>The International Council of Harmonization (ICH) Guidelines (1995) indicate that “reasonable causal relationship” means that “there are facts [evidence] or arguments to suggest a causal relationship.” The causality assessment must be made by the investigator based on information available at the time that the adverse event eCRF is completed. The initial causality assessment may be revised as new information becomes available.</b><br>1. <b>Definitely related: there is a</b> reasonable temporal relationship to study therapy or device<br>a. follows a known response pattern (e.g., study drug, treatment or device is known to | No revision from 3.4 | Change implemented to increase the clarity of the text.                                                                   |

|  |                                                                                                                                                                                                                                                                                                                                                                                                                                                                                                                                                                                                                                                                                                                                                                                                                                                                                                                                                                                               |                                                                                                                                                                                                                                                                                                                                                                                                                                                                                                                                                                                                                                                                                                                                                                                                                                                                                                                                                                                                                         |  |  |
|--|-----------------------------------------------------------------------------------------------------------------------------------------------------------------------------------------------------------------------------------------------------------------------------------------------------------------------------------------------------------------------------------------------------------------------------------------------------------------------------------------------------------------------------------------------------------------------------------------------------------------------------------------------------------------------------------------------------------------------------------------------------------------------------------------------------------------------------------------------------------------------------------------------------------------------------------------------------------------------------------------------|-------------------------------------------------------------------------------------------------------------------------------------------------------------------------------------------------------------------------------------------------------------------------------------------------------------------------------------------------------------------------------------------------------------------------------------------------------------------------------------------------------------------------------------------------------------------------------------------------------------------------------------------------------------------------------------------------------------------------------------------------------------------------------------------------------------------------------------------------------------------------------------------------------------------------------------------------------------------------------------------------------------------------|--|--|
|  | <p>alternative etiology</p> <p>4. <b>Probably not related:</b> does not have a reasonable temporal relationship OR</p> <p>a. good evidence for a more likely alternative etiology</p> <p>5. <b>Not related:</b> does not have a temporal relationship OR</p> <p>a. clear and compelling evidence that the event is due to an alternative etiology</p> <p>b. ICH guidelines (1995) clarify “reasonable causal relationship” to mean that “there are facts [evidence] or arguments to suggest a causal relationship.” The causality assessment must be made by the investigator based on information available at the time that the adverse event eCRF is completed. The initial causality assessment may be revised as new information becomes available.</p> <p>All adverse events, serious and non-serious, that occur between the time of randomization and the last study-related procedure/visit will be followed until resolution, stabilization, or until the last subject enrolled</p> | <p>cause this AE)</p> <p>b. there is no alternative etiology or explanation for the event</p> <p>2. <b>Probably related: there is a</b> reasonable temporal relationship <b>which</b></p> <p>a. follows a suspected response pattern</p> <p>b. no evidence for a more likely alternative etiology though could be unrelated</p> <p>3. <b>Possibly related: there is a</b> reasonable temporal relationship <b>but</b></p> <p>a. equivocal evidence that the event is study related as opposed to an alternative etiology</p> <p>4. <b>Probably not related: there is</b> not a reasonable temporal relationship OR</p> <p>a. good evidence for a more likely alternative etiology</p> <p>5. <b>Not related: there is</b> not <b>have</b> a temporal relationship OR</p> <p>a. clear and compelling evidence that the event is due to an alternative etiology</p> <p><del>b. ICH guidelines (1995) clarify “reasonable causal relationship” to mean that “there are facts [evidence] or arguments to suggest a</del></p> |  |  |
|--|-----------------------------------------------------------------------------------------------------------------------------------------------------------------------------------------------------------------------------------------------------------------------------------------------------------------------------------------------------------------------------------------------------------------------------------------------------------------------------------------------------------------------------------------------------------------------------------------------------------------------------------------------------------------------------------------------------------------------------------------------------------------------------------------------------------------------------------------------------------------------------------------------------------------------------------------------------------------------------------------------|-------------------------------------------------------------------------------------------------------------------------------------------------------------------------------------------------------------------------------------------------------------------------------------------------------------------------------------------------------------------------------------------------------------------------------------------------------------------------------------------------------------------------------------------------------------------------------------------------------------------------------------------------------------------------------------------------------------------------------------------------------------------------------------------------------------------------------------------------------------------------------------------------------------------------------------------------------------------------------------------------------------------------|--|--|

|          |                                                                                                                                                                                                                                                                                                                                                                                                                                                                                                                                                                     |                                                                                                                                                                                                                                                                                                                                                                                                                                                                                                                                                                                                                                                                                                                                                                                    |                      |                                                                                                                                                             |
|----------|---------------------------------------------------------------------------------------------------------------------------------------------------------------------------------------------------------------------------------------------------------------------------------------------------------------------------------------------------------------------------------------------------------------------------------------------------------------------------------------------------------------------------------------------------------------------|------------------------------------------------------------------------------------------------------------------------------------------------------------------------------------------------------------------------------------------------------------------------------------------------------------------------------------------------------------------------------------------------------------------------------------------------------------------------------------------------------------------------------------------------------------------------------------------------------------------------------------------------------------------------------------------------------------------------------------------------------------------------------------|----------------------|-------------------------------------------------------------------------------------------------------------------------------------------------------------|
|          | <p>completes the follow-up phase of the trial. Adverse events for subjects who discontinue study participation at any time during the study should be collected/reported through at least the time of discontinuation. In addition, required Institutional reporting structure will be followed and/or as described in this protocol.</p>                                                                                                                                                                                                                           | <p><del>causal relationship.” The causality assessment must be made by the investigator based on information available at the time that the adverse event eCRF is completed. The initial causality assessment may be revised as new information becomes available.</del></p>                                                                                                                                                                                                                                                                                                                                                                                                                                                                                                       |                      |                                                                                                                                                             |
| 7.2 / 35 | <p>All adverse events, serious and non-serious, that occur between the time of randomization and the last study-related procedure/visit will be followed until resolution, stabilization, or until the last subject enrolled completes the follow-up phase of the trial. Adverse events for subjects who discontinue study participation at any time during the study should be collected/reported through at least the time of discontinuation. In addition, required Institutional reporting structure will be followed and/or as described in this protocol.</p> | <p>The goal is to have an adverse event reporting process that is (a) clear and simple for site investigators and study coordinators to understand and implement, (b) satisfies all regulatory reporting requirements, (c) eliminates any duplication in data collection and reporting, and (d) has a balanced focus on both the drug and ablation arms of the trial.</p> <p>All <del>related</del> adverse events, serious and non-serious, that occur between the time of randomization and the last study-related procedure/visit will be followed until resolution, stabilization, or <del>until the last subject enrolled completes the follow-up phase of the</del> trial completion. Adverse events for subjects who discontinue study participation at any time during</p> | No revision from 3.4 | <p>The text had been updated to provide additional guidance and clarifications to the investigators for the assessment and reporting of adverse events.</p> |

|            |                                                                                                                                                                                                                                                                                                                                                                                                      |                                                                                                                                                                                                                                                                                                                                                                                                                                              |                      |                                                                                                                     |
|------------|------------------------------------------------------------------------------------------------------------------------------------------------------------------------------------------------------------------------------------------------------------------------------------------------------------------------------------------------------------------------------------------------------|----------------------------------------------------------------------------------------------------------------------------------------------------------------------------------------------------------------------------------------------------------------------------------------------------------------------------------------------------------------------------------------------------------------------------------------------|----------------------|---------------------------------------------------------------------------------------------------------------------|
|            |                                                                                                                                                                                                                                                                                                                                                                                                      | the study should be collected/reported through at least the time of discontinuation. In addition, the required Institutional reporting structure will be followed and/or as described in this protocol.                                                                                                                                                                                                                                      |                      |                                                                                                                     |
| 7.3 / 35   | Regardless of causality, the investigator will record all serious adverse events occurring between randomization and the last study-related procedure/visit or completion of the trial into the electronic database within 24 hours of knowledge of the event. DCRI will report all unanticipated adverse device effects (UADE) to Mayo Clinic and the DSMB chair within 2 business days of receipt. | Regardless of causality, the investigator will record all serious adverse events occurring between randomization and the last study-related procedure/visit or completion of the trial into the electronic database within 24 hours of knowledge of the event. DCRI will report all unanticipated/ <b>unexpected</b> adverse <b>events</b> to Mayo Clinic and the DSMB chair within 2 business days of receipt.                              | No revision from 3.4 | Change implemented to increase the clarity of the text.                                                             |
| 7.4 / 35   | Specified events as listed below that meet serious criteria (see section 7.1.2 of the protocol) are unanticipated and probably/definitely related, if occurring between randomization through completion of follow-up (end of trial) require <b>expedited</b> reporting by the DCRI and in turn to the appropriate regulatory agencies.                                                              | Specified events as listed below that meet <b>serious</b> criteria (see section 7.1.2 of the protocol), <b>related (possibly/probably/definitely) to either study drug or the ablation device or procedure, and are unanticipated/unexpected</b> if occurring between randomization through completion of follow-up (end of trial) require <b>expedited</b> reporting <b>to</b> the DCRI and in turn to the appropriate regulatory agencies. | No revision from 3.4 | The text had been updated to provide additional guidance to the investigators for the assessment of adverse events. |
| 7.4.1 / 35 | 1. Unanticipated ablation procedure related events                                                                                                                                                                                                                                                                                                                                                   | <b>1. Unexpected, SAE related to study drug</b>                                                                                                                                                                                                                                                                                                                                                                                              | No revision from 3.4 | The text had been updated to clarify                                                                                |

|          |                                                                                                                                                                                                                                                                                                                                                                                                                                                                                                                                                                                               |                                                                                                                                                                                                                                                                                                                                                                                                                                                                                                                                                                                                       |                      |                                                                                                                                          |
|----------|-----------------------------------------------------------------------------------------------------------------------------------------------------------------------------------------------------------------------------------------------------------------------------------------------------------------------------------------------------------------------------------------------------------------------------------------------------------------------------------------------------------------------------------------------------------------------------------------------|-------------------------------------------------------------------------------------------------------------------------------------------------------------------------------------------------------------------------------------------------------------------------------------------------------------------------------------------------------------------------------------------------------------------------------------------------------------------------------------------------------------------------------------------------------------------------------------------------------|----------------------|------------------------------------------------------------------------------------------------------------------------------------------|
|          | <p>2. Unanticipated Adverse Device Effect events (UADEs)</p> <p>3. Device Failures or Malfunctions</p> <p>4. <b>Events of Interest (EOI):</b><br/>Ablation therapy or Procedure related events (index and/or follow-up): All events that resulted in death, myocardial perforation with tamponade requiring intervention, esophageal atrial fistula, and/or severe pulmonary vein stenosis that were life threatening or classified as severe in nature.</p>                                                                                                                                  | <p>2. Unanticipated ablation procedure related events</p> <p>3. Unanticipated Adverse Device Effect (UADEs)</p> <p>4. Device failures or malfunctions</p> <p>5. <b>Events of Interest (EOI):</b><br/><b>Drug or ablation therapy or ablation procedure</b> related events (index and/or follow-up): All events that resulted in death, <b>pro-arrhythmic events</b>, myocardial perforation <b>with /</b> tamponade requiring intervention, esophageal atrial fistula, and/or severe pulmonary vein stenosis that were life threatening or classified as severe in nature.</p>                        |                      | <p>that unexpected adverse events related to study drug also require expedited reporting.</p>                                            |
| 7.5 / 36 | <p>Expedited Events must be entered on the appropriate eCRF pages or if the electronic database is unavailable reported on an <i>Expedited Event Form</i> and faxed to DCRI Safety Surveillance within 24 hours of knowledge of the event. When available, the event must be entered into the electronic data base.</p> <p><b>DCRI Safety Surveillance</b><br/>Telephone: 1-919-668-8624<br/>Toll Free: 1-866-668-7799<br/>Fax: 1-919-668-7138<br/>Toll Free Fax: 1-866-668-7138</p> <p><b>Safety Surveillance Medical Reviewer</b><br/>Lynda Szczech, M.D.<br/>Telephone: 1-919-668-8918</p> | <p>Expedited Events must be entered on the appropriate eCRF pages or if the electronic database is unavailable <b>for more than 24 hours, the event would be</b> reported on an <i>Expedited Event Form</i> and faxed/<b>emailed</b> to DCRI Safety Surveillance within 24 hours of knowledge of the event. When available, the event must be entered into the electronic data base.</p> <p><b>Safety Surveillance</b><br/>Telephone: 1-919-668-8624<br/>Free: 1-866-668-7799<br/><b>E: <a href="mailto:Safetysurveillance@mc.duke.edu">Safetysurveillance@mc.duke.edu</a></b><br/>1-919-668-7138</p> | No revision from 3.4 | <p>The text had been updated to provide clarifications to the investigators for reporting adverse events to DCRI Safety Surveillance</p> |

|           |                                                                                                                                                                                                                                                                                                                                                                                                                                                                                                                                                                                                                                                                                                                                                                                                                                                                                                                                                                                                                 |                                                                                                                                                                                                                                                                                                                                                                                                                                                                                                                                                                                                                                                                                                                                                                                                                                                                                                                                       |                      |                                                                                                                                   |
|-----------|-----------------------------------------------------------------------------------------------------------------------------------------------------------------------------------------------------------------------------------------------------------------------------------------------------------------------------------------------------------------------------------------------------------------------------------------------------------------------------------------------------------------------------------------------------------------------------------------------------------------------------------------------------------------------------------------------------------------------------------------------------------------------------------------------------------------------------------------------------------------------------------------------------------------------------------------------------------------------------------------------------------------|---------------------------------------------------------------------------------------------------------------------------------------------------------------------------------------------------------------------------------------------------------------------------------------------------------------------------------------------------------------------------------------------------------------------------------------------------------------------------------------------------------------------------------------------------------------------------------------------------------------------------------------------------------------------------------------------------------------------------------------------------------------------------------------------------------------------------------------------------------------------------------------------------------------------------------------|----------------------|-----------------------------------------------------------------------------------------------------------------------------------|
|           | Toll Free Fax: 1-866-668-7138                                                                                                                                                                                                                                                                                                                                                                                                                                                                                                                                                                                                                                                                                                                                                                                                                                                                                                                                                                                   |                                                                                                                                                                                                                                                                                                                                                                                                                                                                                                                                                                                                                                                                                                                                                                                                                                                                                                                                       |                      |                                                                                                                                   |
| 7.6 / 36  | The DCRI Safety Surveillance Medical Monitor will review all SAEs for expectedness.                                                                                                                                                                                                                                                                                                                                                                                                                                                                                                                                                                                                                                                                                                                                                                                                                                                                                                                             |                                                                                                                                                                                                                                                                                                                                                                                                                                                                                                                                                                                                                                                                                                                                                                                                                                                                                                                                       | No revision from 3.4 | The text had been removed as the information is also provided in section 7.6.2.                                                   |
| 7.6.1 /36 | <p>Since the CABANA Trial is not under an Investigational New Drug Application, the principle investigator and/or designee at the site will be required to complete and submit form 3500A for reporting serious adverse events (SAEs) that are drug related and unexpected via the FDA's MedWatch Adverse Event Reporting program, DCRI Safety Surveillance and/or their designee. Events may be reported online at <a href="http://www.fda.gov/MedWatch/report.htm">www.fda.gov/MedWatch/report.htm</a>, by phone 1-800-FDA-1088, or by returning the postage-paid FDA form 3500 which may be downloaded from <a href="http://www.fda.gov/MedWatch/getforms.htm">www.fda.gov/MedWatch/getforms.htm</a> by mail to MedWatch, 5600 Fishers Lane, Rockville, MD 20852-9787 or fax 1-800-FDA-0178. DCRI Safety Surveillance will be responsible for notifying the NIH. Sites should fax a copy of the completed MedWatch form and a cover sheet documenting the date and time the MedWatch form was submitted.</p> | <p><b>Physician Reporting of Drug or Device Adverse Events</b><br/> <b>Physician reporting of drug or device-related unexpected/unanticipated serious adverse events (as mandated by regulatory authorities) using MedWatch or Council for International Organizations of Medical Sciences (CIOMS) forms, should continue independently of any CABANA reporting. It is anticipated that physicians and/or the appropriate healthcare professional will complete this reporting by, 1) MedWatch- submit form 3500 for drug or device via the FDA's MedWatch Adverse Event Reporting program online at <a href="http://www.fda.gov/MedWatch/report.htm">www.fda.gov/MedWatch/report.htm</a>, by phone 1-00-FDA-1088, or by returning the postage-paid FDA form 3500 downloaded from <a href="http://www.fda.gov/MedWatch/getforms.htm">www.fda.gov/MedWatch/getforms.htm</a> by mail to MedWatch, 5600 Fishers Lane, Rockville,</b></p> | No revision from 3.4 | The text had been updated to provide additional guidance and clarifications to the investigators for reporting of adverse events. |

|            |                                                                                                                                                                                                                                                                                                                                                                                                                                                                                                                                                                                                                                             |                                                                                                                                                                                                                                                                                                                                                                                                                                                                                                                                                                                                                                                                                                                                                                                                                                         |                      |                                                                                                                                    |
|------------|---------------------------------------------------------------------------------------------------------------------------------------------------------------------------------------------------------------------------------------------------------------------------------------------------------------------------------------------------------------------------------------------------------------------------------------------------------------------------------------------------------------------------------------------------------------------------------------------------------------------------------------------|-----------------------------------------------------------------------------------------------------------------------------------------------------------------------------------------------------------------------------------------------------------------------------------------------------------------------------------------------------------------------------------------------------------------------------------------------------------------------------------------------------------------------------------------------------------------------------------------------------------------------------------------------------------------------------------------------------------------------------------------------------------------------------------------------------------------------------------------|----------------------|------------------------------------------------------------------------------------------------------------------------------------|
|            | <p><b>All Events of Interest:</b> (as identified above) will require expedited reporting to the NIH by the DCRI Safety Surveillance within 5 business days of initial notification.</p>                                                                                                                                                                                                                                                                                                                                                                                                                                                     | <p><b>MD 20852-9787 or fax 1-800-FDA-0178, 2) CIOMS- using <a href="http://www.cioms.ch/index.htm">http://www.cioms.ch/index.htm</a>, postal address: c/- World Health Organization, Avenue Appia, 20 CH - 1211 Geneve, 27 Switzerland, telephone: +41 (0) 22 791 34 13 or fax: +41 (0) 22 791 42 86.</b></p>                                                                                                                                                                                                                                                                                                                                                                                                                                                                                                                           |                      |                                                                                                                                    |
| 7.6.2 / 36 | <p>The DCRI Medical Monitor will determine which device-related expedited events meet "unanticipated" criteria (not labeled in the literature). Unanticipated adverse device effects (UADEs) will be reported to the NIH within 1-2 business days, and to the FDA and all participating investigators within 10 working days of DCRI Safety Surveillance's initial notification of the event. Investigators are responsible for reporting UADEs to their reviewing IRB within 10 working days of first learning of the effect. MedWatch surveillance will remain the responsibility of the site using the same approach as noted above.</p> | <p><b>CABANA Reporting of Drug or Device Adverse Events For CABANA trial purposes, adverse events will be reported through the eCRF submission process designed to facilitate notification to DCRI Safety Surveillance and/or their designee.</b> The DCRI Safety Surveillance Medical Monitor (<b>a physician trained and experienced in safety reporting</b>) will review all SAEs for <b>expectedness, potential expected/unexpected; anticipated/unanticipated status.</b> The decision regarding ultimate classification will be made by individuals within CABANA Leadership with expertise in antiarrhythmia and ablation therapies and clinical trial experience.</p> <p><b>All Events of Interest:</b> (as identified above) will require expedited reporting to the NIH by the DCRI Safety Surveillance within 5 business</p> | No revision from 3.4 | <p>The text had been updated to clarify the process followed by DCRI Safety Surveillance for the assessment of adverse events.</p> |



|            |                                                                                                                                                                                                                                                                                                                                                                                                                                                                                                                                             |                                                                                                                                                                                                                                                                                                                |                      |                                                                                                        |
|------------|---------------------------------------------------------------------------------------------------------------------------------------------------------------------------------------------------------------------------------------------------------------------------------------------------------------------------------------------------------------------------------------------------------------------------------------------------------------------------------------------------------------------------------------------|----------------------------------------------------------------------------------------------------------------------------------------------------------------------------------------------------------------------------------------------------------------------------------------------------------------|----------------------|--------------------------------------------------------------------------------------------------------|
|            |                                                                                                                                                                                                                                                                                                                                                                                                                                                                                                                                             | days of initial notification.                                                                                                                                                                                                                                                                                  |                      |                                                                                                        |
| 7.6.3 / 36 | The CABANA exclusion criteria specifically excludes women of childbearing potential unless post-menopausal or surgically sterile. If a pregnancy does occur during the follow-up period, please notify the DCRI Safety Surveillance at 919-668-8624. Pregnancies are not considered adverse events. Complications or medical problems associated with a pregnancy are considered AEs and may be SAEs. Complications or medical problems are reported as AEs/SAEs if they occur during the study follow-up period according to the protocol. | <del>The CABANA exclusion criteria specifically excludes women of childbearing potential unless post-menopausal or surgically sterile. If a pregnancy does occur during the follow-up period, please notify the DCRI Safety Surveillance at 919-668-8624. Pregnancies are not considered adverse events.</del> | No revision from 3.4 | The section about women of childbearing potential was removed, as it is not applicable for this study. |
| 8.1 / 37   | Another important factor that must be considered in these calculations is the extent to which patients randomized to the drug arm may <b>cross over</b> to receive an ablation during the course of their follow-up (because the AF and its symptoms are not adequately controlled by drugs).                                                                                                                                                                                                                                               | Another important factor that must be considered in these calculations is the extent to which patients randomized to the drug arm may <b>cross over</b> to receive an ablation during the course of their follow-up ( <del>because</del> if the AF and its symptoms are not adequately controlled by drugs).   | No revision from 3.4 | Editorial changes to increase the clarity of the text.                                                 |
| 8.2.1 / 39 | The log-rank test will be the primary analytic tool for comparing mortality differences between the two therapies. Kaplan-Meier estimates of cumulative mortality rates as a function of follow-up time will be calculated and displayed.                                                                                                                                                                                                                                                                                                   | The log-rank test will be the primary analytic tool for comparing mortality differences between the two therapies. Kaplan-Meier estimates of cumulative mortality rates as a function of follow-up time will be calculated and displayed.                                                                      | No revision from 3.4 | Editorial changes to increase the clarity of the text.                                                 |

|           |                                                                                                                                                                                                                                                                                                                                                                                                                                                                                                                                                                                           |                                                                                                                                                                                                                                                                                                                                                                                                                                                                                                                                                                                                                                                                                                                                       |                             |                                                                                     |
|-----------|-------------------------------------------------------------------------------------------------------------------------------------------------------------------------------------------------------------------------------------------------------------------------------------------------------------------------------------------------------------------------------------------------------------------------------------------------------------------------------------------------------------------------------------------------------------------------------------------|---------------------------------------------------------------------------------------------------------------------------------------------------------------------------------------------------------------------------------------------------------------------------------------------------------------------------------------------------------------------------------------------------------------------------------------------------------------------------------------------------------------------------------------------------------------------------------------------------------------------------------------------------------------------------------------------------------------------------------------|-----------------------------|-------------------------------------------------------------------------------------|
|           | Relative risks will be expressed as hazard ratios with 95% confidence intervals using the Cox proportional hazards model                                                                                                                                                                                                                                                                                                                                                                                                                                                                  | Relative risks will be expressed as hazard ratios with 95% confidence intervals <b>generated</b> using the Cox proportional hazards model                                                                                                                                                                                                                                                                                                                                                                                                                                                                                                                                                                                             |                             |                                                                                     |
| 11.1 / 45 | During monitoring visits, the Monitor will perform a one hundred percent (100%) review of all Inclusion/Exclusion criteria, informed consent, HIPAA Authorization, all events meeting criteria for expedited event reporting as well as safety and efficacy endpoints. Additional review will be performed on a site-by-site basis, as warranted by the findings of previous monitoring visits. Key variables (demographics, inclusion/exclusion criteria, and safety) on the eCRFs) will be compared with each subject's source documents. Any discrepancies will be noted and resolved. | During monitoring visits, the Monitor will perform a <b>ten</b> percent (10%) review of all Inclusion/Exclusion criteria <b>of the randomized subjects since last periodic monitoring visit. Review of 100% of the</b> informed consent <b>forms</b> , HIPAA Authorization, all events meeting criteria for expedited event reporting as well as <b>10% of SAE's and Events of Interest EOI will be performed.</b> Additional review will be performed on a site-by-site basis, as warranted by the findings of previous monitoring visits. Key variables (demographics, inclusion/exclusion criteria, and safety) on the eCRFs) will be compared with each subject's source documents. Any discrepancies will be noted and resolved. | No revision from 3.4        | The text had been updated to clarify the expectations during site monitoring visits |
| 13.0 / 47 | 6. Description of adverse events and follow-up of the adverse events (minimally event description, severity, onset date, duration, relation to study device, outcome and treatment for adverse event).                                                                                                                                                                                                                                                                                                                                                                                    | 6. Description of adverse events and follow-up of the adverse events (minimally event description, severity, onset date, duration, relation to study <b>drug or</b> device, outcome and treatment for adverse event).                                                                                                                                                                                                                                                                                                                                                                                                                                                                                                                 | No revision from 3.4        | Editorial changes to increase the clarity of the text.                              |
| 14.0 / 48 | Investigators will maintain                                                                                                                                                                                                                                                                                                                                                                                                                                                                                                                                                               | No revisions for 3.3                                                                                                                                                                                                                                                                                                                                                                                                                                                                                                                                                                                                                                                                                                                  | Investigators will maintain | Editorial changes to                                                                |

|           |                                                                                                                                                                                                                                                                                                                                                                                                                                                                                                                                                                                                                                                                     |                      |                                                                                                                                                                                                                                                                                                                                                                                                                                                                                                                                                                                                                                                                                                                                                                                                                                                                                                                   |                                                                                                            |
|-----------|---------------------------------------------------------------------------------------------------------------------------------------------------------------------------------------------------------------------------------------------------------------------------------------------------------------------------------------------------------------------------------------------------------------------------------------------------------------------------------------------------------------------------------------------------------------------------------------------------------------------------------------------------------------------|----------------------|-------------------------------------------------------------------------------------------------------------------------------------------------------------------------------------------------------------------------------------------------------------------------------------------------------------------------------------------------------------------------------------------------------------------------------------------------------------------------------------------------------------------------------------------------------------------------------------------------------------------------------------------------------------------------------------------------------------------------------------------------------------------------------------------------------------------------------------------------------------------------------------------------------------------|------------------------------------------------------------------------------------------------------------|
|           | documentation of the dates and reasons for each deviation from the protocol, in compliance with Code of Federal Regulations (CFR) 812.140.                                                                                                                                                                                                                                                                                                                                                                                                                                                                                                                          |                      | documentation of the dates and reasons for each deviation from the protocol, in compliance with <b>the ICH-GCP guidelines</b> , Code of Federal Regulations (CFR) 812.140 <b>and national legislation</b> .                                                                                                                                                                                                                                                                                                                                                                                                                                                                                                                                                                                                                                                                                                       | reflect the accurate legislation locally for all sites within all their countries respectively             |
| 16.0 / 49 | Upon completion of the study (defined by all subjects have completed all follow-up visits, all eCRFs are complete, and all queries have been resolved, DCRI and/or their designee will notify the site of closeout and a study closeout visit will be performed. The DCRI monitor and/or their designee will ensure that the Investigator's regulatory files are up to date and complete, and that any outstanding issues from previous correspondences have been resolved. Other issues to be reviewed at the closeout visit include: discussing retention of study files, possibility of site audits, publication policy, and notifying the IRB of study closure. | No revisions for 3.3 | <p><b>The end of trial is defined as the day of the last visit of the last subject in the trial.</b></p> <p><b>For clinical trial sites located in the EU, a declaration of the end of the clinical trial will be made according to the procedures outlined in Directive 2001/20/EC. For sites located in countries outside the EU, local regulations will be followed.</b></p> <p>Upon completion of the study <del>(defined by all subjects have completed all follow-up visits, all eCRFs are complete, and all queries have been resolved,)</del> DCRI and/or their designee will notify the site of closeout and a study closeout visit will be performed. The DCRI monitor and/or their designee will ensure that the Investigator's regulatory files are up to date and complete, and that any outstanding issues from previous correspondences have been resolved. Other issues to be reviewed at the</p> | <p>Editorial changes defining the end of the trial.</p> <p>Language inserted for regulatory compliance</p> |

|           |                                                                                                                                                                                                                                                                                                                                                                                                                                                                                                                                                                                                                                                                                                                                                                                                      |                      |                                                                                                                                                                                                                                                                                                                                                                                                                                                                                                                                                                                                                                                                                                                                                                                                                                                                                                                                                                 |                                                               |
|-----------|------------------------------------------------------------------------------------------------------------------------------------------------------------------------------------------------------------------------------------------------------------------------------------------------------------------------------------------------------------------------------------------------------------------------------------------------------------------------------------------------------------------------------------------------------------------------------------------------------------------------------------------------------------------------------------------------------------------------------------------------------------------------------------------------------|----------------------|-----------------------------------------------------------------------------------------------------------------------------------------------------------------------------------------------------------------------------------------------------------------------------------------------------------------------------------------------------------------------------------------------------------------------------------------------------------------------------------------------------------------------------------------------------------------------------------------------------------------------------------------------------------------------------------------------------------------------------------------------------------------------------------------------------------------------------------------------------------------------------------------------------------------------------------------------------------------|---------------------------------------------------------------|
|           |                                                                                                                                                                                                                                                                                                                                                                                                                                                                                                                                                                                                                                                                                                                                                                                                      |                      | closeout visit include:<br>discussing retention of study files, possibility of site audits, publication policy, and notifying the IRB of study closure.                                                                                                                                                                                                                                                                                                                                                                                                                                                                                                                                                                                                                                                                                                                                                                                                         |                                                               |
| 18.0 / 50 | The principal investigator or IRB-documented members of the research team will approach the patient to obtain written informed consent. The underlying rationale for the study, the procedures to be followed, the potential benefits, risks, alternatives, and other issues mandated by the consent process will be fully disclosed. Written informed consent will be documented on an informed consent form (ICF) approved by the same IRB responsible for approval of this protocol, The ICF will conform to FDA regulations in 21 CFR Part 50, and to the institutional requirements for informed consent and applicable regulations. The investigator agrees to obtain approval from DCRI and/or their designee of any ICF intended for use in the study, prior to submission for IRB approval. | No revisions for 3.3 | The principal investigator or IRB-documented members of the research team will approach the patient to obtain written informed consent <b>on an informed consent form (ICF) approved by the same IRB/EC responsible for approval of this protocol. The informed consent document will conform to FDA regulations in 21 CFR Part 50, and/or to the national requirements for informed consent. It must include all elements required by law, local regulations, GCP and International Conference on Harmonization guidelines and study specific procedures.</b> The underlying rationale for the study, the procedures to be followed, the potential benefits, risks, alternatives, and other issues mandated by the consent process will be fully disclosed. <b>If new information become available during the course of the trial that may be relevant to the subject's consent, the Informed Consent Form will be revised and the revised version will be</b> | Language revised/<br>inserted for<br>regulatory<br>compliance |

|           |                                                                                                                                                                                                                                                                                                                                                                                                                                                                                                                                                                                                                                                                                         |                      |                                                                                                                                                                                                                                                                                                                                                                                                                                                                                                                                                                                                                                                                                                           |                                                                   |
|-----------|-----------------------------------------------------------------------------------------------------------------------------------------------------------------------------------------------------------------------------------------------------------------------------------------------------------------------------------------------------------------------------------------------------------------------------------------------------------------------------------------------------------------------------------------------------------------------------------------------------------------------------------------------------------------------------------------|----------------------|-----------------------------------------------------------------------------------------------------------------------------------------------------------------------------------------------------------------------------------------------------------------------------------------------------------------------------------------------------------------------------------------------------------------------------------------------------------------------------------------------------------------------------------------------------------------------------------------------------------------------------------------------------------------------------------------------------------|-------------------------------------------------------------------|
|           |                                                                                                                                                                                                                                                                                                                                                                                                                                                                                                                                                                                                                                                                                         |                      | <p>submitted for EC/IRB approval before use.</p> <p><del>Written informed consent will be documented on an informed consent form (ICF) approved by the same IRB responsible for approval of this protocol. The ICF will conform to FDA regulations in 21 CFR Part 50, and to the institutional requirements for informed consent and applicable regulations.</del></p>                                                                                                                                                                                                                                                                                                                                    |                                                                   |
| 19.0 / 50 | <p>Subject information collected in this study will comply with the standards for protection of privacy of individually identifiable health information as promulgated in the Health Assurance Portability and Accountability Act and as mandated in Title 45 CFR, Parts 160 and 164. All records will be kept confidential and the subject's name will not be released by study staff at any time. Subject records will not be released to anyone other than DCRI and/or their designee, and responsible regulatory authorities when requested. In all cases, caution will be exercised to assure the data are treated confidentially and that the subject's privacy is protected.</p> | No revisions for 3.3 | <p>Subject information collected in this study <del>will comply with the standards for protection of privacy of individually identifiable health information as promulgated in the Health Assurance Portability and Accountability Act and as mandated in Title 45 CFR, Parts 160 and 164</del> and all records will be kept confidential and the subject's name will not be released by study staff at any time.</p> <p><del>Subject records will not be released to anyone other than DCRI and/or their designee, and responsible regulatory authorities. The subject must be informed that his/her personal trial-related data will be used by the sponsor in accordance with the local data</del></p> | Language revised/ inserted for accuracy and regulatory compliance |

|           |                                                                                                                                                                                                                                                                                                                                                                |                       |                                                                                                                                                                                                                                                                                                                                                                                                                                                                        |                                                      |
|-----------|----------------------------------------------------------------------------------------------------------------------------------------------------------------------------------------------------------------------------------------------------------------------------------------------------------------------------------------------------------------|-----------------------|------------------------------------------------------------------------------------------------------------------------------------------------------------------------------------------------------------------------------------------------------------------------------------------------------------------------------------------------------------------------------------------------------------------------------------------------------------------------|------------------------------------------------------|
|           |                                                                                                                                                                                                                                                                                                                                                                |                       | protection legislation. The subject will also be informed that, when requested, his / her medical records may be examined by authorized monitors (DCRI and/or their designee) or Clinical Quality Assurance auditors appointed by the sponsor, by appropriate IRB / IEC members and by domestic and foreign regulatory authorities. In all cases, caution will be exercised to assure the data are treated confidentially and that the subject's privacy is protected. |                                                      |
| 20.0 / 51 | An Authorization for use and disclosure of protected health information (PHI) under the HIPAA Privacy Rule [45 CFR § 164.102 <i>et seq</i> ] will be obtained from every trial subject prior to, or at the time of, enrollment.                                                                                                                                | No revisions from 3.3 | A For clinical trial sites located in the US, an Authorization for use and disclosure of protected health information (PHI) under the HIPAA Privacy Rule [45 CFR § 164.102 <i>et seq</i> ] will be obtained from every trial subject prior to, or at the time of, enrollment.                                                                                                                                                                                          | Language revised/ accuracy and regulatory compliance |
| 22.0 / 51 | The appropriate IRB/EC must approve the protocol and informed consent documents, agree to monitor the conduct of the study, and agree to review study progress periodically, at intervals not to exceed 1 year. The investigator will provide DCRI or their designee with documentation that the IRB has approved the study <i>before</i> the study may begin. | No revisions from 3.3 | This study will be initiated only after all required legal documentation has been reviewed and approved by the respective IRB / EC and competent authority (CA) according to national and international regulations. <del>The appropriate IRB/EC must approve the protocol and informed consent documents, agree to monitor the conduct</del>                                                                                                                          | Language revised/ accuracy and regulatory compliance |

|  |                                                                                                                                                                                                                                                                                                                                                                                                                                                                                                                                                                                                                                                                                                                                                                                      |  |                                                                                                                                                                                                                                                                                                                                                                                                                                                                                                                                                                                                                                                                                                                                                                                                                                                                                                                                                                                                                                                                                                                                                              |  |
|--|--------------------------------------------------------------------------------------------------------------------------------------------------------------------------------------------------------------------------------------------------------------------------------------------------------------------------------------------------------------------------------------------------------------------------------------------------------------------------------------------------------------------------------------------------------------------------------------------------------------------------------------------------------------------------------------------------------------------------------------------------------------------------------------|--|--------------------------------------------------------------------------------------------------------------------------------------------------------------------------------------------------------------------------------------------------------------------------------------------------------------------------------------------------------------------------------------------------------------------------------------------------------------------------------------------------------------------------------------------------------------------------------------------------------------------------------------------------------------------------------------------------------------------------------------------------------------------------------------------------------------------------------------------------------------------------------------------------------------------------------------------------------------------------------------------------------------------------------------------------------------------------------------------------------------------------------------------------------------|--|
|  | <p>In addition, the investigator must provide the following documentation to DCRI or their designee.</p> <ol style="list-style-type: none"> <li>1. IRB annual re-approval of the protocol, per current Title 21 CFR 312.66 regulations and 1997 International Conference on Harmonization guidelines.</li> <li>2. IRB approval of revisions to the informed consent documents or any amendments to the protocol. Any revisions to the protocol that may increase subject risk exposure must be approved prior to implementation. Administrative changes (such as a change in address or phone number) must be sent to IRBs/Ethics Committees but do not require their approval. The investigator will provide DCRI or their designee with documentation of all approvals.</li> </ol> |  | <p><del>of the study, and agree to review study progress periodically, at intervals not to exceed 1 year.</del> The investigator will provide DCRI or their designee with the study approval documentation before the study may begin. <del>documentation that the IRB has approved the study before the study may begin.</del> The same is applicable for the implementation of changes introduced by amendments. Where applicable, <del>In addition,</del> the investigator must also provide to DCRI and/or their designee the following <del>documentation to DCRI or their designee.</del></p> <ol style="list-style-type: none"> <li>1. A copy of IRB annual re-approval of the protocol, per current Title 21 CFR 312.66 regulations and 1997 International Conference on Harmonization guidelines.</li> <li>2. IRB approval of revisions to the informed consent documents <del>or any amendments to the protocol. Any revisions to the protocol that may increase subject risk exposure must be approved prior to implementation.</del> Administrative changes (such as a change in address or phone number) must be sent to IRBs/Ethics</li> </ol> |  |
|--|--------------------------------------------------------------------------------------------------------------------------------------------------------------------------------------------------------------------------------------------------------------------------------------------------------------------------------------------------------------------------------------------------------------------------------------------------------------------------------------------------------------------------------------------------------------------------------------------------------------------------------------------------------------------------------------------------------------------------------------------------------------------------------------|--|--------------------------------------------------------------------------------------------------------------------------------------------------------------------------------------------------------------------------------------------------------------------------------------------------------------------------------------------------------------------------------------------------------------------------------------------------------------------------------------------------------------------------------------------------------------------------------------------------------------------------------------------------------------------------------------------------------------------------------------------------------------------------------------------------------------------------------------------------------------------------------------------------------------------------------------------------------------------------------------------------------------------------------------------------------------------------------------------------------------------------------------------------------------|--|

|           |  |                                                                                                                                                                                                                                                                                                                                                                                                                                                                                                                                                                           |                                                                                                                                                                                                                                                                                                                                                                                                                                                    |                                                                                                                                                                                                                                                                                                                                                                                |
|-----------|--|---------------------------------------------------------------------------------------------------------------------------------------------------------------------------------------------------------------------------------------------------------------------------------------------------------------------------------------------------------------------------------------------------------------------------------------------------------------------------------------------------------------------------------------------------------------------------|----------------------------------------------------------------------------------------------------------------------------------------------------------------------------------------------------------------------------------------------------------------------------------------------------------------------------------------------------------------------------------------------------------------------------------------------------|--------------------------------------------------------------------------------------------------------------------------------------------------------------------------------------------------------------------------------------------------------------------------------------------------------------------------------------------------------------------------------|
|           |  |                                                                                                                                                                                                                                                                                                                                                                                                                                                                                                                                                                           | <p>Committees but do not require their approval. <del>The investigator will provide DCRI or their designee with documentation of all approvals.</del></p> <p>3. The investigator must submit periodic status reports to their EC as required, as well as notification of completion of the study and a final report where applicable.</p> <p>4. The investigator will provide DCRI or their designee with documentation of all approvals.</p>      |                                                                                                                                                                                                                                                                                                                                                                                |
| 24.0 / 52 |  | <p><b>24.0 Sub-Studies</b></p> <p><b>24.1 CABANAgene</b><br/> <u>CABANAgene</u>: a resource that will accumulate DNA samples from CABANA subjects to enable subsequent genotype-phenotype studies.</p> <p>Appendix C, page 62, the CABANAgene protocol, provides the rationale for studies and approaches that are anticipated. The major goal of CABANAgene is to create the resource. Specific projects to use the samples would require approval of the CABANA study group, and phenotypes to be studied would be those collected by and adjudicated by the CABANA</p> | <p><b>24.0 Sub-Studies</b></p> <p>All activated sites will be given the opportunity to participate or not participate. All proposed sub-studies will be first submitted for review and approval to the respective IRB / EC and competent authority (CA) based on national and international regulations. It is further acknowledged that subjects enrolled in CABANA will have the choice to participate or to not participate in sub-studies.</p> | <p>Language added for clarity that all Sub-Studies are optional for activated sites and enrolled subjects.</p> <p>CABANA is comparing two major approaches for management of atrial fibrillation (AF): drugs to maintain sinus rhythm and ablation. As in all other large clinical trials, responses to therapy will be variable in both treatment arms. Abundant evidence</p> |



|                 |                     |                                                                                                                                                                                                                                                                                                                                                                                                                                                                                                                                                                                                                  |  |                                                                                                                                                                                                                                                                                                                                                                                                                                                                                                                                                      |
|-----------------|---------------------|------------------------------------------------------------------------------------------------------------------------------------------------------------------------------------------------------------------------------------------------------------------------------------------------------------------------------------------------------------------------------------------------------------------------------------------------------------------------------------------------------------------------------------------------------------------------------------------------------------------|--|------------------------------------------------------------------------------------------------------------------------------------------------------------------------------------------------------------------------------------------------------------------------------------------------------------------------------------------------------------------------------------------------------------------------------------------------------------------------------------------------------------------------------------------------------|
|                 |                     | <p>study group. The CABANAgene project is included in the Pharmacogenetics Research Network (PGRN) arrhythmia site renewal. Participation under the PGRN umbrella also provides access to advanced genotyping and genetic statistical methods to investigators accessing the CABANAgene resource.</p> <p>Examples of issues that CABANAgene could address include: 1) predictors of response to antiarrhythmic or rate control drug therapies; 2) predictors of response to warfarin therapy; 3) predictors of response to ablation therapy and; 4) clinical and genetic approaches to defining AF subtypes.</p> |  | <p>points to genetic factors as a contributor to such variability in important human phenotypes such as response to treatment, and the goal of CABANAgene is the creation of a large resource linking to test hypotheses that relate genetic variation to disease susceptibility and treatment responses. Collecting DNA from patients in CABANA will address questions such as which patients are most likely to respond to ablation or drug therapy and which patients are most likely to develop complications with ablation or drug therapy.</p> |
| Appendix A / 60 | Deleted (see below) | Added (see below)                                                                                                                                                                                                                                                                                                                                                                                                                                                                                                                                                                                                |  | The list of Anticipated Events has been updated according to the most recent clinical data.                                                                                                                                                                                                                                                                                                                                                                                                                                                          |

|                 |  |                                                      |  |                       |
|-----------------|--|------------------------------------------------------|--|-----------------------|
| Appendix C / 62 |  | Sub study CABANAgene (see protocol V3.4, Appendix C) |  | Same as above in 24.0 |
|-----------------|--|------------------------------------------------------|--|-----------------------|

## **Appendix A- DELETED**

The following events have been identified as “Anticipated Events” for subjects randomized to medical therapy for this study.

### **Medical Therapy events**

- |                                      |                                                |
|--------------------------------------|------------------------------------------------|
| 1. Bradycardia                       | 22. Blurred / double vision                    |
| 2. Heart Block                       | 23. Deteriorating vision                       |
| 3. Bundle Branch block               | 24. Blindness                                  |
| 4. Intraventricular conduction delay | 25. Unusual metallic taste or changes in taste |
| 5. Hypotension                       | 26. Hyperthyroidism                            |
| 6. Dizziness / light headedness      | 27. Hypothyroidism                             |
| 7. Syncope                           | 28. Abnormal liver functions                   |
| 8. Shortness of breath               | 29. Photosensitivity                           |
| 9. Fatigue                           | 30. Bluish / gray skin tone                    |
| 10. Wheezing                         | 31. Unsteady gait / imbalance                  |
| 11. Asthma exacerbation              | 32. Lung toxicity/interstitial inflammation    |
| 12. Nausea/vomiting                  | 33. Drug related nonsustained VT               |
| 13. Depression                       | 34. Sustained VT                               |
| 14. Impotence                        | 35. Prolonged QT/Torsade des pointes           |
| 15. Peripheral edema                 | 36. Proarrhythmia; new or worsened             |
| 16. Heart failure                    | 37. Ventricular fibrillation                   |
| 17. Skin rashes                      | 38. Ventricular tachycardia                    |
| 18. Diarrhea                         | 39. Stroke / thromboembolic event              |
| 19. Constipation                     | 40. Renal failure                              |
| 20. Poor appetite                    | 41. Seizure                                    |
| 21. Alteration of color vision       | 42. Allergic reaction or anaphylaxis           |

The following events have been identified as “Anticipated Events” for subjects randomized to ablative therapy for this study.

### **Ablation Therapy or procedure related events:**

- |                                               |                       |
|-----------------------------------------------|-----------------------|
| 1. Related to catheter insertion:             | 2. Pulmonary embolism |
| a. Infection                                  | 3. Pneumothorax       |
| b. Sepsis                                     | 4. Hemothorax         |
| c. Bleeding                                   | 5. Pleural effusion   |
| d. Bruising / ecchymosis                      | 6. Pneumonia          |
| e. Pain                                       |                       |
| f. Hematoma (not requiring blood transfusion) |                       |
| g. Pseudoaneurysm                             |                       |
| h. A-V fistula                                |                       |
| i. Vessel trauma                              |                       |
| j. DVT                                        |                       |
| k. Urinary tract infection                    |                       |

## DELETED

1. Related to medications: as listed under Medical therapy with the following additions:
  - a. Allergic reaction (skin rash, SOB)
  - b. Hypotension
  - c. Kidney damage
  - d. Respiratory depression
  - e. Left ventricular dysfunction
  - f. Headache / nausea
  - g. Bleeding from heparin
  - h. Visual migraine
  - i. Complete AV block
  - j. Transient AV block
  - k. Permanent AV block
  - l. Volume overload
2. Related to catheter manipulation:
  - a. Myocardial perforation
  - b. Pericardial effusion
  - c. Tamponade
  - d. Myocardial infarction
  - e. Other ischemic event
  - f. Coronary artery spasm
  - g. Coronary artery occlusion
  - h. Coronary artery dissection
  - i. Stroke
  - j. TIA
  - k. Peripheral thromboembolic event
  - l. Cardiac thromboembolic event
  - m. Air embolism
  - n. Heart valve damage
  - o. Clinically relevant sinus node block
  - p. Clinically relevant AV node dysfunction
  - q. Damage to Pacemaker or pacemaker leads
3. Related to ablation:
  - a. Chest pain during energy delivery
  - b. Pericarditis
  - c. Radiation skin burn
  - d. Radiation related cancers
  - e. Phrenic nerve damage
  - f. Pulmonary vein stenosis
  - g. Pulmonary vein damage/dissection
  - h. Pulmonary vein thrombus
  - i. Pulmonary edema
  - j. Pulmonary hypertension
  - k. Esophageal atrial fistula
  - l. New or worsened Gastroesophageal reflux
  - m. Pleuritic chest pain
  - n. Elevated creatinine phosphokinase (CPK)
  - o. Temperature elevation
  - p. Vasovagal reaction
  - q. Esophagus or stomach erosion disorder, esophageal achalasia, esophageal ulcers, or stomach emptying disorder

## Appendix A Adverse Events

The following events have been identified as “Anticipated Events” for subjects randomized to drug or ablation therapy for this study.

| CATEGORY                | ANTICIPATED EVENT                            |
|-------------------------|----------------------------------------------|
| <b>CARDIOVASCULAR</b>   |                                              |
|                         | 1 Air embolism                               |
|                         | 2 Bradycardia                                |
|                         | 3 Cardiac arrest                             |
|                         | 4 Cardiac thromboembolic event               |
|                         | 5 Chest pain during energy delivery          |
|                         | 6 Clinically relevant AV node dysfunction    |
|                         | 7 Clinically relevant sinus node block       |
|                         | 8 Complete/permanent AV block                |
|                         | 9 Coronary artery dissection                 |
|                         | 10 Coronary artery occlusion                 |
|                         | 11 Coronary artery spasm                     |
|                         | 12 Nonsustained VT                           |
|                         | 13 Elevated creatinine phosphokinase (CPK)   |
|                         | 14 Heart failure (Class I, II, III, IV)      |
|                         | 15 Heart valve damage                        |
|                         | 16 Hypotension                               |
|                         | 17 Intraventricular conduction delay         |
|                         | 18 Ischemia                                  |
|                         | 19 Left ventricular dysfunction              |
|                         | 20 Myocardial infarction                     |
|                         | 21 Myocardial perforation                    |
|                         | 22 Pacemaker damage                          |
|                         | 23 Pericardial effusion                      |
|                         | 24 Pericarditis                              |
|                         | 25 Proarrhythmia; new or worsened arrhythmia |
|                         | 26 Prolonged QT                              |
|                         | 27 Sustained VT                              |
|                         | 28 Tamponade                                 |
|                         | 29 Torsade des pointes                       |
|                         | 30 Transient AV block                        |
|                         | 31 Ventricular fibrillation                  |
| <b>ENDOCRINE</b>        |                                              |
|                         | 32 Hyperthyroidism                           |
| <b>GENERAL</b>          |                                              |
|                         | 33 Hypothyroidism                            |
|                         | 34 Allergic reaction (skin rash, SOB)        |
|                         | 35 Bluish / gray skin tone                   |
|                         | 36 Fatigue                                   |
|                         | 37 Photosensitivity                          |
|                         | 38 Radiation related cancers                 |
|                         | 39 Radiation skin burn                       |
|                         | 40 Skin rashes                               |
|                         | 41 Temperature elevation                     |
|                         | 42 Volume overload                           |
| <b>GASTROINTESTINAL</b> |                                              |
|                         | 43 Constipation                              |
|                         | 44 Diarrhea                                  |
|                         | 45 Esophageal atrial fistula                 |
|                         | 46 Esophageal disorder                       |
|                         | 47 Gastroesophageal reflux                   |
|                         | 48 Stomach disorder                          |
|                         | 49 Nausea                                    |
|                         | 50 Poor appetite                             |
|                         | 51 Unusual taste (metallic or other)         |
|                         | 52 Vomiting                                  |
|                         | 53 Abnormal liver functions                  |
| <b>GENITOURINARY</b>    |                                              |
|                         | 54 Impotence                                 |
|                         | 55 Kidney damage                             |
|                         | 56 Renal failure                             |
|                         | 57 Urinary tract infection                   |
| <b>INFECTIOUS</b>       |                                              |
|                         | 58 Infection                                 |
|                         | 59 Sepsis                                    |
| <b>NEUROLOGIC</b>       |                                              |
|                         | 60 Alteration of color vision                |
|                         | 61 Blindness                                 |
|                         | 62 Blurred / double vision                   |
|                         | 63 Depression                                |
|                         | 64 Deteriorating vision                      |
|                         | 65 Dizziness / light headedness              |
|                         | 66 Headache                                  |
|                         | 67 Pain                                      |
|                         | 68 Phrenic nerve damage                      |
|                         | 69 Seizure                                   |
|                         | 70 Stroke                                    |
|                         | 71 Syncope                                   |
|                         | 72 TIA                                       |
|                         | 73 Unsteady gait / imbalance                 |
|                         | 74 Vasovagal reaction                        |
|                         | 75 Visual migraine                           |

## Appendix A Adverse Events (continued)

The following events have been identified as “Anticipated Events” for subjects randomized to drug or ablation therapy for this study.

| CATEGORY                   | ANTICIPATED EVENT                   |
|----------------------------|-------------------------------------|
| <b>PULMONARY</b>           |                                     |
|                            | 76 Asthma exacerbation              |
|                            | 77 Hemothorax                       |
|                            | 78 Lung toxicity                    |
|                            | 79 Pleural effusion                 |
|                            | 80 Pneumonia                        |
|                            | 81 Pneumothorax                     |
|                            | 82 Pulmonary edema                  |
|                            | 83 Pulmonary embolism               |
|                            | 84 Pulmonary hypertension           |
|                            | 85 Pulmonary vein damage/dissection |
|                            | 86 Pulmonary vein stenosis          |
|                            | 87 Pulmonary vein thrombus          |
|                            | 88 Respiratory depression           |
|                            | 89 Shortness of breath/dyspnea      |
|                            | 90 Wheezing                         |
|                            | 91 Pleuritic chest pain             |
| <b>PERIPHERAL VASCULAR</b> |                                     |
|                            | 92 A-V fistula                      |
|                            | 93 Bleeding                         |
|                            | 94 Bleeding from heparin            |
|                            | 95 Bruising / ecchymosis            |
|                            | 96 DVT                              |
|                            | 97 Hematoma                         |
|                            | 98 Peripheral edema                 |
|                            | 99 Peripheral thromboembolic event  |
|                            | 100 Pseudoaneurysm                  |
|                            | 101 Thromboembolic event            |
|                            | 102 Vessel trauma                   |



|                                 |                                                                                                                                                                                                                                                                                                                                                                                                                                                                                               |                                                                                                                                                                                                                                                                                                                                                                                                                                                                                                                                                                         |                                                                                                                                                                                                                                                                              |
|---------------------------------|-----------------------------------------------------------------------------------------------------------------------------------------------------------------------------------------------------------------------------------------------------------------------------------------------------------------------------------------------------------------------------------------------------------------------------------------------------------------------------------------------|-------------------------------------------------------------------------------------------------------------------------------------------------------------------------------------------------------------------------------------------------------------------------------------------------------------------------------------------------------------------------------------------------------------------------------------------------------------------------------------------------------------------------------------------------------------------------|------------------------------------------------------------------------------------------------------------------------------------------------------------------------------------------------------------------------------------------------------------------------------|
|                                 |                                                                                                                                                                                                                                                                                                                                                                                                                                                                                               | (hypertension, diabetes, heart failure, prior stroke or TIA or systemic emboli, Atherosclerotic vascular disease (previous MI, peripheral arterial disease or aortic plaque), or left atrial diameter $\geq$ 5.0 cm or left atrial volume $\geq$ 40 cc/m <sup>2</sup> ). Eligible subjects with persistent or long-standing persistent AF will require at least 1 documented episode. See main protocol for complete inclusion/exclusion criteria.                                                                                                                      | addition of CHADS-VASc criteria and decrease rate control drugs to $\geq$ 2.                                                                                                                                                                                                 |
| STUDY HYPOTHESIS                | The treatment strategy of percutaneous left atrial catheter ablation for the purpose of eliminating atrial fibrillation (AF) is superior to current state-of-the-art therapy with either rate control or rhythm control drugs for reducing total mortality (primary endpoint) and decreasing the composite endpoint of total mortality, disabling stroke, serious bleeding, and cardiac arrest (secondary endpoint) in subjects with untreated or incompletely treated AF warranting therapy. | The treatment strategy of percutaneous left atrial catheter ablation for the purpose of eliminating atrial fibrillation (AF) is superior to current state-of-the-art therapy with either rate control or rhythm control drugs for reducing a) the composite endpoint of total mortality, disabling stroke, serious bleeding, or cardiac arrest (primary endpoint; previously the key secondary endpoint) and decreasing total mortality (secondary endpoint; previously the primary endpoint) in subjects with untreated or incompletely treated AF warranting therapy. | Due to a lower than expected aggregated mortality rate, the DSMB suggested: change the primary endpoint of the trial from total mortality to the original key secondary endpoint consisting of the composite of death, disabling stroke, serious bleeding, or cardiac arrest |
| DURATION OF STUDY PARTICIPATION | Enrollment will occur over approximately 4 years, and subjects will be followed a minimum of 2 years.                                                                                                                                                                                                                                                                                                                                                                                         | Enrollment will occur over approximately 4 years, and subjects will be followed for an average of approximately 5 years.                                                                                                                                                                                                                                                                                                                                                                                                                                                | Due to the accrual of patients at a slower rate than projected DSMB suggested: decreasing the sample size and extend the follow-up                                                                                                                                           |
| NUMBER OF SUBJECTS              | 3000 with a 1:1 randomization ratio                                                                                                                                                                                                                                                                                                                                                                                                                                                           | 2000-2200 with a 1:1 randomization ratio                                                                                                                                                                                                                                                                                                                                                                                                                                                                                                                                |                                                                                                                                                                                                                                                                              |
| NUMBER OF SITES                 | Total number: 140<br>North American Sites: 100<br>Non-North American Sites: 40                                                                                                                                                                                                                                                                                                                                                                                                                | Total number: approximately 180<br>North American Sites: approximately 120<br>Non-North American Sites: approximately 60                                                                                                                                                                                                                                                                                                                                                                                                                                                | Possible number and distribution of sites needed to complete the Trial                                                                                                                                                                                                       |
| PRIMARY ENDPOINT                | Total mortality                                                                                                                                                                                                                                                                                                                                                                                                                                                                               | Composite of: 1) total mortality, 2) disabling stroke, 3) serious bleeding, or 4) cardiac arrest.                                                                                                                                                                                                                                                                                                                                                                                                                                                                       | DSMB suggested: Primary secondary a composite                                                                                                                                                                                                                                |
| SECONDARY                       | Cardiovascular death, Cardiovascular                                                                                                                                                                                                                                                                                                                                                                                                                                                          | Total mortality,                                                                                                                                                                                                                                                                                                                                                                                                                                                                                                                                                        | DSMB suggested:                                                                                                                                                                                                                                                              |



|                                |                                                                                                                                                                                                                                                                                                                                                                                                                                                                                                                                                                                                                                         |                                                                                                                                                                                                                                                                                                                                                                                                                                                                                                                                                                                                                                                                                                                                                                                                                                                                |                                                                |
|--------------------------------|-----------------------------------------------------------------------------------------------------------------------------------------------------------------------------------------------------------------------------------------------------------------------------------------------------------------------------------------------------------------------------------------------------------------------------------------------------------------------------------------------------------------------------------------------------------------------------------------------------------------------------------------|----------------------------------------------------------------------------------------------------------------------------------------------------------------------------------------------------------------------------------------------------------------------------------------------------------------------------------------------------------------------------------------------------------------------------------------------------------------------------------------------------------------------------------------------------------------------------------------------------------------------------------------------------------------------------------------------------------------------------------------------------------------------------------------------------------------------------------------------------------------|----------------------------------------------------------------|
| OUTCOMES                       | death or disabling stroke, Arrhythmic death or cardiac arrest, Heart failure death, Freedom from recurrent AF, Cardiovascular hospitalization, Medical costs and resource use and cost effectiveness, Quality of life, Composite adverse events, LA size, morphology and function.                                                                                                                                                                                                                                                                                                                                                      | Total mortality or cardiovascular hospitalization, Total mortality or stroke or cardiovascular hospitalization, Cardiovascular death, Cardiovascular death or disabling stroke, Arrhythmic death or cardiac arrest, Heart failure death, Freedom from recurrent AF, Cardiovascular hospitalization, Medical costs and resource use and cost effectiveness, Quality of life, Composite adverse events, LA size, morphology and function.                                                                                                                                                                                                                                                                                                                                                                                                                        | Secondary endpoint revised                                     |
| TOC /8                         |                                                                                                                                                                                                                                                                                                                                                                                                                                                                                                                                                                                                                                         | Updated to version 3.5                                                                                                                                                                                                                                                                                                                                                                                                                                                                                                                                                                                                                                                                                                                                                                                                                                         |                                                                |
| 1.0 /12<br>Introduction        | An ablation trial evaluating overall mortality, conducted within a population at increased risk, will provide the most compelling evidence for guiding the therapy of this malady. The completion of the 60 patient CABANA Pilot Study provides solid evidence of the feasibility of this landmark study. The primary aim of the CABANA Trial is to test the hypothesis that the treatment strategy of percutaneous left atrial catheter ablation for the purpose of eliminating atrial fibrillation (AF) is superior to current state-of-the-art therapy with either rate control or rhythm control drugs for reducing total mortality | An ablation trial evaluating overall mortality and major AF related events, conducted within a population at increased risk, will provide the most compelling evidence for guiding the therapy of this malady. The completion of the 60 patient CABANA Pilot Study provides solid evidence of the feasibility of this landmark study. The primary aim of the CABANA Trial is to test the hypothesis that the treatment strategy of percutaneous left atrial catheter ablation for the purpose of eliminating atrial fibrillation (AF) is superior to current state-of-the-art therapy with either rate control or rhythm control drugs for reducing: 1) total mortality, disabling stroke, serious bleeding, or cardiac arrest as the primary endpoint and 2) total mortality as the secondary endpoint in patients with untreated or incompletely treated AF. | DSMB suggested revisions to the primary and secondary outcomes |
| 1.1.2 /13<br>Progression of AF | There is also reason to anticipate an increasing impact of this arrhythmia on mortality.                                                                                                                                                                                                                                                                                                                                                                                                                                                                                                                                                | There is also reason to anticipate an increasing impact of this arrhythmia on mortality, stroke, bleeding and cardiac arrest.                                                                                                                                                                                                                                                                                                                                                                                                                                                                                                                                                                                                                                                                                                                                  | DSMB suggested revisions                                       |
| 1.4 /17                        | These studies taken together, along with                                                                                                                                                                                                                                                                                                                                                                                                                                                                                                                                                                                                | These studies taken together, along with                                                                                                                                                                                                                                                                                                                                                                                                                                                                                                                                                                                                                                                                                                                                                                                                                       | DSMB suggested                                                 |

|                                        |                                                                                                                                                                                         |                                                                                                                                                                                                                                                                                                                                                                                                                                                                                                                                                                                                                                                                                                                                                                                                                                                                                                                                                                                                                                                                                                                            |                                                |
|----------------------------------------|-----------------------------------------------------------------------------------------------------------------------------------------------------------------------------------------|----------------------------------------------------------------------------------------------------------------------------------------------------------------------------------------------------------------------------------------------------------------------------------------------------------------------------------------------------------------------------------------------------------------------------------------------------------------------------------------------------------------------------------------------------------------------------------------------------------------------------------------------------------------------------------------------------------------------------------------------------------------------------------------------------------------------------------------------------------------------------------------------------------------------------------------------------------------------------------------------------------------------------------------------------------------------------------------------------------------------------|------------------------------------------------|
| Rationale for Maintaining Sinus Rhythm | data from population-based studies, provide the rationale for a large, multi-center trial to prospectively examine the impact of sinus rhythm on overall mortality in patients with AF. | data from population-based studies, provide the rationale for a large, multi-center trial to prospectively examine the impact of sinus rhythm on <b>total mortality, disabling stroke, serious bleeding and cardiac arrest</b> in patients with AF.                                                                                                                                                                                                                                                                                                                                                                                                                                                                                                                                                                                                                                                                                                                                                                                                                                                                        | revisions                                      |
| 1.8 /19<br>Significance of the Trial   | Scientifically, the trial will determine whether the attainment of normal sinus rhythm is a mortality advantage.                                                                        | <b>This study will also assess the role of earlier therapy for AF and the related utility of ablation as first line therapy in patients warranting treatment.</b><br>Scientifically, the trial will determine whether the attainment of normal sinus rhythm is a mortality <b>and stroke</b> advantage.                                                                                                                                                                                                                                                                                                                                                                                                                                                                                                                                                                                                                                                                                                                                                                                                                    | DSMB suggested revisions                       |
| 2.0 /20<br>Objectives                  |                                                                                                                                                                                         | <b>Changes to the Protocol from the Original Study Design</b><br>Although CABANA was originally mandated to be a mortality trial, a careful assessment of the progress of the trial was undertaken by the study leadership in early 2013. Completely blinded to any treatment-specific outcome data, the two major issues addressed by the leadership group were (1) a lower than expected aggregated mortality rate, and (2) accrual of patients at a slower rate than projected. Careful consideration of these issues led to a decision to (a) change the primary endpoint of the trial from total mortality to the original key secondary endpoint consisting of the composite of death, disabling stroke, serious bleeding, or cardiac arrest, and (b) reduce the sample size to a number that was consistent with the new primary endpoint and more realistically achievable within the funding period of the trial. There may still be a mortality difference between treatment groups. This was not revealed in the interim review. These changes will be highlighted in the sections of the protocol that follow. | Clarity and overview of the protocol revisions |

|                                                                   |                                                                                                                                                                                                                                                                                                                                                                                                                                                                                                                                                                                                                                                                                                                                                                                                                  |                                                                                                                                                                                                                                                                                                                                                                                                                                                                                                                                                                                                                                                                                                                                                                                                                                                                                                                                                                                                                                                                                                                           |                                                           |
|-------------------------------------------------------------------|------------------------------------------------------------------------------------------------------------------------------------------------------------------------------------------------------------------------------------------------------------------------------------------------------------------------------------------------------------------------------------------------------------------------------------------------------------------------------------------------------------------------------------------------------------------------------------------------------------------------------------------------------------------------------------------------------------------------------------------------------------------------------------------------------------------|---------------------------------------------------------------------------------------------------------------------------------------------------------------------------------------------------------------------------------------------------------------------------------------------------------------------------------------------------------------------------------------------------------------------------------------------------------------------------------------------------------------------------------------------------------------------------------------------------------------------------------------------------------------------------------------------------------------------------------------------------------------------------------------------------------------------------------------------------------------------------------------------------------------------------------------------------------------------------------------------------------------------------------------------------------------------------------------------------------------------------|-----------------------------------------------------------|
| <p>2.1 /20<br/>Primary Objective and Hypothesis</p>               | <p>The primary hypothesis of the CABANA trial is that the treatment strategy of percutaneous left atrial catheter ablation for the purpose of eliminating atrial fibrillation (AF) is superior to current state-of-the-art medical therapy with either rate control or rhythm control drugs for reducing total mortality (primary endpoint) and decreasing the composite endpoint of total mortality, disabling stroke, serious bleeding, or cardiac arrest (key secondary endpoint) in patients with untreated or incompletely treated AF warranting therapy. It is anticipated that treatment with percutaneous left atrial catheter ablation will reduce mortality <math>\geq 30\%</math> compared to drug therapy. All endpoints will be carefully assessed and analyzed on an intention to treat basis.</p> | <p>The primary hypothesis of the CABANA trial is that the treatment strategy of percutaneous left atrial catheter ablation for the purpose of eliminating atrial fibrillation (AF) is superior to current state-of-the-art medical therapy with either rate control or rhythm control drugs for decreasing the <b>incidence of the composite endpoint of total mortality, disabling stroke, serious bleeding, or cardiac arrest (primary endpoint)</b> and reducing total mortality (<b>secondary endpoint</b>) in patients with untreated or incompletely treated AF warranting therapy. It is anticipated that treatment with percutaneous left atrial catheter ablation will reduce the incidence of this endpoint by <math>\geq 30\%</math> compared to drug therapy. <b>To properly interpret this composite endpoint, the incidence of each of the individual components will also be descriptively examined to assess its relative contribution to the overall composite outcome. The primary endpoint and all secondary endpoints will be carefully assessed and analyzed on an intention to treat basis.</b></p> | <p>DSMB suggested revisions to the primary outcomes</p>   |
| <p>2.2 /20<br/>Secondary Endpoints/Objectives</p>                 | <p>1. Total mortality, disabling stroke, serious bleeding, or cardiac arrest<br/>2. Total mortality or cardiovascular hospitalization</p>                                                                                                                                                                                                                                                                                                                                                                                                                                                                                                                                                                                                                                                                        | <p><b>1. Total mortality</b><br/><b>2. Total mortality or cardiovascular hospitalization</b><br/><b>3. Total mortality, stroke, or CV hospitalization (for heart failure or acute ischemic events)</b></p>                                                                                                                                                                                                                                                                                                                                                                                                                                                                                                                                                                                                                                                                                                                                                                                                                                                                                                                | <p>DSMB suggested revisions to the secondary outcomes</p> |
| <p>2.2.1 /21<br/><b>Composite Morbidity / Total Mortality</b></p> | <p>This trial will determine whether catheter ablation for the elimination of AF has an impact on the composite end point of total mortality, disabling stroke, serious bleeding, or cardiac arrest, when compared to drug therapy. This is the key secondary endpoint. The hypothesis regarding this endpoint is that catheter ablation for AF will result in a significant</p>                                                                                                                                                                                                                                                                                                                                                                                                                                 | <p><b>Because of the vital importance of assessing the impact of left atrial catheter ablation on total mortality, this endpoint (which is a component of the primary endpoint) will be a specific secondary endpoint in the trial.</b><br/><b>Hypothesis: Catheter ablation for AF will reduce total mortality by <math>\geq 30\%</math> compared to state-of-the-art pharmacologic therapy.</b></p>                                                                                                                                                                                                                                                                                                                                                                                                                                                                                                                                                                                                                                                                                                                     | <p>DSMB suggested revisions to the secondary outcomes</p> |

|                                                                         |                                                                                                                                                                                                                                                                                                                                                                                                                                                                                                                                   |                                                                                                                                                                                                                                                                                                                                                                                                                                                                                                                                                                                                                                                                                                                               |                                                                                        |
|-------------------------------------------------------------------------|-----------------------------------------------------------------------------------------------------------------------------------------------------------------------------------------------------------------------------------------------------------------------------------------------------------------------------------------------------------------------------------------------------------------------------------------------------------------------------------------------------------------------------------|-------------------------------------------------------------------------------------------------------------------------------------------------------------------------------------------------------------------------------------------------------------------------------------------------------------------------------------------------------------------------------------------------------------------------------------------------------------------------------------------------------------------------------------------------------------------------------------------------------------------------------------------------------------------------------------------------------------------------------|----------------------------------------------------------------------------------------|
|                                                                         | (>25%) reduction in the incidence of this composite endpoint. To detect the relative contribution of these component events, the incidence of each individual component will also be descriptively examined to aid in the interpretation of the composite outcome. Because of a mechanistic concordance of events, arrhythmic death and cardiac arrest will be considered together as a composite secondary endpoint. Cardiovascular death and disabling stroke will be similarly grouped.                                        |                                                                                                                                                                                                                                                                                                                                                                                                                                                                                                                                                                                                                                                                                                                               |                                                                                        |
| 2.2.2 /21<br>Composite Mortality /<br>Cardiovascular<br>Hospitalization | By reducing the recurrence of AF, the proposed therapies should also reduce cardiovascular hospitalization. Additional secondary endpoints, including cardiovascular hospitalization and the composite of total mortality and cardiovascular hospitalization, will therefore be examined. <i>Hypothesis:</i> Catheter ablation for AF will be significantly (>=25%) more effective than pharmacologic therapy, in reducing cardiovascular hospitalization and the composite of total mortality or cardiovascular hospitalization. | By reducing the recurrence of AF, the proposed therapies should also reduce cardiovascular hospitalization. Additional secondary endpoints, including cardiovascular hospitalization and the composite of total mortality and cardiovascular hospitalization, will therefore be examined. <b>The composite of total mortality, stroke or cardiovascular hospitalization will also be assessed.</b> <i>Hypothesis:</i> Catheter ablation for AF will be significantly (≥25%) more effective than pharmacologic therapy, in reducing cardiovascular hospitalization, the composite of total mortality or cardiovascular hospitalization, <b>and the composite of total mortality, stroke or cardiovascular hospitalization.</b> | DSMB suggested revisions to the secondary outcomes                                     |
| 2.2.4 /21<br>Freedom from<br>Recurrent Atrial<br>Fibrillation           | Time to second AF recurrence and AF burden will also be established.                                                                                                                                                                                                                                                                                                                                                                                                                                                              | Time to second AF recurrence and AF burden will also be established. <b>Freedom from AF after each ablation performed in an individual subject will be separately tracked.</b>                                                                                                                                                                                                                                                                                                                                                                                                                                                                                                                                                | Clarification as it relates to the tracking of recurrent AF for ablation therapy       |
| 3.1 /22<br>Inclusion Criteria                                           | 1. Have paroxysmal AF episodes ≥1 hour in duration; with ≥2 episodes over the preceding 6 months with <b><i>electrocardiographic documentation</i></b>                                                                                                                                                                                                                                                                                                                                                                            | 1. Over the preceding <b>6</b> months have a) paroxysmal AF episodes ( <b>that terminate spontaneously within 7 days or cardioversion is performed within 48h of</b>                                                                                                                                                                                                                                                                                                                                                                                                                                                                                                                                                          | Clarification of entry criteria and required documentation for each of the 3 AF types. |

|                               |                                                                                                                                                                                                                                                                                                                                                                                                                                                                                                                                                                                                                                                                 |                                                                                                                                                                                                                                                                                                                                                                                                                                                                                                                                                                                                                                                                                                                                                                                                                                                                                                                                                                                                                                                                                                                                                                                                                                                 |                                                                                                                                                                            |
|-------------------------------|-----------------------------------------------------------------------------------------------------------------------------------------------------------------------------------------------------------------------------------------------------------------------------------------------------------------------------------------------------------------------------------------------------------------------------------------------------------------------------------------------------------------------------------------------------------------------------------------------------------------------------------------------------------------|-------------------------------------------------------------------------------------------------------------------------------------------------------------------------------------------------------------------------------------------------------------------------------------------------------------------------------------------------------------------------------------------------------------------------------------------------------------------------------------------------------------------------------------------------------------------------------------------------------------------------------------------------------------------------------------------------------------------------------------------------------------------------------------------------------------------------------------------------------------------------------------------------------------------------------------------------------------------------------------------------------------------------------------------------------------------------------------------------------------------------------------------------------------------------------------------------------------------------------------------------|----------------------------------------------------------------------------------------------------------------------------------------------------------------------------|
|                               | <p>of at least 1 episode; or 1 persistent or longstanding persistent episode of AF lasting more than 1 week.</p> <p>2. Warrant active therapy beyond simple ongoing observation</p> <p>3. Be eligible for catheter ablation and <math>\geq 2</math> sequential rhythm control and/or <math>\geq 3</math> rate control drugs.</p> <p>4. Prior stroke, TIA or systemic emboli, Atherosclerotic vascular disease (previous MI, peripheral arterial disease or aortic plaque), LA size <math>&gt;50</math><br/>NOTE: providing they remain realistically eligible for <math>\geq 2</math> membrane active drugs and/or <math>\geq 3</math> rate control agents.</p> | <p><b>AF onset</b>): that is <math>\geq 1</math> hour in duration with <math>\geq 2</math> episodes with <b>electrocardiographic documentation</b> of at least 1 episode; or b) <b>electrocardiographic documentation</b> of 1 persistent AF episode: (sustained for <math>\geq 7</math> days or cardioversion is performed more than 48h after AF onset) or c) <b>electrocardiographic documentation</b> of 1 longstanding persistent AF episode: (continuous AF of duration <math>&gt;1</math> year).</p> <p>2. Warrant active therapy (<b>within the past 3 months</b>) beyond simple ongoing observation</p> <p>3. Be eligible for catheter ablation and <math>\geq 2</math> sequential rhythm control and/or <math>\geq 2</math> rate control drugs.</p> <p>4. Prior stroke, TIA or systemic emboli, Atherosclerotic vascular disease (previous MI, peripheral arterial disease or aortic plaque), LA size <math>&gt;50</math><br/>NOTE: providing they remain realistically eligible for <math>\geq 2</math> membrane active drugs and/or <math>\geq 2</math> rate control agents. <b>Patients receiving new drug therapy initiated within the previous 3 months may continue that therapy if randomized to the drug therapy arm.</b></p> | <p>To improve enrollment, the DSMB suggested the addition of CHADS-VASc criteria and decrease rate control drugs to <math>\geq 2</math>.</p> <p>Protocol clarification</p> |
| 3.2 /23<br>Exclusion Criteria | <p>4. More than one week of amiodarone treatment in the past 3 months</p> <p>5. An efficacy failure of full dose amiodarone treatment <math>\geq 12</math> weeks duration at any time.<br/>NOTE: Prior ablation of the cavo-tricuspid isthmus alone is not an exclusion if the patient develops subsequent recurrent AF. Planned atrial flutter ablation in combination with the left atrial ablation is not an exclusion.</p>                                                                                                                                                                                                                                  | <p><b>4. REMOVED</b></p> <p>4. An efficacy failure of full dose amiodarone treatment <math>\geq 8</math> weeks duration at any time.<br/>NOTE: <b>Exclusion Criterion #3 includes failed membrane active antiarrhythmic drugs started within 3 months prior to enrollment.</b> Prior ablation of the cavo-tricuspid isthmus alone is not an exclusion if the patient develops subsequent recurrent AF. Planned atrial flutter ablation in combination with the left atrial ablation is not an exclusion</p>                                                                                                                                                                                                                                                                                                                                                                                                                                                                                                                                                                                                                                                                                                                                     | <p>To enhance enrollment</p> <p>Protocol clarification</p>                                                                                                                 |
| 4.1 /23<br>Trial Design and   | <p>This multi-center study will randomize 3000 patients in a 1:1 fashion to a</p>                                                                                                                                                                                                                                                                                                                                                                                                                                                                                                                                                                               | <p>This multi-center study will randomize <b>2000-2200</b> patients in a 1:1 fashion to a</p>                                                                                                                                                                                                                                                                                                                                                                                                                                                                                                                                                                                                                                                                                                                                                                                                                                                                                                                                                                                                                                                                                                                                                   | <p>DSMB suggested to decrease the sample</p>                                                                                                                               |

|                                                       |                                                                                                                                                                                                                                                                                                                                                                                                                                                                                                                                         |                                                                                                                                                                                                                                                                                                                                                                                                                                                                                                                                     |                                                                                                                                    |
|-------------------------------------------------------|-----------------------------------------------------------------------------------------------------------------------------------------------------------------------------------------------------------------------------------------------------------------------------------------------------------------------------------------------------------------------------------------------------------------------------------------------------------------------------------------------------------------------------------------|-------------------------------------------------------------------------------------------------------------------------------------------------------------------------------------------------------------------------------------------------------------------------------------------------------------------------------------------------------------------------------------------------------------------------------------------------------------------------------------------------------------------------------------|------------------------------------------------------------------------------------------------------------------------------------|
| Time Line                                             | strategy of catheter ablation vs. state-of-the-art drug therapy for either rate or rhythm control, as outlined in Figure 2. Each will have untreated or incompletely treated AF, which in the opinion of the investigator warrants therapy. CABANA enrollment will occur over approximately 3 years, beginning in the 3 <sup>rd</sup> quarter of 2009. All CABANA patients will be followed a minimum of 2 years. Assuming criteria for early termination are not reached, the major trial results are expected to be reported in 2015. | strategy of catheter ablation vs. state-of-the-art drug therapy with either rate or rhythm control, as outlined in Figure 2. Each patient will have untreated or incompletely treated AF, which in the opinion of the investigator warrants therapy. CABANA enrollment will occur over approximately 4 years. All CABANA patients will be followed <b>an average of approximately 5 years</b> . Assuming criteria for early termination are not reached, the major trial results are expected to be reported in <b>early 2018</b> . | size                                                                                                                               |
| 4.2 /24<br>Screening and Pre-Randomization Procedures | The principal investigator or documented members of the research team will discuss the underlying rationale for the study<br><br>Work Productivity and Activity Impairment Instrument (WPAI), Stanford Presenteeism scale will be collected                                                                                                                                                                                                                                                                                             | The principal investigator or documented members of the research team <b>approved by local Institutional Review Board (IRB) or Ethics Committee (EC)</b> will discuss the underlying rationale for the study, Work Productivity and Activity Impairment Instrument (WPAI), Stanford Presenteeism scale <b>and Mayo AF Symptom Index (MAFSI))</b> will be collected                                                                                                                                                                  | Protocol clarification                                                                                                             |
| 4.4 /24<br>Post Randomization Procedures              | and patients followed for a minimum of approximately 2 years.                                                                                                                                                                                                                                                                                                                                                                                                                                                                           | and patients followed for <b>an average of approximately 5 years</b> .                                                                                                                                                                                                                                                                                                                                                                                                                                                              | DSMB suggested Extension of the follow-up                                                                                          |
| 4.4.1 /25<br>Baseline testing                         | up to 375 patients randomized to drug therapy will be asked to undergo one research CT/MR scan                                                                                                                                                                                                                                                                                                                                                                                                                                          | up to <b>150</b> patients randomized to drug therapy will be asked to undergo one research CT/MR scan                                                                                                                                                                                                                                                                                                                                                                                                                               | Recalculation of numbers to meet objectives                                                                                        |
| 4.4.2 /25<br>Patient Follow Up                        | A brief Follow up Questionnaire capturing atrial fibrillation severity and symptoms, work productivity/activity/presenteeism will be collected at 6, 18, 30, and 42 months post randomization.<br><br>Follow-up visits/calls should be completed within 30 days +/- of the due date<br><br>asking 5 brief questions and Mayo Atrial Fibrillation Symptom Index (MAFSI) will                                                                                                                                                             | <b>REMOVED</b><br><br>Follow-up visits/calls at <b>3 and 6 months</b> should be completed within 30 days +/- of the due date<br><b>Follow-up visits/calls at 12 months and every 6 months thereafter should be completed within 60 days +/- of the due date (Ex: 12 month visit: completed between 300 days and 420 days of randomization).</b><br>asking 5 brief questions and Mayo Atrial Fibrillation Symptom Index (MAFSI) will be collected by the Site Coordinator at <b>3</b>                                                | Extension of the follow-up window to allow more flexibility<br><br>Reduction in number of surveys/patient to reduce subject burden |

|           |                                                                                                                                                                                                                                                                                                                                                                                                                                                                                              |                                                                                                                                                                                                                                                                                                                                                                                                                                                                                                                                                                                                                                                                                                                                                                                                                                                                                                                                                                                                                                                                                                                                                                                                                                                                                                                                                                                                                                                                                                             |                                                                                                                                                                                                                                                                                                                                                                                                                                                                                                 |
|-----------|----------------------------------------------------------------------------------------------------------------------------------------------------------------------------------------------------------------------------------------------------------------------------------------------------------------------------------------------------------------------------------------------------------------------------------------------------------------------------------------------|-------------------------------------------------------------------------------------------------------------------------------------------------------------------------------------------------------------------------------------------------------------------------------------------------------------------------------------------------------------------------------------------------------------------------------------------------------------------------------------------------------------------------------------------------------------------------------------------------------------------------------------------------------------------------------------------------------------------------------------------------------------------------------------------------------------------------------------------------------------------------------------------------------------------------------------------------------------------------------------------------------------------------------------------------------------------------------------------------------------------------------------------------------------------------------------------------------------------------------------------------------------------------------------------------------------------------------------------------------------------------------------------------------------------------------------------------------------------------------------------------------------|-------------------------------------------------------------------------------------------------------------------------------------------------------------------------------------------------------------------------------------------------------------------------------------------------------------------------------------------------------------------------------------------------------------------------------------------------------------------------------------------------|
|           | <p>be collected by the Site Coordinator at each follow up visit throughout the trial and entered into the e-CRF.</p> <p>All patients enrolled will receive a single 'CABANA Box' recording system to be used for both patient activated event monitoring (throughout the trial), autodetect/autocapture (AD:AC) event monitoring (one 24 hour period/month) and full disclosure Holter monitoring for 96 hours every 6 months throughout the study.</p> <p>The 375 drug therapy patients</p> | <p>and 12 months following randomization during the first year and yearly thereafter throughout the trial and entered into the e-CRF.</p> <p>After enrollment, subjects will either receive a single 'CABANA Box' recording system to be used throughout the entire study, or will be followed using ambulatory event and Holter ECG monitoring as generated during the course of routine clinical care as dictated by their attending physician.</p> <p>At sites where the 'CABANA Box' has received appropriate approval, all patients enrolled will receive a single 'CABANA Box' recording system to be used for both patient activated event monitoring (throughout the trial), 24 hour autodetect/autocapture (AD:AC) event monitoring and 96 hour full disclosure Holter monitoring throughout the study.</p> <p>During year one, subjects will be asked to record their heart rhythm each month. After the first year, they will be asked for a 24 hour recording twice a year and a 96 hour recording twice a year.</p> <p>Follow up monitoring with an alternative system will be required in centers unable to use the "CABANA Box".</p> <p>The 150 drug therapy patients</p> <p>After completion of the 60 month follow-up, subjects will be asked to extend their participation. If agreed upon, subjects will be asked about their current state of health and any clinical events every 6 months by telephone until the last subject enrolled reaches approximately 36 months follow-up.</p> | <p>The Medicomp monitoring system will only be utilized at Institutions or within countries where appropriate approvals have been obtained. Routine monitoring based on clinical care will be recorded within the trial database records.</p> <p>To decrease subject burden, use of the heart monitor (CABANA Box) has been reduced.</p> <p>Recalculation of numbers to meet objectives.</p> <p>Extended follow-up to achieve an approximate trial wide follow-up of an average of 5 years.</p> |
| 4.4.3 /27 |                                                                                                                                                                                                                                                                                                                                                                                                                                                                                              | Updated Schedule of Assessment                                                                                                                                                                                                                                                                                                                                                                                                                                                                                                                                                                                                                                                                                                                                                                                                                                                                                                                                                                                                                                                                                                                                                                                                                                                                                                                                                                                                                                                                              | Clarification                                                                                                                                                                                                                                                                                                                                                                                                                                                                                   |

|                                                           |                                                                                                                                                                                                                                                                                                                                                                                                                                                                                                         |                                                                                                                                                                                                                                                                                                                                                                                                                                                                                                                                                                                                                                                                                                                                                                                                                                                                                                                                                                                                                                                                                                                                                                                                                                                                                                                                                                                                         |                                                                                                                                           |
|-----------------------------------------------------------|---------------------------------------------------------------------------------------------------------------------------------------------------------------------------------------------------------------------------------------------------------------------------------------------------------------------------------------------------------------------------------------------------------------------------------------------------------------------------------------------------------|---------------------------------------------------------------------------------------------------------------------------------------------------------------------------------------------------------------------------------------------------------------------------------------------------------------------------------------------------------------------------------------------------------------------------------------------------------------------------------------------------------------------------------------------------------------------------------------------------------------------------------------------------------------------------------------------------------------------------------------------------------------------------------------------------------------------------------------------------------------------------------------------------------------------------------------------------------------------------------------------------------------------------------------------------------------------------------------------------------------------------------------------------------------------------------------------------------------------------------------------------------------------------------------------------------------------------------------------------------------------------------------------------------|-------------------------------------------------------------------------------------------------------------------------------------------|
| <p>5.4 /32<br/>Guidelines for Anti-thrombotic Therapy</p> | <p>(warfarin, dabigatran)<br/>These agents may be used as replacement therapy for warfarin on approval of Innovative Antithrombotic Therapies/Executive Committees.</p>                                                                                                                                                                                                                                                                                                                                 | <p>(warfarin, dabigatran, rivaroxiban or apixaban)<br/>These agents may be used as replacement therapy for warfarin on approval of local regulatory agencies and the Innovative Antithrombotic Therapies/Executive Committees.</p>                                                                                                                                                                                                                                                                                                                                                                                                                                                                                                                                                                                                                                                                                                                                                                                                                                                                                                                                                                                                                                                                                                                                                                      | <p>Innovative Drug Therapy committee approved new anticoagulation drugs for use within CABANA</p>                                         |
| <p>6.1 /33<br/>Primary Endpoints</p>                      | <p>The primary endpoint event of mortality, will be adjudicated by an independent Clinical Events Committee (CEC) and the most proximate cause of that event established. The CEC will also confirm whether a death is cardiac/vascular/non-cardiovascular in origin; as well as witnessed/un-witnessed; or sudden/non-sudden. Cardiac mortality will be further categorized as tachyarrhythmic, bradyarrhythmic, heart failure, or due to other cardiac causes using the events adjudication form.</p> | <p>The primary endpoint is the composite of total mortality, disabling stroke, serious bleeding or cardiac arrest. All components will be adjudicated by an independent Clinical Events Committee (CEC) and the most proximate cause of the event established. A Disabling Stroke will be considered present using a modification of a Rankin Stroke score [100], and will be adjudicated by a Neurologic Events Committee. Serious (or Life-threatening) bleeding will be considered present using a modification of the GUSTO bleeding Scale adapted for use in catheter ablation [101]. These events will be tracked regardless of treatment randomization. The definition for each of these events is listed in the CEC Charter. When there is disagreement between the CEC and the principal investigator, the CEC's decision will be considered final. Procedures for adjudicating events are described in the CEC Charter, which is available upon request. The CEC will also confirm whether a death is cardiac/vascular/non-cardiovascular in origin; as well as witnessed/un-witnessed; or sudden/non-sudden. Cardiac mortality will be further categorized as tachyarrhythmic, bradyarrhythmic, heart failure, or due to other cardiac causes using the events adjudication form. Hospitalization will also be tracked with specific reason for admission (heart failure, acute ischemic</p> | <p>DSMB suggested revisions to the primary outcomes</p> <p>Placement within protocol changed</p> <p>Placement within protocol changed</p> |



|                                                   |                                                                                                                                                                                                                                                                                                                                                                                                                                                                                                                                                                                                                                                                                                                                                                                                                                                                                                                                                                                   |                                                                                                                                                                                                                                                                                                                                                                                     |                                                                                                                                                      |
|---------------------------------------------------|-----------------------------------------------------------------------------------------------------------------------------------------------------------------------------------------------------------------------------------------------------------------------------------------------------------------------------------------------------------------------------------------------------------------------------------------------------------------------------------------------------------------------------------------------------------------------------------------------------------------------------------------------------------------------------------------------------------------------------------------------------------------------------------------------------------------------------------------------------------------------------------------------------------------------------------------------------------------------------------|-------------------------------------------------------------------------------------------------------------------------------------------------------------------------------------------------------------------------------------------------------------------------------------------------------------------------------------------------------------------------------------|------------------------------------------------------------------------------------------------------------------------------------------------------|
|                                                   |                                                                                                                                                                                                                                                                                                                                                                                                                                                                                                                                                                                                                                                                                                                                                                                                                                                                                                                                                                                   | event, etc) determined by the site principal investigator as reported in the eCRF.                                                                                                                                                                                                                                                                                                  |                                                                                                                                                      |
| 6.2 /34<br>Secondary Endpoints & Safety Endpoints | <p>Secondary endpoint events, including composite endpoints of total mortality, disabling stroke, serious bleeding, or cardiac arrest will be confirmed and adjudicated in a similar manner by the CEC.</p> <p>A Disabling Stroke will be considered present using a modification of a Rankin Stroke score [100], and will be adjudicated by a Neurologic Events Committee. Serious (or Life-threatening) bleeding will be considered present using a modification of the GUSTO bleeding Scale adapted for use in catheter ablation [101]. These events will be tracked regardless of treatment randomization. The definition for each of these events is listed in the CEC Charter. When there is disagreement between the CEC and the principal investigator, the CEC's decision will be considered final. Procedures for adjudicating events are described in the CEC Charter, which is available upon request.</p> <p>While hospitalization for AF in both treatment arms</p> | <p>Secondary endpoint events, including total mortality <b>and a composite of total mortality or cardiovascular hospitalization</b> will be confirmed.</p> <p>REMOVED</p> <p>While hospitalization for <b>any atrial fibrillation, atrial flutter or atrial tachycardia</b> in both treatment arms</p>                                                                              | DSMB suggested revisions to the secondary outcomes. Secondary endpoints as listed will be confirmed but not adjudicated by the CEC.                  |
| 7.1.1 /35<br>Anticipated Adverse Events           | A listing of 'anticipated/expected' events can be found in Appendix A. An unanticipated/unexpected adverse event is any adverse event that has not been reported in previous studies, published literature, or product labeling (see appendix A).                                                                                                                                                                                                                                                                                                                                                                                                                                                                                                                                                                                                                                                                                                                                 | A listing of <b>commonly occurring</b> 'anticipated/expected' events <b>in the population being studied</b> can be found in Appendix A. An unanticipated/unexpected adverse event is any adverse event that has not been reported in previous studies, published literature, product labeling, <b>or which is not anticipated in the population being studied</b> (see appendix A). | The text had been updated to provide additional guidance and clarifications to the investigators for the assessment and reporting of adverse events. |
| 7.3 /36                                           | DCRI will report all unanticipated/                                                                                                                                                                                                                                                                                                                                                                                                                                                                                                                                                                                                                                                                                                                                                                                                                                                                                                                                               | DCRI will report all unanticipated/                                                                                                                                                                                                                                                                                                                                                 |                                                                                                                                                      |

|                                                                |                                                                                                                                                                                                                                                                                                                                                                                                                                                                                                                                                                                                                                                                                                                                                                                                                                                     |                                                                                                                                                                                                                                                                                                                                                                                                                                                                                                                                                                                                                                                                                                                                                                                                                                                                                                                                                                                              |                                                                                                                             |
|----------------------------------------------------------------|-----------------------------------------------------------------------------------------------------------------------------------------------------------------------------------------------------------------------------------------------------------------------------------------------------------------------------------------------------------------------------------------------------------------------------------------------------------------------------------------------------------------------------------------------------------------------------------------------------------------------------------------------------------------------------------------------------------------------------------------------------------------------------------------------------------------------------------------------------|----------------------------------------------------------------------------------------------------------------------------------------------------------------------------------------------------------------------------------------------------------------------------------------------------------------------------------------------------------------------------------------------------------------------------------------------------------------------------------------------------------------------------------------------------------------------------------------------------------------------------------------------------------------------------------------------------------------------------------------------------------------------------------------------------------------------------------------------------------------------------------------------------------------------------------------------------------------------------------------------|-----------------------------------------------------------------------------------------------------------------------------|
| Serious Adverse Event Reporting                                | unexpected adverse events to Mayo Clinic and the DSMB chair                                                                                                                                                                                                                                                                                                                                                                                                                                                                                                                                                                                                                                                                                                                                                                                         | unexpected <b>study related</b> serious adverse events to Mayo Clinic, <b>NHLBI</b> and the DSMB chair                                                                                                                                                                                                                                                                                                                                                                                                                                                                                                                                                                                                                                                                                                                                                                                                                                                                                       |                                                                                                                             |
| 7.4.1 /37<br>Expedited events include                          | <b>Events of Interest (EOI):</b> Drug or ablation therapy or ablation procedure related events (index and/or follow-up): All events that resulted in death, pro-arrhythmic events, myocardial perforation / tamponade requiring intervention, esophageal atrial fistula, and/or severe pulmonary vein stenosis that were life threatening or classified as severe in nature.                                                                                                                                                                                                                                                                                                                                                                                                                                                                        | <b>Events of Interest (EOI):</b> Drug or ablation therapy or ablation procedure related events (index and/or follow-up): <b>The related</b> events that resulted in death, <b>and the following events if they are life-threatening or severe in nature;</b> pro-arrhythmic events, myocardial perforation / tamponade requiring intervention, esophageal atrial fistula, and/or severe pulmonary vein stenosis that were life threatening or classified as severe in nature.                                                                                                                                                                                                                                                                                                                                                                                                                                                                                                                |                                                                                                                             |
| 7.6.2 /38<br>CABANA Reporting of Drug or Device Adverse Events | For CABANA trial purposes, adverse events will be reported through the eCRF submission process designed to facilitate notification to DCRI Safety Surveillance and/or their designee.<br><br>The DCRI Safety Surveillance Medical Monitor (a physician trained and experienced in safety reporting) will review all SAEs for potential expected/unexpected; anticipated/unanticipated status. The decision regarding ultimate classification will be made by <b>individuals within CABANA Leadership</b> with expertise in antiarrhythmia and ablation therapies and clinical trial experience. DCRI Safety Surveillance will notify the NIH within 1-2 business days of an unexpectedness/unanticipated event<br><br>DCRI Safety Surveillance will notify the NIH within 5 business days of all reported Events of Interest (as identified above). | For CABANA trial purposes, adverse events will be reported through the eCRF submission process designed to facilitate notification to DCRI Safety Surveillance and/or their designee. <b>DCRI Safety Surveillance will review and code all SAEs.</b><br>The Safety Surveillance Medical Monitor (a physician trained and experienced in safety reporting) will review <b>Events of Interest, and unexpected/unanticipated SAEs related to ablation therapy or CABANA approved rate or rhythm control drugs.</b> The decision regarding ultimate classification will be made by <b>individuals within CABANA Leadership</b> with expertise in antiarrhythmia and ablation therapies and clinical trial experience. DCRI Safety Surveillance will notify the <b>NHLBI and Mayo</b> within 1-2 business days of an unexpectedness/unanticipated event<br>DCRI Safety Surveillance will notify the <b>NHLBI</b> within 5 business days of all reported Events of Interest (as identified above). | The text had been updated to clarify the process followed by DCRI Safety Surveillance for the assessment of adverse events. |
| 8.1 /39                                                        | Second, important secondary endpoints                                                                                                                                                                                                                                                                                                                                                                                                                                                                                                                                                                                                                                                                                                                                                                                                               | Second, important secondary endpoints                                                                                                                                                                                                                                                                                                                                                                                                                                                                                                                                                                                                                                                                                                                                                                                                                                                                                                                                                        | Reporting of new                                                                                                            |

|                                             |                                                                                                                                                                                                                                                                                                                                                                                                                                                                        |                                                                                                                                                                                                                                                                                                                                                                                                                                                                                                                                                                                                                                                                                                                                                                                                                                                                                                                                                                                                                                                                                                                                                                                                                                                                                                                                                                                                                                                                 |                                                                      |
|---------------------------------------------|------------------------------------------------------------------------------------------------------------------------------------------------------------------------------------------------------------------------------------------------------------------------------------------------------------------------------------------------------------------------------------------------------------------------------------------------------------------------|-----------------------------------------------------------------------------------------------------------------------------------------------------------------------------------------------------------------------------------------------------------------------------------------------------------------------------------------------------------------------------------------------------------------------------------------------------------------------------------------------------------------------------------------------------------------------------------------------------------------------------------------------------------------------------------------------------------------------------------------------------------------------------------------------------------------------------------------------------------------------------------------------------------------------------------------------------------------------------------------------------------------------------------------------------------------------------------------------------------------------------------------------------------------------------------------------------------------------------------------------------------------------------------------------------------------------------------------------------------------------------------------------------------------------------------------------------------------|----------------------------------------------------------------------|
| <p>Sample Size and Power Considerations</p> | <p>were considered, including the key composite endpoint of death, disabling stroke, serious bleeding, or cardiac arrest.</p> <p>crossovers of drug-arm patients to receive ablation will have the impact of reducing the mortality rate of patients</p> <p>If we assume that patients who cross over receive a similar reduction in mortality as the benefit hypothesized for patients initially randomized to ablation, the 3.5 year control-arm event rate will</p> | <p>were considered.</p> <p>As described in Section 2.0, the study was originally designed with total mortality as the primary endpoint. However, in early 2013 a careful assessment of the progress of the trial was undertaken by the study leadership. Completely blinded to any treatment-specific outcome data, the two major issues addressed by the leadership group were (1) a lower than expected aggregated mortality rate, and (2) accrual of patients at a rate much slower than projected. Careful consideration of these issues led to a decision to (a) change the primary endpoint of the trial from total mortality to the key secondary endpoint consisting of the composite of death, disabling stroke, serious bleeding, or cardiac arrest, and (b) reduce the sample size to a number that was consistent with the new primary endpoint. The following paragraphs, which outlined the key considerations in determining the original sample size, are also relevant for the revised sample size.</p> <p>the most reliable estimates of mortality and other endpoint events applicable to the drug arm of CABANA</p> <p>With the original secondary endpoint elevated to become the primary endpoint, the incidence of the new primary endpoint is expected to be higher than the mortality rates.</p> <p>crossovers of drug-arm patients to receive ablation will have the impact of reducing the event rate of patients</p> <p>REMOVED</p> | <p>calculations based on revised primary and secondary endpoints</p> |
|---------------------------------------------|------------------------------------------------------------------------------------------------------------------------------------------------------------------------------------------------------------------------------------------------------------------------------------------------------------------------------------------------------------------------------------------------------------------------------------------------------------------------|-----------------------------------------------------------------------------------------------------------------------------------------------------------------------------------------------------------------------------------------------------------------------------------------------------------------------------------------------------------------------------------------------------------------------------------------------------------------------------------------------------------------------------------------------------------------------------------------------------------------------------------------------------------------------------------------------------------------------------------------------------------------------------------------------------------------------------------------------------------------------------------------------------------------------------------------------------------------------------------------------------------------------------------------------------------------------------------------------------------------------------------------------------------------------------------------------------------------------------------------------------------------------------------------------------------------------------------------------------------------------------------------------------------------------------------------------------------------|----------------------------------------------------------------------|

|  |                                                                                                                                                                                                                                                                                                                                                                                                                                                                                                                                                                                                                                                                                                                                                                                                                                                                                                                                                                                                                                                                                                                                                                                                                                                                                                                                                                                                                                                                                                                                                                      |                                                                                                                                                                                                                                                                                                                                                                                                                                                                                                                                                                                                                                                                                                                                                                                                                                                                                                                                                                                                                                                                                                                                                                                                                                                                                                                                                                                                                                                                                                           |  |
|--|----------------------------------------------------------------------------------------------------------------------------------------------------------------------------------------------------------------------------------------------------------------------------------------------------------------------------------------------------------------------------------------------------------------------------------------------------------------------------------------------------------------------------------------------------------------------------------------------------------------------------------------------------------------------------------------------------------------------------------------------------------------------------------------------------------------------------------------------------------------------------------------------------------------------------------------------------------------------------------------------------------------------------------------------------------------------------------------------------------------------------------------------------------------------------------------------------------------------------------------------------------------------------------------------------------------------------------------------------------------------------------------------------------------------------------------------------------------------------------------------------------------------------------------------------------------------|-----------------------------------------------------------------------------------------------------------------------------------------------------------------------------------------------------------------------------------------------------------------------------------------------------------------------------------------------------------------------------------------------------------------------------------------------------------------------------------------------------------------------------------------------------------------------------------------------------------------------------------------------------------------------------------------------------------------------------------------------------------------------------------------------------------------------------------------------------------------------------------------------------------------------------------------------------------------------------------------------------------------------------------------------------------------------------------------------------------------------------------------------------------------------------------------------------------------------------------------------------------------------------------------------------------------------------------------------------------------------------------------------------------------------------------------------------------------------------------------------------------|--|
|  | <p>drop from 15% to approximately 12-13%. The treatment effect will also be reduced.<br/>the method of Schoenfeld [104].</p> <p>To provide an adequate number of patients in the trial that will be relatively robust under various assumptions regarding the control-arm event rates and the magnitude of the treatment benefit, 3,000 patients will be enrolled. This number will provide 90% power for detecting a 30% mortality reduction, allowing for a 2% loss to follow-up. Thus, the study will have high power for detecting an important benefit if the control arm event rate is consistent with or even slightly lower than expected based on previous studies. This number will also provide power &gt; 80% for detecting a 25% reduction in mortality with ablation if the 3.5-year event rate in the drug arm is 13% or higher. Thus we have good power for detecting a more conservative estimate of the mortality benefit if the control arm event rate is consistent with previous studies. A 25-30% mortality reduction will be highly important from a clinical and public health standpoint, given the large population of patients in this country and throughout the world who suffer from AF. Since the event rates for the key composite secondary endpoint will be higher than the primary mortality endpoint, 3000 patients will also provide &gt;90% power for detecting a 25% reduction in the important secondary endpoint consisting of the composite of total mortality, disabling stroke, serious bleeding, or cardiac arrest.</p> | <p>the method of Schoenfeld [104] developed for the proportional hazards model.</p> <p>To provide an adequate number of patients in the trial that will be relatively robust under various assumptions regarding the control-arm event rates and the magnitude of the treatment benefit, 2,000-2,200 patients will be enrolled. With a minimum follow-up of 3 years (amounting to an average follow-up of approximately 5 years), 2200 patients will provide 90% power for detecting a 30% reduction in the new primary endpoint, and 2000 patients will provide 80% power, assuming a 3-year event rate in the drug arm of 12% and allowing for a 2% loss to follow-up. Thus, the study will have high power for detecting an important benefit if the control arm event rate is consistent with the rate expected based on previous studies. A sample size in this range will also provide acceptable power (86% with 2200 patients and 82% with 2000 patients) for detecting a 25% reduction with ablation in the primary endpoint if the 3-year drug arm event rate is 15%. Thus we will have good power for detecting a more conservative estimate of the benefit in the composite endpoint if the control arm event rate is higher, but still consistent with previous studies. A 25-30% reduction in primary events will be highly important from a clinical and public health standpoint, given the large population of patients in this country and throughout the world who suffer from AF.</p> |  |
|--|----------------------------------------------------------------------------------------------------------------------------------------------------------------------------------------------------------------------------------------------------------------------------------------------------------------------------------------------------------------------------------------------------------------------------------------------------------------------------------------------------------------------------------------------------------------------------------------------------------------------------------------------------------------------------------------------------------------------------------------------------------------------------------------------------------------------------------------------------------------------------------------------------------------------------------------------------------------------------------------------------------------------------------------------------------------------------------------------------------------------------------------------------------------------------------------------------------------------------------------------------------------------------------------------------------------------------------------------------------------------------------------------------------------------------------------------------------------------------------------------------------------------------------------------------------------------|-----------------------------------------------------------------------------------------------------------------------------------------------------------------------------------------------------------------------------------------------------------------------------------------------------------------------------------------------------------------------------------------------------------------------------------------------------------------------------------------------------------------------------------------------------------------------------------------------------------------------------------------------------------------------------------------------------------------------------------------------------------------------------------------------------------------------------------------------------------------------------------------------------------------------------------------------------------------------------------------------------------------------------------------------------------------------------------------------------------------------------------------------------------------------------------------------------------------------------------------------------------------------------------------------------------------------------------------------------------------------------------------------------------------------------------------------------------------------------------------------------------|--|

|                                               |                                                                                                                                                                                                                                                                                                                                                                                                                                                                                                                                                                                                                                                                                                                                                                                                                                                                                                                                                                                                                                                                                                                                                                                             |                                                                                                                                                                                                                                                                                                                                                                                                                                                                                                                                                                                                                                                                                                                                                                                                                                                                                                                                                                                                                                                                                                                                                                                                  |                                                                      |
|-----------------------------------------------|---------------------------------------------------------------------------------------------------------------------------------------------------------------------------------------------------------------------------------------------------------------------------------------------------------------------------------------------------------------------------------------------------------------------------------------------------------------------------------------------------------------------------------------------------------------------------------------------------------------------------------------------------------------------------------------------------------------------------------------------------------------------------------------------------------------------------------------------------------------------------------------------------------------------------------------------------------------------------------------------------------------------------------------------------------------------------------------------------------------------------------------------------------------------------------------------|--------------------------------------------------------------------------------------------------------------------------------------------------------------------------------------------------------------------------------------------------------------------------------------------------------------------------------------------------------------------------------------------------------------------------------------------------------------------------------------------------------------------------------------------------------------------------------------------------------------------------------------------------------------------------------------------------------------------------------------------------------------------------------------------------------------------------------------------------------------------------------------------------------------------------------------------------------------------------------------------------------------------------------------------------------------------------------------------------------------------------------------------------------------------------------------------------|----------------------------------------------------------------------|
|                                               |                                                                                                                                                                                                                                                                                                                                                                                                                                                                                                                                                                                                                                                                                                                                                                                                                                                                                                                                                                                                                                                                                                                                                                                             | This number of patients (2,000-2,200) will also provide adequate power for detecting a 25% reduction in other important secondary composite endpoints listed in section 2.2 such as the endpoints that involve cardiovascular hospitalization where the incidence is expected to be higher than for the primary endpoint.                                                                                                                                                                                                                                                                                                                                                                                                                                                                                                                                                                                                                                                                                                                                                                                                                                                                        |                                                                      |
| 8.2.1 /41<br>Analysis of the Primary Endpoint | The log-rank test will be the primary analytic tool for comparing mortality differences between the two therapies. Kaplan-Meier estimates of cumulative mortality rates as a function of follow-up time will be calculated and displayed. Relative risks will be expressed as hazard ratios with 95% confidence intervals generated using the Cox proportional hazards model. Supplementary analysis involving covariate adjustment will be performed with the Cox model. Such adjustment will be limited to a relatively small, prospectively defined set of patient characteristics that are known <i>a priori</i> to have a strong prognostic relationship with mortality. The covariate-adjusted analysis will serve as a prelude to supplementary analyses examining differential treatment effects. The covariates will include age, sex, race, heart failure class, presence/absence of structural heart disease, whether the patients' AF is paroxysmal, persistent or long-standing persistent, duration of AF, presence/absence of hypertension, and ejection fraction. Cox model analyses may also be performed using appropriate groupings of sites as a stratification factor. | The log-rank test will be the primary analytic tool for comparing outcome differences between the two therapies. Kaplan-Meier estimates of cumulative event rates as a function of follow-up time will be calculated and displayed. Relative risks will be expressed as hazard ratios with 95% confidence intervals generated using the Cox proportional hazards model. Supplementary analysis involving covariate adjustment will be performed with the Cox model. Such adjustment will be limited to a relatively small, prospectively defined set of patient characteristics that are known <i>a priori</i> to have a strong prognostic relationship with the primary endpoint. The covariate-adjusted analysis will serve as a prelude to supplementary analyses examining differential treatment effects. The covariates will include age, sex, race, heart failure class, presence/absence of structural heart disease, whether the patients' AF is paroxysmal, persistent or long-standing persistent, duration of AF, presence/absence of hypertension, and ejection fraction. Cox model analyses may also be performed using appropriate groupings of sites as a stratification factor. | Language revised based on change in primary and secondary endpoints. |
| 8.2.2 /41<br>Analysis of Secondary Endpoints  | Secondary endpoints including the important mortality/morbidity composite endpoint consisting of death, disabling                                                                                                                                                                                                                                                                                                                                                                                                                                                                                                                                                                                                                                                                                                                                                                                                                                                                                                                                                                                                                                                                           | Secondary endpoints, including total mortality and secondary endpoints 2 through 9 listed in Section 2.2, will all                                                                                                                                                                                                                                                                                                                                                                                                                                                                                                                                                                                                                                                                                                                                                                                                                                                                                                                                                                                                                                                                               | Language revised based on change in primary and secondary endpoints. |

|                                           |                                                                                                                                                                                                                                                                                                                              |                                                                                                                                                                                                                                                                                                                                                                                                                                                                                                                                                                                 |                                                                      |
|-------------------------------------------|------------------------------------------------------------------------------------------------------------------------------------------------------------------------------------------------------------------------------------------------------------------------------------------------------------------------------|---------------------------------------------------------------------------------------------------------------------------------------------------------------------------------------------------------------------------------------------------------------------------------------------------------------------------------------------------------------------------------------------------------------------------------------------------------------------------------------------------------------------------------------------------------------------------------|----------------------------------------------------------------------|
|                                           | stroke, serious bleeding, or cardiac arrest, and secondary endpoints 2 through 8 listed in Section 2.2 all involve time-to-event analyses and thus will be analyzed similar to the primary endpoint using the log-rank test, Cox model, and Kaplan-Meier event rate estimates                                                | involve time-to-event analyses and thus will be analyzed similar to the primary endpoint using the log-rank test, Cox model, and Kaplan-Meier event-rate estimates.                                                                                                                                                                                                                                                                                                                                                                                                             |                                                                      |
| 8.2.6 /43<br>Interim Analyses             | interpretation of statistical significance associated with treatment comparisons of key study endpoints will be guided using the group sequential stopping boundaries outlined above. After approximately 25% of the total events have occurred, conditional power for the primary treatment comparison                      | interpretation of statistical significance associated with treatment comparisons will be guided using the group sequential <b>monitoring</b> boundaries outlined above. After approximately 50% of the total events have occurred, conditional power for the primary treatment comparison                                                                                                                                                                                                                                                                                       | Language revised based on change in primary and secondary endpoints. |
| 8.2.7 /44<br>Multiple Comparisons         | overall level of significance for the assessment of the primary mortality endpoint will be 0.05,                                                                                                                                                                                                                             | overall level of significance for the assessment of the primary <b>composite</b> endpoint will be 0.05,                                                                                                                                                                                                                                                                                                                                                                                                                                                                         | Language revised based on change in primary and secondary endpoints. |
| 11.1 /47<br>Site Selection and Monitoring | As part of a concerted effort to follow the study in a detailed and orderly manner in accordance with established principles of Good Clinical Practice and applicable regulations, a DCRI study monitor or their designee will visit study sites regularly. They will maintain frequent telephone and written communication. | As part of a concerted effort to follow the study in a detailed and orderly manner in accordance with established principles of Good Clinical Practice and applicable regulations, <b>the Monitoring Plan is being revised with Executive Committee approval.</b> A DCRI study monitor or their designee will <b>no longer perform on-site visits to Active study sites regularly and throughout the study.</b> Rather they will maintain frequent telephone and written communication, <b>as well as perform on-site visits to a subset of sites to ensure data integrity.</b> | Accurate communication of the Site monitoring process.               |
| 18.0 /50<br>Informed Consent              | obtain written informed consent. The underlying rationale for the study, the procedures to be followed, the potential benefits, risks, alternatives, and other issues mandated by the consent process will be fully disclosed.                                                                                               | obtain written informed consent <b>on an informed consent form (ICF) approved by the same IRB/EC responsible for approval of this protocol. The informed consent document will conform to FDA regulations in 21 CFR Part 50, and/or to the national requirements for informed consent. It must include all elements required by law, local regulations, GCP and International Conference on</b>                                                                                                                                                                                 | Language revised/ inserted for regulatory compliance                 |

|                                                     |                                                                                                                                                                                                                                                                                                                                                                                                                                                                                                                                                                                                                                                                                                       |                                                                                                                                                                                                                                                                                                                                                                                                                                                                                                                                                                                                                                                                                                                                                                                     |                                                                                                                                                                       |
|-----------------------------------------------------|-------------------------------------------------------------------------------------------------------------------------------------------------------------------------------------------------------------------------------------------------------------------------------------------------------------------------------------------------------------------------------------------------------------------------------------------------------------------------------------------------------------------------------------------------------------------------------------------------------------------------------------------------------------------------------------------------------|-------------------------------------------------------------------------------------------------------------------------------------------------------------------------------------------------------------------------------------------------------------------------------------------------------------------------------------------------------------------------------------------------------------------------------------------------------------------------------------------------------------------------------------------------------------------------------------------------------------------------------------------------------------------------------------------------------------------------------------------------------------------------------------|-----------------------------------------------------------------------------------------------------------------------------------------------------------------------|
|                                                     | <p>Written informed consent will be documented on an informed consent form (ICF) approved by the same IRB responsible for approval of this protocol, The ICF will conform to FDA regulations in 21 CFR Part 50, and to the institutional requirements for informed consent and applicable regulations.</p>                                                                                                                                                                                                                                                                                                                                                                                            | <p>Harmonization guidelines and study specific procedures. The underlying rationale for the study, the procedures to be followed, the potential benefits, risks, alternatives, and other issues mandated by the consent process will be fully disclosed. If new information becomes available during the course of the trial that may be relevant to the subject's consent, the Informed Consent Form will be revised and the revised version will be submitted for EC/IRB approval before use.<br/>REMOVED</p>                                                                                                                                                                                                                                                                     |                                                                                                                                                                       |
| <p>19.0 /51<br/>Confidentiality of<br/>Subjects</p> | <p>Subject information collected in this study will comply with the standards for protection of privacy of individually identifiable health information as promulgated in the Health Assurance Portability and Accountability Act and as mandated in Title 45 CFR, Parts 160 and 164.</p> <p>All records will be kept confidential and the subject's name will not be released by study staff at any time. Subject records will not be released to anyone other than DCRI and/or their designee, and responsible regulatory authorities when requested.</p> <p>In all cases, caution will be exercised to assure the data are treated confidentially and that the subject's privacy is protected.</p> | <p>Subject information collected in this study</p> <p>REMOVED</p> <p>and all records will be kept confidential and the subject's name will not be released by study staff at any time.<br/>REMOVED</p> <p>When requested patient medical records may be examined by authorized monitors (DCRI and/or their designee) or Clinical Quality Assurance auditors appointed by the sponsor, by appropriate IRB / IEC members and by domestic and foreign regulatory authorities. In all cases, caution will be exercised to assure the data are treated confidentially and that the subject's privacy is protected. Furthermore; for clinical trial sites located in the US, the NHLBI has issued CABANA a Certificate of Confidentiality to protect the privacy of research subjects</p> | <p>Language revised/ inserted for regulatory compliance. Please note; for clinical trial sites located in the US, CABANA now has a Certificate of Confidentiality</p> |

|                                       |                                                                                                                                                                                                                                                                                                                                                                                                                                                                                                                                                                                                                                                                                                                                                                                                                                                                                                                                                                                                                                                                                        |                                                                                                                                                                                                                                                                                                                                                                                                                                                                                                                                                                                                                                                                                                                                                                                                                                                                                                                                                                                                                                                                                                                                                                                                                 |                                                                                             |
|---------------------------------------|----------------------------------------------------------------------------------------------------------------------------------------------------------------------------------------------------------------------------------------------------------------------------------------------------------------------------------------------------------------------------------------------------------------------------------------------------------------------------------------------------------------------------------------------------------------------------------------------------------------------------------------------------------------------------------------------------------------------------------------------------------------------------------------------------------------------------------------------------------------------------------------------------------------------------------------------------------------------------------------------------------------------------------------------------------------------------------------|-----------------------------------------------------------------------------------------------------------------------------------------------------------------------------------------------------------------------------------------------------------------------------------------------------------------------------------------------------------------------------------------------------------------------------------------------------------------------------------------------------------------------------------------------------------------------------------------------------------------------------------------------------------------------------------------------------------------------------------------------------------------------------------------------------------------------------------------------------------------------------------------------------------------------------------------------------------------------------------------------------------------------------------------------------------------------------------------------------------------------------------------------------------------------------------------------------------------|---------------------------------------------------------------------------------------------|
|                                       |                                                                                                                                                                                                                                                                                                                                                                                                                                                                                                                                                                                                                                                                                                                                                                                                                                                                                                                                                                                                                                                                                        | by withholding their identifiable information from all persons not connected with this research.                                                                                                                                                                                                                                                                                                                                                                                                                                                                                                                                                                                                                                                                                                                                                                                                                                                                                                                                                                                                                                                                                                                |                                                                                             |
| 22.0 /52<br>IRB / EC Committee Review | The appropriate IRB/EC must approve the protocol and informed consent documents, agree to monitor the conduct of the study, and agree to review study progress periodically, at intervals not to exceed 1 year. The investigator will provide DCRI or their designee with documentation that the IRB has approved the study <i>before</i> the study may begin. In addition, the investigator must provide the following documentation to DCRI or their designee.<br>1. IRB annual reapproval of the protocol, per current Title 21 CFR 312.66 regulations and 1997 International Conference on Harmonization guidelines.<br>2. IRB approval of revisions to the informed consent documents or any amendments to the protocol. Any revisions to the protocol that may increase subject risk exposure must be approved prior to implementation. Administrative changes (such as a change in address or phone number) must be sent to IRBs/Ethics Committees but do not require their approval. The investigator will provide DCRI or their designee with documentation of all approvals. | This study will be initiated only after all required documentation has been reviewed and approved by the respective IRB/EC and competent authority (CA) according to national and international regulations.<br>The investigator will provide DCRI or their designee with the study approval documentation before the study may begin. The same is applicable for the implementation of changes introduced by amendments.<br>Where applicable, the investigator must also provide to DCRI and/or their designee the following documentation:<br>1. A copy of IRB annual re-approval of the protocol per current Title 21 CFR 312.66 regulations and 1997 International Conference on Harmonization guidelines.<br>2. IRB approval of revisions to the informed consent documents.<br>Administrative changes (such as a change in address or phone number) must be sent to IRBs/Ethics Committees but do not require their approval.<br>3. The investigator must submit periodic status reports to their EC as required, as well as notification of completion of the study and a final report where applicable.<br>4. The investigator will provide DCRI or their designee with documentation of all approvals. | Language revised/ accuracy and regulatory compliance                                        |
| Appendix A /61                        |                                                                                                                                                                                                                                                                                                                                                                                                                                                                                                                                                                                                                                                                                                                                                                                                                                                                                                                                                                                                                                                                                        | Added<br>26. Persistent PFO/iatrogenic ASD                                                                                                                                                                                                                                                                                                                                                                                                                                                                                                                                                                                                                                                                                                                                                                                                                                                                                                                                                                                                                                                                                                                                                                      | The list of Anticipated Events has been updated according to the most recent clinical data. |
| Appendix B/63                         |                                                                                                                                                                                                                                                                                                                                                                                                                                                                                                                                                                                                                                                                                                                                                                                                                                                                                                                                                                                                                                                                                        | Biosense Webster ThermoCool® SF<br>Medtronic Cryocath LP Arctic Front®                                                                                                                                                                                                                                                                                                                                                                                                                                                                                                                                                                                                                                                                                                                                                                                                                                                                                                                                                                                                                                                                                                                                          | Updated approved catheter list                                                              |



|                                                                                          |                                          |                                                                                                                                                                                                                                                           |                                                                                                                |
|------------------------------------------------------------------------------------------|------------------------------------------|-----------------------------------------------------------------------------------------------------------------------------------------------------------------------------------------------------------------------------------------------------------|----------------------------------------------------------------------------------------------------------------|
| Appendix C /64<br>CABANAgene<br>Appendix A:<br>CABANA<br>Inclusion/Exclusion<br>Criteria | Sample size 3000<br><br>2 year follow-up | <b>Medtronic Cardiac Ablation System</b><br><br>Revised accordingly in sections referring to <b>sample size (2,000-2,200)</b> and duration follow-up ( <b>an average of approximately 5 years</b> ).<br><br><b>Revised per CABANA protocol Version3.5</b> | Reflection of the changes within the main CABANA Trial population, follow-up timeline, and Inclusion/Exclusion |
|------------------------------------------------------------------------------------------|------------------------------------------|-----------------------------------------------------------------------------------------------------------------------------------------------------------------------------------------------------------------------------------------------------------|----------------------------------------------------------------------------------------------------------------|
